# Supplementary material for: Lung microbiota predict invasive pulmonary aspergillosis and its outcome in immunocompromised patients
Source: PubMed Central journal article supplement — Thorax. 2021 Jun 25;77(3):283–91. doi: 10.1136/thoraxjnl-2020-216179 (PMC8867272; doi:10.1136/thoraxjnl-2020-216179), 2021-06-25
Supplement: thoraxjnl-2020-216179supp001.pdf [file thoraxjnl-2020-216179supp001.pdf]

## Supplementary Material

### **Lung microbiota predict invasive pulmonary aspergillosis and its outcome in immunocompromised patients**

Anaïs Hérivaux, Jesse R. Willis, Toine Mercier, Katrien Lagrou, Samuel M. Gonçalves, Relber A. Gonçalves, Johan Maertens, Agostinho Carvalho, Toni Gabaldón, Cristina Cunha

## Supplementary Methods

### *BAL collection and processing*

Neutropenic patients or patients that were otherwise immunosuppressed with fever not responding to 4-5 days of broad-spectrum antibiotics, or with an abnormal chest X-ray, or with signs and symptoms suggestive of fungal infection (e.g., dyspnea, hemoptysis, dry cough, pleuritic chest pain) or with a positive serum galactomannan index ( $\geq 0.5$ ) underwent high resolution or spiral chest CT-scan. In case of abnormal radiological features, patients underwent bronchoscopy and BAL specimens were collected by instillation of a 0.9% sterile saline solution using a flexible fiberoptic bronchoscope following local anesthesia with 2% lidocaine (Xylocaine). The sampling area was determined based on the localization of lesions on chest imaging. BAL specimens with comparable recovery rates were used. Bacterial DNA was extracted, amplified, and sequenced according to previously published protocols <sup>1</sup> at Microomics Systems, Spain. Sequencing was performed using the Illumina MiSeq platform.

### *Galactomannan testing*

The Platelia *Aspergillus* EIA (Bio-Rad, Marnes-la-Coquette, France) was used during routine microbiological workup to detect the presence of galactomannan on uncentrifuged BAL specimens, as described previously <sup>2</sup>. The enzyme immunoassay data was expressed as galactomannan index.

### *ELISA*

Cytokines were quantified in BAL samples using customized Human Premixed Multi-Analyte Kits (R&D Systems, MN, USA). All cytokine determinations were performed in duplicates, and concentrations were reported in pg/mL.

### *Sequencing quality control*

Samples were filtered using the FastQ Toolkit utility using a threshold of PHRED quality q10, and the first 16 bases of all sequences were eliminated by removing the sequence homology of the

PCR primers described in the Illumina protocol. The sequencing reads assigned to each of the samples ranged between 5,766–348,106 useful sequences after filtering and quality trimming. The depth of sequencing achieved for each of the samples allowed to cover much of the species diversity and guaranteed the absence of bias in this regard, allowing establishing levels of alpha diversity (intragroup) and beta diversity (intergroup). These curves resulted in a typical plateau of metagenomes with optimal coverage levels, and a further increase in the number of sequences was not accompanied by an increase in the number of operational taxonomic units (OTUs)<sup>3</sup>. The sequencing depth level allowed covering not only the most represented taxa (core community), but also the less frequent. The quality level of the resulting reads allowed the identification of significant hits in more than 70% of cases at the genus level in the majority of the samples.

#### *Pre-processing of 16S rRNA sequence reads*

Raw sequence reads were processed by following the pipeline for the DADA2 R package (version 1.10.1)<sup>4</sup> to obtain counts of amplicon sequence variants (ASVs). Sequence taxonomy was assigned using the DADA2-formatted database of sequences derived from the SILVA database version 132<sup>5</sup>. The resulting ASV counts were stored along with metadata for samples and analyzed using the Phyloseq R package (version 1.26.1)<sup>6</sup>. A phylogenetic tree of the organisms present in the dataset was approximated following a workflow<sup>7</sup> which relies on the DECIPHER (version 2.10.2)<sup>8</sup> and phangorn (version 2.5.5)<sup>9</sup> R packages. Only samples with at least 1,000 total counts after processing with DADA2 were retained. ASV counts were normalized per sample to give the relative abundance of each taxon within a sample. Blank controls were treated as the other samples, but these failed to produce any amplicon band and library, and were not subsequently sequenced. As part of a quality control check, we also included four sequenced runs of mock communities, two with even mixtures of organisms (HM277D and HM782D), and two with staggered mixtures (HM278D and HM783D). A breakdown of the proportions of taxa that are expected in each sample, and the real abundances found in our sequencing runs is shown in supplementary file 1.

#### *Diversity measures*

The *estimate\_richness* function from the *Phyloseq* package was used to calculate alpha diversity measures. For beta diversity, the *vegdist* function from the *vegan* R package (version 2.5-5) <sup>10</sup> was used to obtain both the Bray-Curtis and the Jaccard distances.

#### *Identification of discriminant abundance profiles*

The bacterial abundance profiles were calculated at taxonomic levels from phylum to genus using the linear discriminant analysis effect size (LEfSe) pipeline <sup>11</sup>. Biological consistency was investigated with a set of pairwise tests among subclasses using the unpaired Wilcoxon rank sum test. LDA was used to estimate the effect size of each differentially abundant trait (a threshold of 3.0 or -3.0 was used for logarithmic LDA scores).

#### *Statistical analyses*

Multiple versions of the linear model used to test the associations between variables and particular taxa were tested to check for potential confounding variables. Along with the four fixed effects mentioned (case/control, age, gender, and sequencing batch), models that also included antibiotic use, steroid use, lymphocyte counts, as well as a model with all seven variables together, were separately tested. None of these additional models indicated any batch effects, so the results presented are based on the original model. Model assumptions were checked for each reported model using the *plot* R function on the linear model object. The residuals vs fitted plot showed that the models held to the linearity and homoscedasticity assumptions. The QQ plot showed that the models held to the normality assumption. The scale-location plot further ensured homoscedasticity. The Cook's distance plot showed that there were no overly influential data points impacting the model. The results presented are based on the model including the variables case/control, gender, age, and sequencing date. The p-values from the model were adjusted using the "*fdr*" option in the *p.adjust* function from the *stats* R package (version 3.6.3) <sup>12</sup>. Figures were generated using the *ggplot2* R package (version 3.3.0) <sup>13</sup>. For outcome analyses, hazard ratios were calculated using the *coxph* function from the *survival* R package (version 3.2-7) <sup>14</sup>, which fits a Cox proportional hazards regression model to a survival object, created with the *Surv*

function from the same package. The survival object considers the time to date of last follow-up or death, along with the outcome, either alive or deceased.

## References

1. Willis JR, Gonzalez-Torres P, Pittis AA, et al. Citizen science charts two major "stomatotypes" in the oral microbiome of adolescents and reveals links with habits and drinking water composition. *Microbiome* 2018;6(1):218. doi: 10.1186/s40168-018-0592-3
2. D'Haese J, Theunissen K, Vermeulen E, et al. Detection of galactomannan in bronchoalveolar lavage fluid samples of patients at risk for invasive pulmonary aspergillosis: analytical and clinical validity. *J Clin Microbiol* 2012;50(4):1258-63. doi: 10.1128/JCM.06423-11
3. Ercolini D. High-throughput sequencing and metagenomics: moving forward in the culture-independent analysis of food microbial ecology. *Appl Environ Microbiol* 2013;79(10):3148-55. doi: 10.1128/AEM.00256-13
4. Callahan BJ, McMurdie PJ, Rosen MJ, et al. DADA2: High-resolution sample inference from Illumina amplicon data. *Nat Methods* 2016;13(7):581-3. doi: 10.1038/nmeth.3869
5. Callahan B. Silva taxonomic training data formatted for DADA2 (Silva version 132). *Zenodo* 2018
6. McMurdie PJ, Holmes S. phyloseq: an R package for reproducible interactive analysis and graphics of microbiome census data. *PLoS One* 2013;8(4):e61217. doi: 10.1371/journal.pone.0061217
7. Callahan BJ, Sankaran K, Fukuyama JA, et al. Bioconductor Workflow for Microbiome Data Analysis: from raw reads to community analyses. *F1000Res* 2016;5:1492. doi: 10.12688/f1000research.8986.2
8. Wright ES. Using DECIPHER v2. 0 to analyze big biological sequence data in R. *R Journal* 2016;8(1)
9. Schliep KP. phangorn: phylogenetic analysis in R. *Bioinformatics* 2011;27(4):592-3. doi: 10.1093/bioinformatics/btq706
10. Oksanen J, Blanchet F, Friendly M, et al. vegan: Community Ecology Package (R package version 2.5–5); 2019, 2019.
11. Segata N, Izard J, Waldron L, et al. Metagenomic biomarker discovery and explanation. *Genome Biol* 2011;12(6):R60. doi: 10.1186/gb-2011-12-6-r60
12. Team R. A Language and Environment for Statistical Computing. 2006. Available at [www R-project.org](http://www.R-project.org) 2018

13. Wickham H. *ggplot2: elegant graphics for data analysis*: Springer 2016.
14. Therneau T. A Package for Survival Analysis in R. *R package version 32-7* 2020

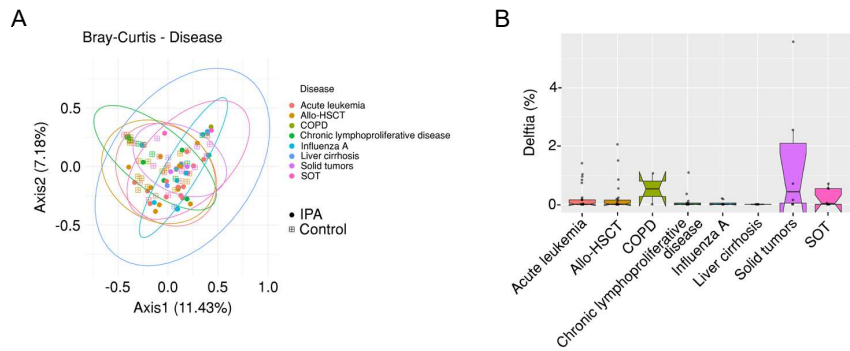

**Figure S1. The underlying disease does not influence the lung microbiome.** A) Principal coordinate analysis between cases of IPA and controls based on the Bray-Curtis dissimilarity metric according to the different underlying diseases in the cohort. Circles indicate cases of IPA and squares indicate controls, and the underlying diseases are identified by different colors. B) Relative abundance of *Delftia* (%) in the overall cohort grouped according to the underlying disease.



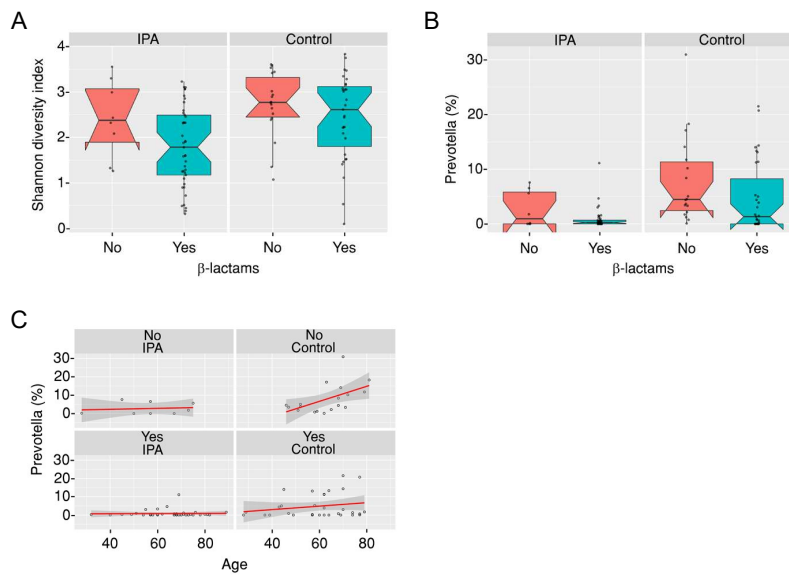

**Figure S2. The microbiome in IPA is not affected by  $\beta$ -lactam antibiotics.** Boxplots illustrating A) the alpha diversity (measured by the Shannon diversity index) of the lung microbiome and B) the relative abundance of *Prevotella* (%) among patients receiving (Yes) or not (No)  $\beta$ -lactams grouped according to the infection status (IPA and controls). Median values and interquartile ranges are indicated in the plots. C) Association analysis between the relative abundance of *Prevotella* (%) and the age of the patients in the overall cohort among patients receiving (Yes) or not (No)  $\beta$ -lactams grouped according to the infection status (IPA and controls).

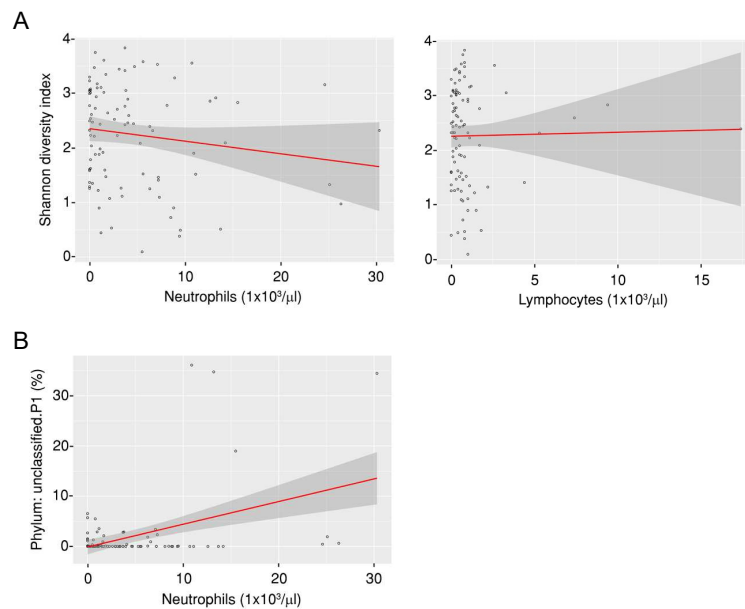

**Figure S3. Immune cell counts are not associated with microbiome diversity.** A) Association analysis between the alpha diversity (measured by the Shannon diversity index) of the lung microbiome and the number of neutrophils and lymphocytes (expressed as  $1 \times 10^3/\mu\text{l}$ ) in BAL samples from the overall cohort. B) Association analysis between the relative abundance of unclassified taxa at the phylum level (%) with the number of neutrophils (expressed as  $1 \times 10^3/\mu\text{l}$ ) in BAL samples from the overall cohort.

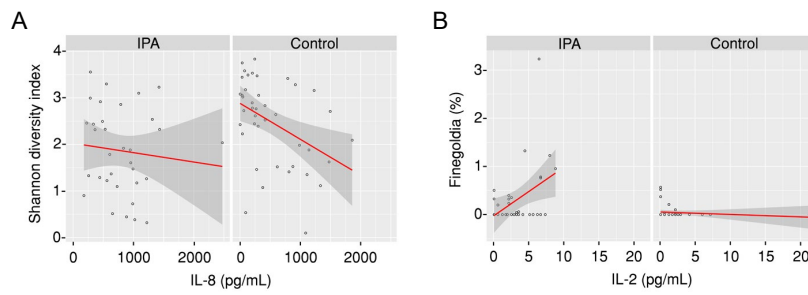

**Figure S4. Alveolar cytokines promote IPA-specific effects on microbiome composition.** A) Association analysis between the alpha diversity (measured by the Shannon diversity index) and the levels of IL-8 in BAL samples from cases of IPA and control patients. B) Association analysis between the abundance of *Fingoldia* (%) and the levels of IL-2 in BAL samples from cases of IPA and control patients.

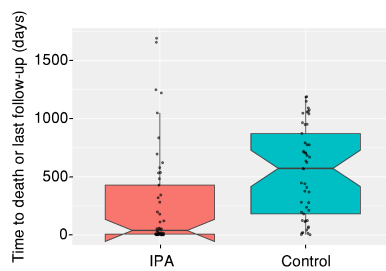

**Figure S5. Time to death or last follow-up is shorter in IPA.** Boxplot illustrating the time to death or date of last follow-up (days) among cases of IPA and control patients. Median values and interquartile ranges are indicated in the plots.

**Table S1. Levels of alveolar cytokines and chemokines in cases of IPA and controls.**

| <b>Analytes, mean<br/>(pg/mL, range)</b> | <b>IPA<br/>(n=38)</b>  | <b>Controls<br/>(n=41)</b> | <b>P value</b> |
|------------------------------------------|------------------------|----------------------------|----------------|
| IL-1 $\alpha$                            | 12.2 (0.01-86.8)       | 2.9 (0.0-28.4)             | <0.001         |
| IL-1 $\beta$                             | 266.2 (1.2-1270.0)     | 90.2 (1.5-854.6)           | 0.002          |
| IL-1RA                                   | 15584.0 (33.1-96754.4) | 16120.0 (344.6-136777.7)   | 0.78           |
| IL-2                                     | 3.8 (0.1-8.8)          | 1.8 (0.1-21.3)             | <0.001         |
| IL-4                                     | 0.8 (0.01-11.6)        | 0.5 (0.01-5.9)             | 0.80           |
| IL-5                                     | 4.1 (0.1-9.9)          | 2.5 (0.1-20.5)             | <0.001         |
| IL-6                                     | 1039.0 (4.7-4938.2)    | 264.2 (0.02-3851.4)        | 0.001          |
| IL-7                                     | 3.3 (0.01-19.5)        | 1.4 (0.01-8.0)             | 0.03           |
| IL-8                                     | 808.6 (179.0-2472.0)   | 511.9 (2.4-1859.2)         | 0.002          |
| IL-9                                     | 0.7 (0.6-3.3)          | 0.7 (0.6-5.1)              | 0.83           |
| IL-10                                    | 1.2 (0.04-7.0)         | 1.9 (0.1-27.8)             | 0.87           |
| IL-12p70                                 | 1.0 (0.5-2.5)          | 1.0 (0.4-4.9)              | 0.09           |
| IL-13                                    | 0.8 (0.10-3.4)         | 0.7 (0.1-3.8)              | 0.20           |
| IL-15                                    | 0.9 (0.70-5.8)         | 1.0 (0.7-8.9)              | 0.67           |
| IL-17A                                   | 2.5 (0.30-14.90)       | 0.5 (0.30-3.6)             | <0.001         |
| IL-18                                    | 36.5 (0.7-233.7)       | 65.4 (0.7-443.3)           | 0.30           |
| IL-21                                    | 10.3 (0.10-58.3)       | 3.5 (0.10-65.9)            | 0.02           |
| IL-22                                    | 4.9 (0.1-78.5)         | 2.4 (0.1-47.2)             | 0.05           |
| IL-23                                    | 10.2 (0.1-74.4)        | 4.9 (0.2-13.9)             | 0.004          |
| IL-27                                    | 8.2 (0.8-28.9)         | 4.51 (0.80-19.4)           | 0.16           |
| IL-31                                    | 4.0 (0.30-17.3)        | 1.1 (0.30-11.5)            | 0.01           |
| Eotaxin                                  | 26.0 (1.7-128.2)       | 11.6 (0.4-55.4)            | 0.004          |
| GM-CSF                                   | 5.6 (0.20-124.0)       | 0.5 (0.20-8.6)             | 0.005          |
| GRO.A                                    | 133.3 (0.6-351.8)      | 128.9 (0.0-271.2)          | 0.82           |
| IFN- $\alpha$                            | 0.1 (0.10-0.3)         | 1.7 (0.10-58.50)           | 0.50           |
| IFN- $\gamma$                            | 14.9 (0.10-82.7)       | 41.9 (0.10-746.2)          | 0.23           |
| IP10                                     | 320.1 (2.1-1863.3)     | 284.6 (0.99-2160.9)        | 0.55           |
| MCP-1                                    | 842.3 (114.3-2207.0)   | 462.0 (23.3-1198.7)        | <0.001         |
| MCP-1A                                   | 62.5 (0.4-437.3)       | 39.8 (0.01-303.6)          | 0.10           |
| MCP-1B                                   | 320.1 (19.7-2575.9)    | 305.3 (5.0-4439.5)         | 0.34           |
| RANTES                                   | 13.8 (1.1-103.7)       | 6.0 (0.1-30.9)             | 0.004          |
| SDF-1A                                   | 483.6 (31.5-1102.5)    | 469.5 (7.9-928.7)          | 0.82           |
| TNF- $\alpha$                            | 21.5 (0.30-592.0)      | 2.0 (0.30-25.5)            | 0.05           |
| TNF- $\beta$                             | 4.9 (0.10-110.6)       | 3.7 (0.10-104.1)           | 0.76           |

IPA, invasive pulmonary aspergillosis; IL, interleukin; GM-CSF, granulocyte-macrophage colony-stimulating factor; GRO.A, human growth-regulated oncogene A; IFN, interferon; IP10, interferon gamma-induced protein 10; MCP, monocyte chemoattractant protein; RANTES, regulated on activation, normal T cell expressed and secreted; SDF-1A, stromal cell-derived factor 1A; TNF: tumor necrosis factor. P values were calculated by Mann-Whitney's test or Student's t-test.

**Table S2. Significant associations between analytes and the abundance of bacterial taxa.**

| Analyte      | Bacterial taxa             | Association | P value |
|--------------|----------------------------|-------------|---------|
| IL-1 $\beta$ | <i>Staphylococcus</i>      | Negative    | 0.05    |
| IL-1RA       | <i>Streptococcus</i>       | Positive    | 0.01    |
|              | <i>Lactobacillales</i>     | Positive    | 0.01    |
| IL-2         | <i>Bifidobacterium</i>     | Positive    | <0.001  |
|              | <i>Finegoldia</i>          | Positive    | 0.04    |
|              | <i>Halomonas</i>           | Positive    | 0.003   |
| IL-5         | <i>Bifidobacterium</i>     | Positive    | <0.001  |
|              | <i>Unclassified.P1</i>     | Positive    | 0.006   |
| IL-6         | <i>Atopostipes</i>         | Positive    | 0.001   |
|              | <i>Bifidobacterium</i>     | Positive    | <0.001  |
|              | <i>Curvibacter</i>         | Positive    | 0.04    |
|              | <i>Finegoldia</i>          | Positive    | <0.001  |
|              | <i>Halomonas</i>           | Positive    | <0.001  |
|              | <i>Paraclostridium</i>     | Positive    | <0.001  |
|              | <i>Unclassified.P1</i>     | Positive    | <0.001  |
| IL-7         | <i>Staphylococcus</i>      | Positive    | 0.002   |
|              | <i>Acetobacteraceae</i>    | Positive    | <0.001  |
|              | <i>Bacillales</i>          | Positive    | 0.005   |
| IL-8         | <i>Acinetobacter</i>       | Negative    | 0.004   |
|              | <i>Delftia</i>             | Negative    | 0.03    |
|              | <i>Renibacterium</i>       | Negative    | 0.009   |
|              | <i>Sphingomonas</i>        | Negative    | 0.003   |
|              | <i>Alphaproteobacteria</i> | Negative    | 0.02    |
| IL-10        | <i>Bifidobacterium</i>     | Positive    | <0.001  |
| IL-12p70     | <i>Bifidobacterium</i>     | Positive    | <0.001  |
|              | <i>Sphingomonas</i>        | Negative    | 0.008   |
|              | <i>Alphaproteobacteria</i> | Negative    | 0.006   |
|              | <i>Clostridia</i>          | Negative    | 0.03    |
| IL-13        | <i>Bifidobacterium</i>     | Positive    | 0.002   |
|              | <i>Capnocytophaga</i>      | Positive    | <0.001  |
|              | <i>Porphyromonas</i>       | Positive    | 0.006   |
|              | <i>Sphingomonas</i>        | Negative    | 0.01    |
| IL-18        | <i>Sphingomonas</i>        | Negative    | 0.05    |
| IL-22        | <i>Corynebacterium</i>     | Positive    | <0.001  |
|              | <i>Corynebacteriaceae</i>  | Positive    | <0.001  |
| IL-23        | <i>Enterococcus</i>        | Positive    | <0.001  |
|              | <i>Actinobacteria</i>      | Negative    | 0.04    |
| IL-27        | <i>Sphingomonas</i>        | Negative    | 0.02    |

|         |                            |          |        |
|---------|----------------------------|----------|--------|
|         | <i>Actinobacteria</i>      | Negative | 0.005  |
|         | <i>Alphaproteobacteria</i> | Negative | 0.01   |
| Eotaxin | <i>Staphylococcus</i>      | Positive | <0.001 |
|         | <i>Proteobacteria</i>      | Negative | 0.04   |
| GRO.A   | <i>Acinetobacter</i>       | Negative | 0.002  |
|         | <i>Delftia</i>             | Negative | 0.02   |
|         | <i>Sphingomonas</i>        | Negative | 0.02   |
|         | <i>Variovorax</i>          | Negative | 0.01   |
|         | <i>Alphaproteobacteria</i> | Negative | 0.04   |
|         | <i>Patescibacteria</i>     | Positive | 0.005  |
| MCP-1   | <i>Anaerococcus</i>        | Positive | 0.003  |
|         | <i>Ferruginibacter</i>     | Negative | 0.003  |
|         | <i>Fingoldia</i>           | Positive | 0.003  |
|         | <i>Halomonas</i>           | Positive | 0.002  |
|         | <i>Sphingomonas</i>        | Negative | 0.02   |
| MCP-1A  | <i>Pseudomonas</i>         | Positive | <0.001 |
|         | <i>Sphingomonadaceae</i>   | Negative | 0.05   |
| MCP-1B  | <i>Pseudomonas</i>         | Positive | 0.02   |
|         | <i>Streptococcus</i>       | Positive | 0.003  |
| RANTES  | <i>Escherichia</i>         | Positive | 0.002  |
|         | Unclassified.P1            | Positive | 0.01   |
| SDF-1A  | <i>Acinetobacter sp.</i>   | Negative | 0.001  |
|         | <i>Delftia sp.</i>         | Negative | 0.04   |
|         | <i>Renibacterium sp.</i>   | Negative | 0.004  |
|         | <i>Sphingomonas sp.</i>    | Negative | 0.009  |
|         | <i>Variovorax sp.</i>      | Negative | 0.01   |
|         | <i>Chitinophagaceae</i>    | Negative | 0.002  |
|         | <i>Rhizobiales</i>         | Negative | 0.02   |
|         | <i>Alphaproteobacteria</i> | Negative | 0.02   |

IPA, invasive pulmonary aspergillosis; IL, interleukin; GRO.A, human growth-regulated oncogene A; MCP, monocyte chemoattractant protein; RANTES, regulated on activation, normal T cell expressed and secreted; SDF-1A, stromal cell-derived factor 1A.



## Supplementary File 1

|                   | mock.genera.copies |           |        |           |
|-------------------|--------------------|-----------|--------|-----------|
|                   | Even               | Staggered | Even   | Staggered |
| Acinetobacter     | 5                  | 0,22      | HM277D | HM278D    |
| Actinomyces       | 5                  | 0,02      | HM782D | HM783D    |
| Bacillus          | 5                  | 2,19      |        |           |
| Bacteroides       | 5                  | 0,02      |        |           |
| Clostridium       | 5                  | 2,19      |        |           |
| Deinococcus       | 5                  | 0,02      |        |           |
| Enterococcus      | 5                  | 0,02      |        |           |
| Escherichia       | 5                  | 21,91     |        |           |
| Helicobacter      | 5                  | 0,22      |        |           |
| Lactobacillus     | 5                  | 0,22      |        |           |
| Listeria          | 5                  | 0,22      |        |           |
| Neisseria         | 5                  | 0,22      |        |           |
| Propionibacterium | 5                  | 0,22      |        |           |
| Pseudomonas       | 5                  | 2,19      |        |           |
| Rhodobacter       | 5                  | 21,91     |        |           |
| Staphylococcus    | 10                 | 24,1      |        |           |
| Streptococcus     | 15                 | 24,12     |        |           |

## mock\_rel\_abunds

|                                                                  | HM277D     | HM278D     | HM782D     | HM783D     | Even   | Staggered |
|------------------------------------------------------------------|------------|------------|------------|------------|--------|-----------|
| Acinetobacter                                                    | 5,67893933 | 0,28665287 | 3,98827913 | 0,23108062 | HM277D | HM278D    |
| Actinomyces                                                      | 1,83202721 | 0,01433264 | 2,01535381 | 0,01670462 | HM782D | HM783D    |
| Bacillus                                                         | 5,30188772 | 2,23015932 | 4,64790973 | 2,41882945 |        |           |
| Bacteroides                                                      | 8,8885603  | 0,06936999 | 8,14494637 | 0,05735254 |        |           |
| Bifidobacterium                                                  | 0          | 0          | 0          | 0,00334092 |        |           |
| Brucella                                                         | 0          | 0          | 0          | 0,00167046 |        |           |
| Clostridium                                                      | 5,40884223 | 2,07422016 | 4,46626271 | 1,92381578 |        |           |
| Corynebacterium                                                  | 0,00542166 | 0          | 0,00530356 | 0          |        |           |
| Cutibacterium                                                    | 1,24402386 | 0,06535685 | 1,39815171 | 0,08686404 |        |           |
| Deinococcus                                                      | 2,09719552 | 0,01261273 | 3,35118866 | 0,0295115  |        |           |
| Enterococcus                                                     | 3,30080339 | 0,05790388 | 2,64051126 | 0,06514803 |        |           |
| Escherichia                                                      | 6,16885997 | 22,243116  | 6,53200037 | 23,5301324 |        |           |
| Granulicatella                                                   | 0          | 0,04299793 | 0          | 0          |        |           |
| Helicobacter                                                     | 9,50268618 | 0,57674557 | 11,7951234 | 0,51060465 |        |           |
| Lactobacillus                                                    | 6,31475184 | 0,32047791 | 5,22997574 | 0,34411524 |        |           |
| Leptotrichia                                                     | 0          | 0          | 0          | 0,01503416 |        |           |
| Listeria                                                         | 5,45024397 | 0,2098299  | 5,54288593 | 0,21326236 |        |           |
| Neisseria                                                        | 7,36113165 | 0,3697822  | 9,0989247  | 0,39534275 |        |           |
| Paraclostridium                                                  | 0          | 0          | 0          | 0,00501139 |        |           |
| Pseudomonas                                                      | 1,87540046 | 0,81409415 | 4,30980761 | 1,48058644 |        |           |
| Rhodobacter                                                      | 2,050865   | 8,17992627 | 2,54438419 | 9,87911421 |        |           |
| Rothia                                                           | 0          | 0          | 0,0072924  | 0,0027841  |        |           |
| Serratia                                                         | 0          | 0          | 0,16109572 | 0          |        |           |
| Staphylococcus                                                   | 12,9454384 | 32,0477908 | 11,7467284 | 27,4401278 |        |           |
| Streptococcus                                                    | 14,5729213 | 30,3341799 | 12,3294573 | 31,2911003 |        |           |
| unclassified.Bacteria.Firmicutes.Bacilli.Bacillales.unclassified | 0          | 0,00057331 | 0          | 0          |        |           |
| Veillonella                                                      | 0          | 0,0498776  | 0,04441734 | 0,05846618 |        |           |

## Good.mock.rel\_abunds

|                | HM277D     | HM278D     | HM782D     | HM783D     |
|----------------|------------|------------|------------|------------|
| Acinetobacter  | 5,67893933 | 0,28665287 | 3,98827913 | 0,23108062 |
| Actinomyces    | 1,83202721 | 0,01433264 | 2,01535381 | 0,01670462 |
| Bacillus       | 5,30188772 | 2,23015932 | 4,64790973 | 2,41882945 |
| Bacteroides    | 8,8885603  | 0,06936999 | 8,14494637 | 0,05735254 |
| Clostridium    | 5,40884223 | 2,07422016 | 4,46626271 | 1,92381578 |
| Deinococcus    | 2,09719552 | 0,01261273 | 3,35118866 | 0,0295115  |
| Enterococcus   | 3,30080339 | 0,05790388 | 2,64051126 | 0,06514803 |
| Escherichia    | 6,16885997 | 22,243116  | 6,53200037 | 23,5301324 |
| Helicobacter   | 9,50268618 | 0,57674557 | 11,7951234 | 0,51060465 |
| Lactobacillus  | 6,31475184 | 0,32047791 | 5,22997574 | 0,34411524 |
| Listeria       | 5,45024397 | 0,2098299  | 5,54288593 | 0,21326236 |
| Neisseria      | 7,36113165 | 0,3697822  | 9,0989247  | 0,39534275 |
| Pseudomonas    | 1,87540046 | 0,81409415 | 4,30980761 | 1,48058644 |
| Rhodobacter    | 2,050865   | 8,17992627 | 2,54438419 | 9,87911421 |
| Staphylococcus | 12,9454384 | 32,0477908 | 11,7467284 | 27,4401278 |
| Streptococcus  | 14,5729213 | 30,3341799 | 12,3294573 | 31,2911003 |

## Good.mock.rel\_abunds

|                | HM277D     | HM278D     | HM782D     | HM783D     |
|----------------|------------|------------|------------|------------|
| Acinetobacter  | 5,67893933 | 0,28665287 | 3,98827913 | 0,23108062 |
| Actinomyces    | 1,83202721 | 0,01433264 | 2,01535381 | 0,01670462 |
| Bacillus       | 5,30188772 | 2,23015932 | 4,64790973 | 2,41882945 |
| Bacteroides    | 8,8885603  | 0,06936999 | 8,14494637 | 0,05735254 |
| Clostridium    | 5,40884223 | 2,07422016 | 4,46626271 | 1,92381578 |
| Deinococcus    | 2,09719552 | 0,01261273 | 3,35118866 | 0,0295115  |
| Enterococcus   | 3,30080339 | 0,05790388 | 2,64051126 | 0,06514803 |
| Escherichia    | 6,16885997 | 22,243116  | 6,53200037 | 23,5301324 |
| Helicobacter   | 9,50268618 | 0,57674557 | 11,7951234 | 0,51060465 |
| Lactobacillus  | 6,31475184 | 0,32047791 | 5,22997574 | 0,34411524 |
| Listeria       | 5,45024397 | 0,2098299  | 5,54288593 | 0,21326236 |
| Neisseria      | 7,36113165 | 0,3697822  | 9,0989247  | 0,39534275 |
| Pseudomonas    | 1,87540046 | 0,81409415 | 4,30980761 | 1,48058644 |
| Rhodobacter    | 2,050865   | 8,17992627 | 2,54438419 | 9,87911421 |
| Staphylococcus | 12,9454384 | 32,0477908 | 11,7467284 | 27,4401278 |
| Streptococcus  | 14,5729213 | 30,3341799 | 12,3294573 | 31,2911003 |

## Bad.mock.rel\_abunds

|                                                                  | HM277D     | HM278D     | HM782D     | HM783D     | Even   | Staggered |
|------------------------------------------------------------------|------------|------------|------------|------------|--------|-----------|
| Bifidobacterium                                                  | 0          | 0          | 0          | 0,00334092 | HM277D | HM278D    |
| Brucella                                                         | 0          | 0          | 0          | 0,00167046 | HM782D | HM783D    |
| Corynebacterium                                                  | 0,00542166 | 0          | 0,00530356 | 0          |        |           |
| Cutibacterium                                                    | 1,24402386 | 0,06535685 | 1,39815171 | 0,08686404 |        |           |
| Granulicatella                                                   | 0          | 0,04299793 | 0          | 0          |        |           |
| Leptotrichia                                                     | 0          | 0          | 0          | 0,01503416 |        |           |
| Paraclostridium                                                  | 0          | 0          | 0          | 0,00501139 |        |           |
| Rothia                                                           | 0          | 0          | 0,0072924  | 0,0027841  |        |           |
| Serratia                                                         | 0          | 0          | 0,16109572 | 0          |        |           |
| unclassified.Bacteria.Firmicutes.Bacilli.Bacillales.unclassified | 0          | 0,00057331 | 0          | 0          |        |           |
| Veillonella                                                      | 0          | 0,0498776  | 0,04441734 | 0,05846618 |        |           |

## mock.counts

|                                                                  | HM277D | HM278D | HM782D | HM783D | Even   | Staggered |
|------------------------------------------------------------------|--------|--------|--------|--------|--------|-----------|
| Acinetobacter                                                    | 11522  | 500    | 6016   | 415    | HM277D | HM278D    |
| Actinomyces                                                      | 3717   | 25     | 3040   | 30     | HM782D | HM783D    |
| Bacillus                                                         | 10757  | 3890   | 7011   | 4344   |        |           |
| Bacteroides                                                      | 18034  | 121    | 12286  | 103    |        |           |
| Bifidobacterium                                                  | 0      | 0      | 0      | 6      |        |           |
| Brucella                                                         | 0      | 0      | 0      | 3      |        |           |
| Clostridium                                                      | 10974  | 3618   | 6737   | 3455   |        |           |
| Corynebacterium                                                  | 11     | 0      | 8      | 0      |        |           |
| Cutibacterium                                                    | 2524   | 114    | 2109   | 156    |        |           |
| Deinococcus                                                      | 4255   | 22     | 5055   | 53     |        |           |
| Enterococcus                                                     | 6697   | 101    | 3983   | 117    |        |           |
| Escherichia                                                      | 12516  | 38798  | 9853   | 42258  |        |           |
| Granulicatella                                                   | 0      | 75     | 0      | 0      |        |           |
| Helicobacter                                                     | 19280  | 1006   | 17792  | 917    |        |           |
| Lactobacillus                                                    | 12812  | 559    | 7889   | 618    |        |           |
| Leptotrichia                                                     | 0      | 0      | 0      | 27     |        |           |
| Listeria                                                         | 11058  | 366    | 8361   | 383    |        |           |
| Neisseria                                                        | 14935  | 645    | 13725  | 710    |        |           |
| Paraclostridium                                                  | 0      | 0      | 0      | 9      |        |           |
| Pseudomonas                                                      | 3805   | 1420   | 6501   | 2659   |        |           |
| Rhodobacter                                                      | 4161   | 14268  | 3838   | 17742  |        |           |
| Rothia                                                           | 0      | 0      | 11     | 5      |        |           |
| Serratia                                                         | 0      | 0      | 243    | 0      |        |           |
| Staphylococcus                                                   | 26265  | 55900  | 17719  | 49280  |        |           |
| Streptococcus                                                    | 29567  | 52911  | 18598  | 56196  |        |           |
| unclassified.Bacteria.Firmicutes.Bacilli.Bacillales.unclassified | 0      | 1      | 0      | 0      |        |           |
| Veillonella                                                      | 0      | 87     | 67     | 105    |        |           |

## Supplementary File 2

| Figure                                                                | Variable            | Df      | Sum of Sqs | Mean Sqs | F model  | R2      | Pr(>F) |
|-----------------------------------------------------------------------|---------------------|---------|------------|----------|----------|---------|--------|
| <b>figure 1B<br/>(Bray-Curtis vs Case.control)</b>                    | <b>Case.Control</b> | 1       | 1.155      | 1.15548  | 2.9390   | 0.02996 | 0.001  |
|                                                                       | <b>Sex</b>          | 1       | 0.416      | 0.41584  | 1.0577   | 0.01078 | 0.319  |
|                                                                       | <b>Age</b>          | 1       | 0.436      | 0.43572  | 1.1083   | 0.01130 | 0.233  |
|                                                                       | <b>Residuals</b>    | 93      | 36.564     | 0.39316  | 0.094796 |         |        |
|                                                                       | <b>Total</b>        | 96      | 38.571     | 1.00000  |          |         |        |
| <b>figure 1B<br/>(Jaccard vs Case.control)</b>                        | <b>Case.Control</b> | 1       | 1.155      | 1.15548  | 2.9390   | 0.02996 | 0.001  |
|                                                                       | <b>Sex</b>          | 1       | 0.416      | 0.41584  | 1.0577   | 0.01078 | 0.322  |
|                                                                       | <b>Age</b>          | 1       | 0.436      | 0.43572  | 1.1083   | 0.01130 | 0.235  |
|                                                                       | <b>Residuals</b>    | 93      | 36.564     | 0.39316  | 0.94796  |         |        |
|                                                                       | <b>Total</b>        | 96      | 38.571     | 1.00000  |          |         |        |
| <b>figure 3A<br/>(Bray-Curtis vs Neutrophils) removing 4 outliers</b> | <b>Neutrophils</b>  | 1       | 1.219      | 1.21935  | 3.2091   | 0.03399 | 0.001  |
|                                                                       | <b>Case.Control</b> | 1       | 1.062      | 1.06153  | 2.7938   | 0.02959 | 0.001  |
|                                                                       | <b>Sex</b>          | 1       | 0.389      | 0.38921  | 1.0243   | 0.01085 | 0.407  |
|                                                                       | <b>Age</b>          | 1       | 0.526      | 0.52627  | 1.3850   | 0.01467 | 0.058  |
|                                                                       | <b>Residuals</b>    | 86      | 32.677     | 0.37996  | 0.91090  |         |        |
| <b>Total</b>                                                          | 90                  | 35.873  | 1.00000    |          |          |         |        |
| <b>figure 3A<br/>(Jaccard vs Neutrophils) removing 4 outliers</b>     | <b>Neutrophils</b>  | 1       | 0.5692     | 0.56922  | 1.7115   | 0.01852 | 0.011  |
|                                                                       | <b>Case.Control</b> | 1       | 0.7916     | 0.79159  | 2.3802   | 0.02575 | 0.001  |
|                                                                       | <b>Sex</b>          | 1       | 0.3952     | 0.39515  | 1.1882   | 0.01285 | 0.157  |
|                                                                       | <b>Age</b>          | 1       | 0.3838     | 0.38381  | 1.1541   | 0.01249 | 0.113  |
|                                                                       | <b>Residuals</b>    | 86      | 28.6016    | 0.33258  | 0.93039  |         |        |
| <b>Total</b>                                                          | 90                  | 30.7413 | 1.00000    |          |          |         |        |
| <b>figure 3B<br/>(Bray-Curtis vs Lymphocytes) removing 1 outlier</b>  | <b>Lymphocytes</b>  | 1       | 0.400      | 0.40015  | 1.0202   | 0.01085 | 0.380  |
|                                                                       | <b>Case.Control</b> | 1       | 1.054      | 1.05399  | 2.6873   | 0.02857 | 0.002  |
|                                                                       | <b>Sex</b>          | 1       | 0.507      | 0.50732  | 1.2935   | 0.01375 | 0.193  |
|                                                                       | <b>Age</b>          | 1       | 0.418      | 0.41796  | 1.0656   | 0.01133 | 0.305  |
|                                                                       | <b>Residuals</b>    | 88      | 34.515     | 0.39222  | 0.93551  |         |        |
| <b>Total</b>                                                          | 92                  | 36.894  | 1.00000    |          |          |         |        |
| <b>figure 3B<br/>(Jaccard vs Lymphocytes) removing 1 outlier</b>      | <b>Lymphocytes</b>  | 1       | 0.4057     | 0.40570  | 1.2155   | 0.01289 | 0.072  |
|                                                                       | <b>Case.Control</b> | 1       | 0.8561     | 0.85606  | 2.5649   | 0.02719 | 0.001  |
|                                                                       | <b>Sex</b>          | 1       | 0.4691     | 0.46910  | 1.4055   | 0.01490 | 0.059  |
|                                                                       | <b>Age</b>          | 1       | 0.3787     | 0.37872  | 1.1347   | 0.01203 | 0.153  |
|                                                                       | <b>Residuals</b>    | 88      | 29.3711    | 0.33376  | 0.93299  |         |        |
| <b>Total</b>                                                          | 92                  | 31.4807 | 1.00000    |          |          |         |        |
| <b>figure S1A<br/>(Disease) removing 1 outlier</b>                    | <b>Disease</b>      | 8       | 3.865      | 0.48308  | 1.2509   | 0.10152 | 0.077  |
|                                                                       | <b>Case.Control</b> | 1       | 0.913      | 0.91350  | 2.3654   | 0.02400 | 0.002  |
|                                                                       | <b>Sex</b>          | 1       | 0.448      | 0.44801  | 1.1601   | 0.01177 | 0.213  |
|                                                                       | <b>Age</b>          | 1       | 0.402      | 0.40160  | 1.0399   | 0.01055 | 0.307  |
|                                                                       | <b>Residuals</b>    | 84      | 32.440     | 0.38619  | 0.85216  |         |        |
| <b>Total</b>                                                          | 95                  | 38.068  | 1.00000    |          |          |         |        |

| Figure                                                          | Variable                            | Estimate | CI (2.5) | CI (97.5) | Std Err | t value | Pr(> t ) |
|-----------------------------------------------------------------|-------------------------------------|----------|----------|-----------|---------|---------|----------|
| figure 1C<br>(Shannon vs<br>Case.control)                       | Intercept                           | 2.4556   | 1.5262   | 3.3851    | 0.4680  | 5.2473  | 0.0000   |
|                                                                 | Case.controlControl                 | 0.6877   | 0.3349   | 1.0405    | 0.1776  | 3.8715  | 0.0002   |
|                                                                 | SexM                                | -0.1455  | -0.5153  | 0.2243    | 0.1862  | -0.7813 | 0.4366   |
|                                                                 | Age                                 | -0.0052  | -0.0188  | 0.0084    | 0.0068  | -0.7587 | 0.4500   |
|                                                                 | Group_Batch1                        | -0.3557  | -0.7060  | -0.0053   | 0.1764  | -2.0163 | 0.0467   |
| figure 1C<br>(Simpson vs<br>Case.control)                       | Intercept                           | 0.8057   | 0.5621   | 1.0493    | 0.1227  | 6.5692  | 0.0000   |
|                                                                 | Case.controlControl                 | 0.1391   | 0.0466   | 0.2315    | 0.0466  | 2.9870  | 0.0036   |
|                                                                 | SexM                                | -0.0113  | -0.1082  | 0.0856    | 0.0488  | -0.2317 | 0.8173   |
|                                                                 | Age                                 | -0.0017  | -0.0053  | 0.0019    | 0.0018  | -0.9458 | 0.3467   |
|                                                                 | Group_Batch1                        | -0.0748  | -0.1666  | 0.0170    | 0.0462  | -1.6178 | 0.1091   |
| figure 1C<br>(Species<br>richness vs<br>Case.control)           | Intercept                           | 62.6193  | 35.6817  | 89.5570   | 13.5632 | 4.6169  | 0.0000   |
|                                                                 | Case.controlControl                 | 18.2759  | 8.0513   | 28.5005   | 5.1481  | 3.5500  | 0.0006   |
|                                                                 | SexM                                | -13.1676 | -23.8850 | -2.4502   | 5.3962  | -2.4401 | 0.0166   |
|                                                                 | Age                                 | 0.0997   | -0.2940  | 0.4935    | 0.1983  | 0.5031  | 0.6161   |
|                                                                 | Group_Batch1                        | -27.6323 | -37.7854 | -17.4791  | 5.1121  | -5.4052 | 0.0000   |
| figure 4A<br>(Shannon vs IL-<br>8)<br>removing 2<br>outliers    | Intercept                           | 3.0946   | 1.8914   | 4.2978    | 0.6027  | 5.1349  | 0.0000   |
|                                                                 | IL-8                                | -0.0007  | -0.0012  | -0.0002   | 0.0002  | -2.8266 | 0.0062   |
|                                                                 | Case.controlControl                 | 0.4124   | -0.0230  | 0.8478    | 0.2181  | 1.8912  | 0.0630   |
|                                                                 | SexM                                | -0.1816  | -0.6240  | 0.2609    | 0.2216  | -0.8193 | 0.4156   |
|                                                                 | Age                                 | -0.0050  | -0.0222  | 0.0123    | 0.0087  | -0.5731 | 0.5685   |
| Group_Batch1                                                    | -0.4142                             | -0.8404  | 0.0119   | 0.2135    | -1.9406 | 0.0566  |          |
| figure 4A<br>(Shannon vs IL-<br>27)                             | Intercept                           | 2.8463   | 1.7136   | 3.9790    | 0.5675  | 5.0157  | 0.0000   |
|                                                                 | IL-27                               | -0.0481  | -0.0777  | -0.0186   | 0.0148  | -3.2565 | 0.0018   |
|                                                                 | Case.controlControl                 | 0.3908   | -0.0253  | 0.8069    | 0.2085  | 1.8749  | 0.0652   |
|                                                                 | SexM                                | -0.1100  | -0.5405  | 0.3206    | 0.2157  | -0.5098 | 0.6119   |
|                                                                 | Age                                 | -0.0044  | -0.0208  | 0.0120    | 0.0082  | -0.5371 | 0.5930   |
| Group_Batch1                                                    | -0.3134                             | -0.7295  | 0.1028   | 0.2085    | -1.5031 | 0.1375  |          |
| figure 4C<br>(Finegoldia vs IL-<br>2)<br>removing 2<br>outliers | Intercept                           | 0.3584   | -0.0092  | 0.7260    | 0.1841  | 1.9467  | 0.0558   |
|                                                                 | IL-2                                | 0.0363   | 0.0065   | 0.0661    | 0.0149  | 2.4289  | 0.0179   |
|                                                                 | Case.controlControl                 | -0.1285  | -0.2685  | 0.0115    | 0.0701  | -1.8328 | 0.0713   |
|                                                                 | SexM                                | 0.0070   | -0.1283  | 0.1422    | 0.0677  | 0.1027  | 0.9185   |
|                                                                 | Age                                 | -0.0048  | -0.0100  | 0.0004    | 0.0026  | -1.8328 | 0.0713   |
| Group_Batch1                                                    | 0.0827                              | -0.0460  | 0.2114   | 0.0645    | 1.2824  | 0.2042  |          |
| figure 4C<br>(Finegoldia vs IL-<br>6)<br>removing 2<br>outliers | Intercept                           | 0.3394   | 0.0250   | 0.6539    | 0.1575  | 2.1553  | 0.0348   |
|                                                                 | IL-6                                | 0.0001   | 0.0000   | 0.0002    | 0.0000  | 2.4865  | 0.0154   |
|                                                                 | Case.controlControl                 | -0.1215  | -0.2377  | -0.0052   | 0.0582  | -2.0867 | 0.0408   |
|                                                                 | SexM                                | -0.0046  | -0.1233  | 0.1141    | 0.0595  | -0.0772 | 0.9387   |
|                                                                 | Age                                 | -0.0044  | -0.0090  | 0.0001    | 0.0023  | -1.9500 | 0.0554   |
| Group_Batch1                                                    | 0.1243                              | 0.0105   | 0.2381   | 0.0570    | 2.1799  | 0.0328  |          |
| figure 5A<br>(Shannon vs<br>Outcome)                            | Intercept                           | 2.6420   | 1.6641   | 3.6199    | 0.4923  | 5.3666  | 0.0000   |
|                                                                 | Non-survivor                        | -0.2470  | -0.6580  | 0.1640    | 0.2069  | -1.1939 | 0.2356   |
|                                                                 | Case.controlControl                 | 0.6191   | 0.2491   | 0.9892    | 0.1863  | 3.3234  | 0.0013   |
|                                                                 | SexM                                | -0.1834  | -0.5577  | 0.1910    | 0.1885  | -0.9730 | 0.3331   |
|                                                                 | Age                                 | -0.0043  | -0.0180  | 0.0093    | 0.0069  | -0.6314 | 0.5294   |
| Group_Batch1                                                    | -0.3698                             | -0.7201  | -0.0194  | 0.1764    | -2.0965 | 0.0388  |          |
| figure S1B<br>(Delftia vs<br>disease)<br>removing 1 outlier     | Intercept                           | 0.4254   | -0.1040  | 0.9548    | 0.2662  | 1.5981  | 0.1138   |
|                                                                 | Disease_Allo-HSCT                   | -0.0214  | -0.2594  | 0.2167    | 0.01197 | -0.1787 | 0.8586   |
|                                                                 | Disease_COPD                        | 0.1391   | -0.4759  | 0.7541    | 0.3092  | 0.4498  | 0.6540   |
|                                                                 | Disease_Chronic<br>lymph... disease | -0.0773  | -0.3523  | 0.1977    | 0.1383  | -0.5589 | 0.5778   |
|                                                                 | Disease_AML                         | -0.6013  | -1.5066  | 0.3040    | 0.4552  | -1.3212 | 0.1901   |
|                                                                 | Disease_Influenza                   | -0.0636  | -0.4086  | 0.2814    | 0.1734  | -0.3665 | 0.7149   |
|                                                                 | Disease_Cirrhosis                   | -0.3561  | -0.7664  | 0.0542    | 0.2063  | -1.7262 | 0.0880   |
|                                                                 | Disease_Solid<br>tumor              | 0.2608   | -0.1531  | 0.6747    | 0.2081  | 1.2532  | 0.2137   |



|                                                             |                            |           |          |          |          |         |        |
|-------------------------------------------------------------|----------------------------|-----------|----------|----------|----------|---------|--------|
|                                                             | <b>Disease_SOT</b>         | -0.1163   | -0.4612  | 0.2286   | 0.1734   | -0.6707 | 0.5043 |
|                                                             | <b>Case.controlControl</b> | 0.0876    | -0.0954  | 0.2707   | 0.0920   | 0.9521  | 0.3438 |
|                                                             | <b>SexM</b>                | 0.0233    | -0.1599  | 0.2065   | 0.0921   | 0.2532  | 0.8007 |
|                                                             | <b>Age</b>                 | -0.0067   | -0.0142  | 0.0008   | 0.0038   | -1.7823 | 0.0784 |
|                                                             | <b>Group_Batch1</b>        | 0.3634    | 0.1770   | 0.5498   | 0.0937   | 3.8773  | 0.0002 |
| <b>figure S2A<br/>(Shannon vs<br/>β.lactam)</b>             | <b>Intercept</b>           | 2.7828    | 1.8249   | 3.7407   | 0.4822   | 5.7706  | 0.0000 |
|                                                             | <b>β.lactamYes</b>         | -0.4431   | -0.8445  | -0.0418  | 0.2021   | -2.1931 | 0.0309 |
|                                                             | <b>Case.controlControl</b> | 0.5989    | 0.2439   | 0.9539   | 0.1787   | 3.3509  | 0.0012 |
|                                                             | <b>SexM</b>                | -0.0911   | -0.4568  | 0.2747   | 0.1841   | -0.4945 | 0.6221 |
|                                                             | <b>Age</b>                 | -0.0047   | 0.0181   | 0.0086   | 0.0067   | -0.7076 | 0.4810 |
|                                                             | <b>Group_Batch1</b>        | -0.3999   | -0.7456  | -0.0543  | 0.1740   | -2.2982 | 0.0238 |
| <b>figure S2B<br/>(Prevotella vs β-<br/>lactam)</b>         | <b>Intercept</b>           | -1.4241   | -7.2511  | 4.4029   | 2.9335   | -0.4855 | 0.6285 |
|                                                             | <b>β.lactamYes</b>         | -2.7435   | -5.1852  | -0.3019  | 1.2292   | -2.2320 | 0.0281 |
|                                                             | <b>Case.controlControl</b> | 4.6860    | 2.5266   | 6.8455   | 1.0871   | 4.3104  | 0.0000 |
|                                                             | <b>SexM</b>                | -0.9635   | -3.1884  | 1.2615   | 1.1201   | -0.8602 | 0.3920 |
|                                                             | <b>Age</b>                 | 0.0963    | 0.0152   | 0.1773   | 0.0408   | 2.3600  | 0.0204 |
|                                                             | <b>Group_Batch1</b>        | -1.5219   | -3.6246  | 0.5809   | 1.0586   | -1.4376 | 0.1540 |
| <b>figure S2C<br/>(Prevotella vs<br/>Age)</b>               | <b>Intercept</b>           | -3.4495   | -9.1086  | 2.2095   | 2.8493   | -1.2106 | 0.2291 |
|                                                             | <b>Age</b>                 | 0.0935    | 0.0108   | 0.1762   | 0.0416   | 2.2455  | 0.0271 |
|                                                             | <b>Case.controlControl</b> | 5.2360    | 3.0881   | 7.3840   | 1.0815   | 4.8414  | 0.0000 |
|                                                             | <b>SexM</b>                | -1.3003   | -3.5518  | 0.9512   | 1.1336   | -1.1470 | 0.2543 |
|                                                             | <b>Group_Batch1</b>        | -1.2477   | -3.3807  | 0.8852   | 1.0740   | -1.1618 | 0.2483 |
| <b>figure S3A<br/>(Shannon vs<br/>Neutrophils)</b>          | <b>Intercept</b>           | 2.3540    | 1.4027   | 3.3052   | 0.4784   | 4.9203  | 0.0000 |
|                                                             | <b>Neutrophils</b>         | 0.0000    | -0.0001  | 0.0000   | 0.0000   | -1.1187 | 0.2664 |
|                                                             | <b>Case.controlControl</b> | 0.6166    | 0.2522   | 0.9811   | 0.1833   | 3.3643  | 0.0012 |
|                                                             | <b>SexM</b>                | -0.1925   | -0.5767  | 0.1916   | 0.1932   | -0.9966 | 0.3218 |
|                                                             | <b>Age</b>                 | -0.0010   | -0.0154  | 0.0134   | 0.0073   | -0.1375 | 0.8909 |
|                                                             | <b>Group_Batch1</b>        | -0.2994   | -0.6657  | 0.0669   | 0.1842   | -1.6251 | 0.1078 |
| <b>figure S3A<br/>(Shannon vs<br/>Lymphocytes)</b>          | <b>Intercept</b>           | 2.3778    | 1.4292   | 3.3264   | 0.4773   | 4.9821  | 0.0000 |
|                                                             | <b>Lymphocytes</b>         | 0.0000    | -0.0001  | 0.0001   | 0.0001   | -0.1156 | 0.9083 |
|                                                             | <b>Case.controlControl</b> | 0.6376    | 0.2747   | 1.0006   | 0.1826   | 3.4916  | 0.0008 |
|                                                             | <b>SexM</b>                | -0.1900   | -0.5780  | 0.1979   | 0.1952   | -0.9736 | 0.3329 |
|                                                             | <b>Age</b>                 | -0.0026   | -0.0167  | 0.0116   | 0.0071   | -0.3606 | 0.7193 |
|                                                             | <b>Group_Batch1</b>        | -0.3316   | -0.6965  | 0.0333   | 0.1836   | -1.8061 | 0.0744 |
| <b>figure S3B<br/>(unclassified.Phy<br/>vs Neutrophils)</b> | <b>Intercept</b>           | 1.2573    | -4.2322  | 6.7468   | 2.7610   | 0.4554  | 0.6500 |
|                                                             | <b>Neutrophils</b>         | 0.0006    | 0.0003   | 0.0009   | 0.0001   | 4.1931  | 0.0001 |
|                                                             | <b>Case.controlControl</b> | -1.8616   | -3.9647  | 0.2415   | 1.0578   | -1.7599 | 0.0820 |
|                                                             | <b>SexM</b>                | 1.2640    | -0.9529  | 3.4809   | 1.1150   | 1.1336  | 0.2601 |
|                                                             | <b>Age</b>                 | -0.0016   | -0.0849  | 0.0818   | 0.0419   | -0.0377 | 0.9700 |
|                                                             | <b>Group_Batch1</b>        | -3.1424   | -5.2563  | -1.0284  | 1.0632   | -2.9556 | 0.0040 |
| <b>figure S4 (See results for figure 4)</b>                 |                            |           |          |          |          |         |        |
| <b>Figure S5 (Time<br/>to death vs<br/>Case.control)</b>    | <b>Intercept</b>           | 489.1053  | 40.2535  | 937.9571 | 225.9981 | 2.1642  | 0.0330 |
|                                                             | <b>Case.controlControl</b> | 253.2282  | 82.8585  | 423.5970 | 85.7812  | 2.9520  | 0.0040 |
|                                                             | <b>SexM</b>                | 71.1949   | -107.385 | 249.7750 | 89.9156  | 0.7918  | 0.4305 |
|                                                             | <b>Age</b>                 | -3.0868   | -9.6476  | 3.4740   | 3.3034   | -0.9344 | 0.3525 |
|                                                             | <b>Group_Batch1</b>        | -116.4242 | -285.603 | 52.7542  | 85.1818  | -1.3668 | 0.1750 |

---

| Survival analyses                    | Hazard ratio | Estimate CI (2.5) | Estimate CI (97.5) | Pr(> z ) |
|--------------------------------------|--------------|-------------------|--------------------|----------|
| Cases_only.Shannon_range.Low_High    | 4.195        | 0.2921            | 2.5757             | 0.0138   |
| Controls_only.Shannon_range.Low_High | 1.2647       | -0.8881           | 1.3578             | 0.6819   |

---

## Supplementary File 3

bray

|         | UZ.P066     | UZ.P067     | UZ.P068 | UZ.P069     | UZ.P070     | UZ.P071     | UZ.P072     | UZ.P073     |
|---------|-------------|-------------|---------|-------------|-------------|-------------|-------------|-------------|
| UZ.P066 | NA          |             |         |             |             |             |             |             |
| UZ.P067 | 0.695134751 | NA          |         |             |             |             |             |             |
| UZ.P068 | 0.959231664 | 0.986768614 | NA      |             |             |             |             |             |
| UZ.P069 | 0.813583466 |             |         | 0.966559196 | NA          |             |             |             |
| UZ.P070 | 0.750458136 | 0.573601544 |         | 0.992317686 | 0.948167785 | NA          |             |             |
| UZ.P071 | 0.510407534 | 0.807498437 |         | 0.960992452 | 0.766610582 | 0.835533109 | NA          |             |
| UZ.P072 | 0.868336868 | 0.945429904 |         | 0.981620633 | 0.91945174  | 0.960444635 | 0.833069086 | NA          |
| UZ.P073 | 0.62512177  | 0.749553843 |         | 0.921346051 | 0.836047624 | 0.787374191 | 0.464780934 | 0.842624534 |
| UZ.P074 | 0.67449833  | 0.420844633 |         | 0.990349664 | 0.943430087 | 0.510827871 | 0.820396667 | 0.956623431 |
| UZ.P056 | 0.886731722 | 0.930350627 |         | 0.961579105 | 0.912675675 | 0.958331983 | 0.722485186 | 0.90055898  |
| UZ.P075 | 0.774736307 | 0.840865914 |         | 0.810874581 | 0.854314912 | 0.873100795 | 0.605913195 | 0.84345177  |
| UZ.P076 | 0.621991295 | 0.904383256 |         | 0.610425311 | 0.812524467 | 0.92009105  | 0.584851858 | 0.876158774 |
| UZ.P077 | 0.365612926 | 0.903674735 |         | 0.967918667 | 0.810833047 | 0.925598122 | 0.473185475 | 0.848298545 |
| UZ.P079 | 0.862314461 | 0.949495139 |         | 0.994339524 | 0.971024502 | 0.947960012 | 0.871260178 | 0.959977929 |
| UZ.P080 | 0.941800432 | 0.956625785 |         | 0.974306137 | 0.950919995 | 0.97955131  | 0.894703566 | 0.958735246 |
| UZ.P081 | 0.439282758 | 0.89528576  |         | 0.967689969 | 0.819216782 | 0.910147337 | 0.451823947 | 0.869800049 |
| UZ.P083 | 0.913880024 | 0.981367945 |         | 0.942918406 | 0.951280064 | 0.991658498 | 0.914142163 | 0.963468152 |
| UZ.P084 | 0.911172363 | 0.96821244  |         | 0.59804297  | 0.925424164 | 0.980586096 | 0.845975282 | 0.945214841 |
| UZ.P085 | 0.900885258 | 0.88370606  |         | 0.950852351 | 0.915477085 | 0.910183261 | 0.777746754 | 0.934015911 |
| UZ.P057 | 0.698767078 | 0.619286725 |         | 0.812420584 | 0.925557433 | 0.724619666 | 0.822732849 | 0.955017059 |
| UZ.P086 | 0.898004587 | 0.990795924 |         | 0.893732092 | 0.959754479 | 0.990627547 | 0.80768023  | 0.964876084 |
| UZ.P087 | 0.938805056 | 0.864595034 |         | 0.99551072  | 0.95699413  | 0.900128202 | 0.919977713 | 0.918043391 |
| UZ.P089 | 0.994670323 | 0.991185104 |         | 0.988520022 | 0.994151587 | 0.992432999 | 0.979828929 | 0.993634539 |
| UZ.P091 | 0.994018607 | 0.991313409 |         | 0.992456444 | 0.994973231 | 0.992822377 | 0.986525505 | 0.993547888 |
| UZ.P092 | 0.985219308 | 0.974316302 |         | 0.986534495 | 0.985804494 | 0.981863698 | 0.960523643 | 0.990135518 |
| UZ.P093 | 0.474338343 | 0.702070233 |         | 0.953922237 | 0.793237748 | 0.730174043 | 0.502826623 | 0.825498821 |
| UZ.P094 | 0.783525962 | 0.62778316  |         | 0.989255603 | 0.93844436  | 0.488733861 | 0.867766459 | 0.944934972 |
| UZ.P095 | 0.859357828 | 0.855120787 |         | 0.968528305 | 0.917392259 | 0.902805219 | 0.819309789 | 0.906858298 |
| UZ.P096 | 0.598386716 | 0.804687572 |         | 0.597582054 | 0.865785462 | 0.789152959 | 0.651976688 | 0.854834272 |
| UZ.P097 | 0.633165731 | 0.825172174 |         | 0.958669605 | 0.820623325 | 0.816260725 | 0.562240867 | 0.838420545 |
| UZ.P058 | 0.487738702 | 0.590275075 |         | 0.960804488 | 0.833996461 | 0.630179135 | 0.583863125 | 0.886047389 |
| UZ.P098 | 0.88679452  | 0.998246772 |         | 0.948214884 | 0.977490935 | 0.997872094 | 0.865858172 | 0.967645402 |
| UZ.P099 | 0.710387841 | 0.627867475 |         | 0.952430147 | 0.873935943 | 0.621848059 | 0.65448112  | 0.891148618 |
| UZ.P100 | 0.694755202 | 0.855109765 |         | 0.977458106 | 0.892522895 | 0.885285898 | 0.663080081 | 0.879102933 |
| UZ.P101 | 0.867569468 | 0.709423481 |         | 0.987634498 | 0.94081567  | 0.574879513 | 0.842770027 | 0.944672185 |
| UZ.P102 | 0.939356313 | 0.86946312  |         | 0.989667021 | 0.958422122 | 0.858954462 | 0.918068833 | 0.958399676 |
| UZ.P103 | 0.743867985 | 0.529952314 |         | 0.996346965 | 0.948659107 | 0.434611026 | 0.848225426 | 0.960852451 |
| UZ.P104 | 0.601594487 | 0.734554132 |         | 0.972059813 | 0.862329345 | 0.721725537 | 0.626613119 | 0.849705988 |
| UZ.P105 | 0.718007432 | 0.565202073 |         | 0.988158824 | 0.941108198 | 0.487403037 | 0.84628283  | 0.948135947 |
| UZ.P106 | 0.574767226 | 0.705411171 |         | 0.979066654 | 0.872362822 | 0.701371746 | 0.574397801 | 0.869380966 |
| UZ.P107 | 0.772180253 | 0.62847178  |         | 0.993852742 | 0.94995493  | 0.460928593 | 0.862125553 | 0.963593261 |
| UZ.P108 | 0.699615997 | 0.579190316 |         | 0.996868911 | 0.951027107 | 0.40145991  | 0.845410226 | 0.965825838 |
| UZ.P110 | 0.849430069 | 0.676952274 |         | 0.996200241 | 0.956358211 | 0.677671261 | 0.865836124 | 0.965067509 |
| UZ.P111 | 0.682029693 | 0.428032407 |         | 0.99208117  | 0.941752482 | 0.485464666 | 0.847966069 | 0.953909167 |
| UZ.P112 | 0.941356006 | 0.95160675  |         | 0.944493843 | 0.951131106 | 0.975138281 | 0.872633535 | 0.96371271  |
| UZ.P113 | 0.688159237 | 0.609673469 |         | 0.994119885 | 0.952005431 | 0.636762557 | 0.866234738 | 0.963772797 |
| UZ.P114 | 0.713458022 | 0.63853759  |         | 0.987970113 | 0.950894842 | 0.609646887 | 0.870519509 | 0.962332944 |
| UZ.P065 | 0.960651331 | 0.961647984 |         | 0.956660526 | 0.966328261 | 0.978914367 | 0.882643462 | 0.967451568 |
| UZ.P061 | 0.484519898 | 0.845722034 |         | 0.972215041 | 0.808734789 | 0.874317057 | 0.590230231 | 0.885571915 |
| UZ.P063 | 0.976186007 | 0.973261441 |         | 0.966724365 | 0.977810536 | 0.988741443 | 0.914350431 | 0.978815887 |
| UZ.P064 | 0.384017551 | 0.600161214 |         | 0.953417525 | 0.80532328  | 0.692858664 | 0.447337874 | 0.84851261  |
| UZ.P124 | 0.797543851 | 0.930482172 |         | 0.912044008 | 0.965770822 | 0.976830592 | 0.739337859 | 0.960852091 |
| UZ.P127 | 0.962803981 | 0.986422687 |         | 0.977259622 | 0.973880716 | 0.992982    | 0.947876489 | 0.985552764 |
| UZ.P128 | 0.800509267 | 0.984139065 |         | 0.984300856 | 0.974954639 | 0.992960818 | 0.7097624   | 0.961555893 |
| UZ.P129 | 0.993804848 | 0.99573321  |         | 0.992168164 | 0.994656774 | 0.997264398 | 0.985747659 | 0.995647329 |
| UZ.P130 | 0.991639821 | 0.988795232 |         | 0.992850631 | 0.992445518 | 0.992632165 | 0.981440006 | 0.993311719 |
| UZ.P131 | 0.962371548 | 0.993340359 |         | 0.85927683  | 0.969259662 | 0.99663806  | 0.965090815 | 0.991366877 |
| UZ.P132 | 0.998281376 | 0.998210867 |         | 0.997197242 | 0.998461034 | 0.998166494 | 0.994762627 | 0.998382385 |
| UZ.P133 | 0.839354473 | 0.905265471 |         | 0.918516742 | 0.881690183 | 0.979532723 | 0.715753092 | 0.815591313 |
| UZ.P115 | 0.949250827 | 0.989320885 |         | 0.923174738 | 0.956206519 | 0.991588101 | 0.936484734 | 0.985073147 |
| UZ.P134 | 0.916503125 | 0.896481874 |         | 0.973907342 | 0.940519797 | 0.935708335 | 0.869714572 | 0.955067602 |
| UZ.P135 | 0.991609505 | 0.998168713 |         | 0.992961671 | 0.995709419 | 0.997060879 | 0.986629649 | 0.995563064 |
| UZ.P136 | 0.797855488 | 0.67010731  |         | 0.979809818 | 0.945128583 | 0.703857029 | 0.79539405  | 0.964212645 |
| UZ.P137 | 0.996264917 | 0.995031159 |         | 0.993381879 | 0.995752207 | 0.9968088   | 0.988526648 | 0.996571717 |
| UZ.P138 | 0.929019877 | 0.922308979 |         | 0.971105031 | 0.97110228  | 0.868868585 | 0.912537453 | 0.973030122 |
| UZ.P139 | 0.85772685  | 0.599059683 |         | 0.995145918 | 0.935948951 | 0.748715886 | 0.80347842  | 0.954017686 |
| UZ.P140 | 0.864670615 | 0.641131203 |         | 0.993931259 | 0.936733847 | 0.709855556 | 0.796196943 | 0.955918983 |
| UZ.P141 | 0.86714723  | 0.643864631 |         | 0.993062327 | 0.935105828 | 0.853390576 | 0.820868139 | 0.9534563   |
| UZ.P142 | 0.871051956 | 0.870692753 |         | 0.974394147 | 0.926989325 | 0.884906644 | 0.811711412 | 0.81976687  |
| UZ.P143 | 0.835126147 | 0.997611073 |         | 0.986559952 | 0.99018437  | 0.99684612  | 0.793524988 | 0.978160962 |
| UZ.P116 | 0.911919203 | 0.981587539 |         | 0.377664743 | 0.959444575 | 0.994853787 | 0.921532341 | 0.960775198 |
| UZ.P144 | 0.869852396 | 0.845216065 |         | 0.981053188 | 0.961385186 | 0.887428792 | 0.857918119 | 0.919962105 |
| UZ.P145 | 0.914391775 | 0.988589757 |         | 0.933721923 | 0.956980044 | 0.998581858 | 0.896165232 | 0.970678733 |
| UZ.P146 | 0.887845234 | 0.67398983  |         | 0.995992096 | 0.938450296 | 0.772832747 | 0.831127188 | 0.953885316 |
| UZ.P147 | 0.958565485 | 0.962871578 |         | 0.996264274 | 0.975651145 | 0.968113144 | 0.941997509 | 0.979461451 |
| UZ.P148 | 0.95300409  | 0.962201018 |         | 0.979752635 | 0.973998584 | 0.973148024 | 0.923412909 | 0.976823212 |
| UZ.P149 | 0.95787772  | 0.97238252  |         | 0.990795228 | 0.977399177 | 0.977331734 | 0.948038168 | 0.976361601 |
| UZ.P150 | 0.995084563 | 0.992706728 |         | 0.995560213 | 0.995158278 | 0.995108289 | 0.985707533 | 0.99618471  |
| UZ.P151 | 0.982678303 | 0.994893774 |         | 0.983457557 | 0.989674596 | 0.994552627 | 0.958513661 | 0.987247202 |
| UZ.P152 | 0.84340572  | 0.829614554 |         | 0.974186894 | 0.929525223 | 0.801044041 | 0.82767526  | 0.9393477   |
| UZ.P153 | 0.920245822 | 0.974980787 |         | 0.987269958 | 0.96386675  | 0.98738643  | 0.898854046 | 0.976112758 |
| UZ.P117 | 0.81916125  | 0.99082251  |         | 0.735574147 | 0.962499393 | 0.991646027 | 0.750873284 | 0.970496709 |
| UZ.P154 | 0.886782898 | 0.80083292  |         | 0.884115808 | 0.938430424 | 0.885744606 | 0.88153547  | 0.965347013 |
| UZ.P155 | 0.814727826 | 0.902935848 |         | 0.987265716 | 0.965359242 | 0.836718141 | 0.684238497 | 0.958982137 |
| UZ.P156 | 0.708681255 | 0.632509945 |         | 0.967740523 | 0.93211972  | 0.689865377 | 0.759251915 | 0.906537114 |
| UZ.P157 | 0.934950128 | 0.986742977 |         | 0.977193054 | 0.973652447 | 0.99361078  | 0.89580239  | 0.957361557 |
| UZ.P158 | 0.938759946 | 0.990599226 |         | 0.962171133 | 0.971253597 | 0.994879967 | 0.926465215 | 0.709729327 |
| UZ.P159 | 0.945861233 | 0.939214997 |         | 0.986295356 | 0.96442773  | 0.95751493  | 0.886371586 | 0.966120582 |
| UZ.P160 | 0.929255806 | 0.853428545 |         | 0.987844539 | 0.957566886 | 0.894349208 | 0.902745989 | 0.961093263 |
| UZ.P161 | 0.776240846 | 0.876152596 |         | 0.980181606 | 0.957060834 | 0.891869624 | 0.642341964 | 0.940272602 |
| UZ.P162 | 0.852040624 | 0.69656997  |         | 0.830212066 | 0.917729794 | 0.783947657 | 0.7576269   | 0.951546981 |
| UZ.P163 | 0.966275938 | 0.984572044 |         | 0.937572361 | 0.965612626 | 0.995320488 | 0.952333707 | 0.988044456 |
| UZ.P164 | 0.946404611 | 0.915182664 |         | 0.981010674 | 0.954561165 | 0.945406259 | 0.908907576 | 0.976055863 |
| UZ.P119 | 0.928479589 | 0.983513068 |         | 0.980662867 | 0.972561366 | 0.995724094 | 0.873264076 | 0.943349848 |
| UZ.P120 | 0.914591585 | 0.930054615 |         | 0.801473003 | 0.944605981 | 0.938495392 | 0.854669677 | 0.873461376 |
|         |             |             |         |             |             |             |             |             |



bray

| UZ.P083     | UZ.P084     | UZ.P085     | UZ.P057     | UZ.P086     | UZ.P087     | UZ.P089     | UZ.P091     |
|-------------|-------------|-------------|-------------|-------------|-------------|-------------|-------------|
| 0.913880024 | 0.911172363 | 0.900885258 | 0.698767078 | 0.898004587 | 0.938805056 | 0.994670323 | 0.994018607 |
| 0.981367945 | 0.96821244  | 0.88370606  | 0.619286725 | 0.990795924 | 0.864595034 | 0.991185104 | 0.991313409 |
| 0.942918406 | 0.59804297  | 0.950852351 | 0.812420584 | 0.893732092 | 0.99551072  | 0.988520022 | 0.992456444 |
| 0.951280064 | 0.925424164 | 0.915477085 | 0.925557433 | 0.959754479 | 0.95699413  | 0.994151587 | 0.994973231 |
| 0.991658498 | 0.980586096 | 0.910183261 | 0.724619666 | 0.990627547 | 0.900128202 | 0.992432999 | 0.992822377 |
| 0.914142163 | 0.845975282 | 0.777746754 | 0.822732849 | 0.80768023  | 0.919977713 | 0.979828929 | 0.886525505 |
| 0.963468152 | 0.945214841 | 0.934015911 | 0.955017059 | 0.964876084 | 0.961669732 | 0.993634539 | 0.993547888 |
| 0.878040433 | 0.782104292 | 0.778054323 | 0.687649665 | 0.715968255 | 0.918043391 | 0.977340946 | 0.984789128 |
| 0.990129023 | 0.981172251 | 0.871255335 | 0.482809347 | 0.987519627 | 0.870228285 | 0.994312708 | 0.990397885 |
| 0.883372068 | 0.799834371 | 0.799834371 | 0.921561991 | 0.810918229 | 0.963241004 | 0.93449567  | 0.971035263 |
| 0.864801624 | 0.528914639 | 0.765124449 | 0.722327427 | 0.706887731 | 0.888719606 | 0.965885746 | 0.978355386 |
| 0.935678313 | 0.644429876 | 0.881922512 | 0.790175738 | 0.88475312  | 0.949059437 | 0.993874533 | 0.993993575 |
| 0.922908556 | 0.905459002 | 0.873238573 | 0.900436591 | 0.88982269  | 0.946310179 | 0.989310574 | 0.993853005 |
| 0.982068284 | 0.985669888 | 0.96323863  | 0.967126254 | 0.941919708 | 0.961003963 | 0.996710551 | 0.996688539 |
| 0.947270702 | 0.890874159 | 0.933984126 | 0.962458526 | 0.962597988 | 0.708331928 | 0.968502503 | 0.987381589 |
| 0.927929416 | 0.889994263 | 0.864794793 | 0.868703159 | 0.874632832 | 0.960200483 | 0.987368576 | 0.988702815 |
| NA          | 0.897028834 | 0.928279001 | 0.931128926 | 0.874540665 | 0.995631369 | 0.97905548  | 0.987321073 |
| NA          | 0.897028834 | NA          | 0.694729269 | 0.741390001 | 0.98705748  | 0.956375261 | 0.979233658 |
| NA          | 0.84192465  | NA          | 0.827718592 | 0.826573818 | 0.902644264 | 0.89375112  | 0.921207979 |
| NA          | 0.694729269 | 0.827718592 | NA          | 0.869251326 | 0.949055181 | 0.980211112 | 0.989134396 |
| NA          | 0.741390001 | 0.741390001 | NA          | 0.869251326 | 0.991945811 | 0.996723102 | 0.947976879 |
| NA          | 0.98705748  | 0.98705748  | 0.869251326 | NA          | 0.994905181 | 0.996723102 | 0.99361921  |
| NA          | 0.98705748  | 0.98705748  | 0.869251326 | NA          | 0.991945811 | 0.996723102 | 0.99361921  |
| NA          | 0.84192465  | NA          | 0.827718592 | 0.826573818 | 0.902644264 | 0.89375112  | 0.921207979 |
| NA          | 0.694729269 | 0.827718592 | NA          | 0.869251326 | 0.949055181 | 0.980211112 | 0.989134396 |
| NA          | 0.741390001 | 0.741390001 | NA          | 0.869251326 | 0.991945811 | 0.996723102 | 0.947976879 |
| NA          | 0.98705748  | 0.98705748  | 0.869251326 | NA          | 0.994905181 | 0.996723102 | 0.99361921  |
| NA          | 0.98705748  | 0.98705748  | 0.869251326 | NA          | 0.991945811 | 0.996723102 | 0.99361921  |
| NA          | 0.84192465  | NA          | 0.827718592 | 0.826573818 | 0.902644264 | 0.89375112  | 0.921207979 |
| NA          | 0.694729269 | 0.827718592 | NA          | 0.869251326 | 0.949055181 | 0.980211112 | 0.989134396 |
| NA          | 0.741390001 | 0.741390001 | NA          | 0.869251326 | 0.991945811 | 0.996723102 | 0.947976879 |
| NA          | 0.98705748  | 0.98705748  | 0.869251326 | NA          | 0.994905181 | 0.996723102 | 0.99361921  |
| NA          | 0.98705748  | 0.98705748  | 0.869251326 | NA          | 0.991945811 | 0.996723102 | 0.99361921  |
| 0.981367945 | 0.96821244  | 0.88370606  | 0.619286725 | 0.990795924 | 0.864595034 | 0.991185104 | 0.991313409 |
| 0.942918406 | 0.59804297  | 0.950852351 | 0.812420584 | 0.893732092 | 0.99551072  | 0.988520022 | 0.992456444 |
| 0.951280064 | 0.925424164 | 0.915477085 | 0.925557433 | 0.959754479 | 0.95699413  | 0.994151587 | 0.994973231 |
| 0.991658498 | 0.980586096 | 0.910183261 | 0.724619666 | 0.990627547 | 0.900128202 | 0.992432999 | 0.992822377 |
| 0.914142163 | 0.845975282 | 0.777746754 | 0.822732849 | 0.80768023  | 0.919977713 | 0.979828929 | 0.886525505 |
| 0.963468152 | 0.945214841 | 0.934015911 | 0.955017059 | 0.964876084 | 0.961669732 | 0.993634539 | 0.993547888 |
| 0.878040433 | 0.782104292 | 0.778054323 | 0.687649665 | 0.715968255 | 0.918043391 | 0.977340946 | 0.984789128 |
| 0.990129023 | 0.981172251 | 0.871255335 | 0.482809347 | 0.987519627 | 0.870228285 | 0.994312708 | 0.990397885 |
| 0.883372068 | 0.799834371 | 0.799834371 | 0.921561991 | 0.810918229 | 0.963241004 | 0.93449567  | 0.971035263 |
| 0.864801624 | 0.528914639 | 0.765124449 | 0.722327427 | 0.706887731 | 0.888719606 | 0.965885746 | 0.978355386 |
| 0.935678313 | 0.644429876 | 0.881922512 | 0.790175738 | 0.88475312  | 0.949059437 | 0.993874533 | 0.993993575 |
| 0.922908556 | 0.905459002 | 0.873238573 | 0.900436591 | 0.88982269  | 0.946310179 | 0.989310574 | 0.993853005 |
| 0.982068284 | 0.985669888 | 0.96323863  | 0.967126254 | 0.941919708 | 0.961003963 | 0.996710551 | 0.996688539 |
| 0.947270702 | 0.890874159 | 0.933984126 | 0.962458526 | 0.962597988 | 0.708331928 | 0.968502503 | 0.987381589 |
| 0.927929416 | 0.889994263 | 0.864794793 | 0.868703159 | 0.874632832 | 0.960200483 | 0.987368576 | 0.988702815 |
| NA          | 0.897028834 | 0.928279001 | 0.931128926 | 0.874540665 | 0.995631369 | 0.97905548  | 0.987321073 |
| NA          | 0.897028834 | NA          | 0.694729269 | 0.741390001 | 0.98705748  | 0.956375261 | 0.979233658 |
| NA          | 0.84192465  | NA          | 0.827718592 | 0.826573818 | 0.902644264 | 0.89375112  | 0.921207979 |
| NA          | 0.694729269 | 0.827718592 | NA          | 0.869251326 | 0.949055181 | 0.980211112 | 0.989134396 |
| NA          | 0.741390001 | 0.741390001 | NA          | 0.869251326 | 0.991945811 | 0.996723102 | 0.947976879 |
| NA          | 0.98705748  | 0.98705748  | 0.869251326 | NA          | 0.994905181 | 0.996723102 | 0.99361921  |
| NA          | 0.98705748  | 0.98705748  | 0.869251326 | NA          | 0.991945811 | 0.996723102 | 0.99361921  |
| 0.981367945 | 0.96821244  | 0.88370606  | 0.619286725 | 0.990795924 | 0.864595034 | 0.991185104 | 0.991313409 |
| 0.942918406 | 0.59804297  | 0.950852351 | 0.812420584 | 0.893732092 | 0.99551072  | 0.988520022 | 0.992456444 |
| 0.951280064 | 0.925424164 | 0.915477085 | 0.925557433 | 0.959754479 | 0.95699413  | 0.994151587 | 0.994973231 |
| 0.991658498 | 0.980586096 | 0.910183261 | 0.724619666 | 0.990627547 | 0.900128202 | 0.992432999 | 0.992822377 |
| 0.914142163 | 0.845975282 | 0.777746754 | 0.822732849 | 0.80768023  | 0.919977713 | 0.979828929 | 0.886525505 |
| 0.963468152 | 0.945214841 | 0.934015911 | 0.955017059 | 0.964876084 | 0.961669732 | 0.993634539 | 0.993547888 |
| 0.878040433 | 0.782104292 | 0.778054323 | 0.687649665 | 0.715968255 | 0.918043391 | 0.977340946 | 0.984789128 |
| 0.990129023 | 0.981172251 | 0.871255335 | 0.482809347 | 0.987519627 | 0.870228285 | 0.994312708 | 0.990397885 |
| 0.883372068 | 0.799834371 | 0.799834371 | 0.921561991 | 0.810918229 | 0.963241004 | 0.93449567  | 0.971035263 |
| 0.864801624 | 0.528914639 | 0.765124449 | 0.722327427 | 0.706887731 | 0.888719606 | 0.965885746 | 0.978355386 |
| 0.935678313 | 0.644429876 | 0.881922512 | 0.790175738 | 0.88475312  | 0.949059437 | 0.993874533 | 0.993993575 |
| 0.922908556 | 0.905459002 | 0.873238573 | 0.900436591 | 0.88982269  | 0.946310179 | 0.989310574 | 0.993853005 |
| 0.982068284 | 0.985669888 | 0.96323863  | 0.967126254 | 0.941919708 | 0.961003963 | 0.996710551 | 0.996688539 |
| 0.947270702 | 0.890874159 | 0.933984126 | 0.962458526 | 0.962597988 | 0.708331928 | 0.968502503 | 0.987381589 |
| 0.927929416 | 0.889994263 | 0.864794793 | 0.868703159 | 0.874632832 | 0.960200483 | 0.987368576 | 0.988702815 |
| NA          | 0.897028834 | 0.928279001 | 0.931128926 | 0.874540665 | 0.995631369 | 0.97905548  | 0.987321073 |
| NA          | 0.897028834 | NA          | 0.694729269 | 0.741390001 | 0.98705748  | 0.956375261 | 0.979233658 |
| NA          | 0.84192465  | NA          | 0.827718592 | 0.826573818 | 0.902644264 | 0.89375112  | 0.921207979 |
| NA          | 0.694729269 | 0.827718592 | NA          | 0.869251326 | 0.949055181 | 0.980211112 | 0.989134396 |
| NA          | 0.741390001 | 0.741390001 | NA          | 0.869251326 | 0.991945811 | 0.996723102 | 0.947976879 |
| NA          | 0.98705748  | 0.98705748  | 0.869251326 | NA          | 0.994905181 | 0.996723102 | 0.99361921  |
| NA          | 0.98705748  | 0.98705748  | 0.869251326 | NA          | 0.991945811 | 0.996723102 | 0.99361921  |









bray

| UZ.P061        | UZ.P063        | UZ.P064        | UZ.P124        | UZ.P127        | UZ.P128        | UZ.P129        | UZ.P130        |
|----------------|----------------|----------------|----------------|----------------|----------------|----------------|----------------|
| 0.484519898    | 0.976186007    | 0.384017551    | 0.797543851    | 0.962803981    | 0.800509267    | 0.993804848    | 0.991639821    |
| 0.845722034    | 0.973261441    | 0.600161214    | 0.930482172    | 0.986422687    | 0.984139065    | 0.99573321     | 0.988795232    |
| 0.972215041    | 0.966724365    | 0.953417525    | 0.912044008    | 0.972759622    | 0.984300856    | 0.992168164    | 0.992850631    |
| 0.808734789    | 0.977810536    | 0.80532328     | 0.965770822    | 0.973880716    | 0.974954639    | 0.994656774    | 0.992445518    |
| 0.874317057    | 0.988741443    | 0.699285864    | 0.976830592    | 0.992982       | 0.992960818    | 0.997264398    | 0.992623106    |
| 0.580230231    | 0.914350431    | 0.447337874    | 0.739337859    | 0.947876489    | 0.7097624      | 0.985747659    | 0.981440065    |
| 0.885571915    | 0.978815887    | 0.84851261     | 0.960852091    | 0.985552764    | 0.961555893    | 0.995647329    | 0.993311719    |
| 0.648953429    | 0.899717428    | 0.899717428    | 0.543377539    | 0.779829192    | 0.933576961    | 0.836938556    | 0.980508944    |
| 0.852432614    | 0.990358757    | 0.569160674    | 0.976079691    | 0.989102483    | 0.991710436    | 0.994895555    | 0.989425178    |
| 0.836840217    | 0.738185224    | 0.798462808    | 0.888838642    | 0.799761146    | 0.800605347    | 0.971534301    | 0.966031449    |
| 0.752669083    | 0.856108988    | 0.703654727    | 0.791313081    | 0.925126246    | 0.884022954    | 0.981445937    | 0.976397057    |
| 0.642240144    | 0.969840183    | 0.634267286    | 0.884471502    | 0.970122292    | 0.931845818    | 0.992627643    | 0.98998576     |
| 0.490826272    | 0.952071525    | 0.600377725    | 0.725707231    | 0.961974738    | 0.675825645    | 0.992648888    | 0.989595247    |
| 0.944068308    | 0.990011325    | 0.902223573    | 0.82132825     | 0.996505891    | 0.794261574    | 0.998022781    | 0.996460526    |
| 0.910226321    | 0.880033571    | 0.941765044    | 0.988612205    | 0.9811713065   | 0.980899106    | 0.995498301    | 0.983785036    |
| 0.481610532    | 0.9542423      | 0.553096099    | 0.848936465    | 0.950659217    | 0.838506443    | 0.990201653    | 0.988200814    |
| 0.93147282     | 0.915967918    | 0.910506613    | 0.922852916    | 0.931259068    | 0.946636897    | 0.989963312    | 0.993090505    |
| 0.902144539    | 0.859438388    | 0.885149797    | 0.848643299    | 0.926020408    | 0.955844438    | 0.978928698    | 0.970935914    |
| 0.869491782    | 0.827796889    | 0.876620562    | 0.937539417    | 0.820577063    | 0.912126896    | 0.95670259     | 0.947986991    |
| 0.866057106    | 0.951329181    | 0.621126572    | 0.891021608    | 0.961411257    | 0.976232868    | 0.988283176    | 0.988055055    |
| 0.927492299    | 0.851529359    | 0.867807378    | 0.68671422     | 0.894932068    | 0.682523638    | 0.973221092    | 0.98125621     |
| 0.922251594    | 0.995865005    | 0.913983018    | 0.995756132    | 0.9938233      | 0.995180948    | 0.999549253    | 0.991694423    |
| 0.987793415    | 0.683463979    | 0.993339201    | 0.997453646    | 0.987955208    | 0.990495004    | 0.98887312     | 0.994894858    |
| 0.993026333    | 0.857142857    | 0.992545565    | 0.991141257    | 0.956452668    | 0.984858441    | 0.985527729    | 0.985699859    |
| 0.967872428    | 0.719410634    | 0.982895161    | 0.996298389    | 0.929478354    | 0.98234161     | 0.983949756    | 0.970141551    |
| 0.549980817    | 0.937845579    | 0.455816585    | 0.90390229     | 0.963503059    | 0.923109105    | 0.990184479    | 0.986951388    |
| 0.868778548    | 0.984076629    | 0.711440973    | 0.980534149    | 0.992853181    | 0.990550092    | 0.996860306    | 0.99400607     |
| 0.883988243    | 0.926924172    | 0.866952566    | 0.948783748    | 0.952024151    | 0.947547447    | 0.988897107    | 0.982789732    |
| 0.777606956    | 0.977527573    | 0.626854439    | 0.732430706    | 0.983641405    | 0.746773899    | 0.993795234    | 0.992391162    |
| 0.713295172    | 0.957027654    | 0.569803583    | 0.800009641    | 0.945009292    | 0.903215427    | 0.990620334    | 0.987923413    |
| 0.6954259      | 0.970759551    | 0.435162572    | 0.868825033    | 0.951870537    | 0.900034344    | 0.992592391    | 0.988859809    |
| 0.968645832    | 0.990368553    | 0.884977023    | 0.812162795    | 0.990258235    | 0.847035268    | 0.996300485    | 0.999165093    |
| 0.771040324    | 0.926452046    | 0.628679527    | 0.885611029    | 0.931988572    | 0.927273768    | 0.988865124    | 0.984139134    |
| 0.825157229    | 0.972201633    | 0.737690574    | 0.726921051    | 0.964108285    | 0.673958449    | 0.992150359    | 0.989678984    |
| 0.899733696    | 0.979486785    | 0.821035677    | 0.960502158    | 0.978072333    | 0.981739995    | 0.993713546    | 0.982097948    |
| 0.947743076    | 0.990498991    | 0.910997232    | 0.97924536     | 0.989080807    | 0.984900282    | 0.995920693    | 0.989466703    |
| 0.860752945    | 0.995427002    | 0.691919143    | 0.979228682    | 0.994796497    | 0.996759141    | 0.998582592    | 0.993055145    |
| 0.764399037    | 0.972269406    | 0.537854313    | 0.880623378    | 0.954610484    | 0.906328416    | 0.992513231    | 0.989305367    |
| 0.872831809    | 0.982456676    | 0.632550176    | 0.923814649    | 0.981618909    | 0.981767384    | 0.997238103    | 0.992635168    |
| 0.750375233    | 0.968687799    | 0.54490385     | 0.864469503    | 0.961984377    | 0.865587189    | 0.995596012    | 0.979166088    |
| 0.875262215    | 0.990718866    | 0.747519786    | 0.986549642    | 0.993572576    | 0.990523589    | 0.997099967    | 0.993166076    |
| 0.87084619     | 0.995280236    | 0.667435236    | 0.983321163    | 0.99429257     | 0.995967815    | 0.9978628      | 0.994061566    |
| 0.892617404    | 0.995234831    | 0.76793966     | 0.979742646    | 0.99365612     | 0.993250042    | 0.998032286    | 0.993050972    |
| 0.856386326    | 0.987644565    | 0.605417181    | 0.9741389      | 0.995203779    | 0.993386768    | 0.999499129    | 0.994193559    |
| 0.925989759    | 0.759423503    | 0.93163377     | 0.932460889    | 0.78729547     | 0.950912438    | 0.956986024    | 0.948866835    |
| 0.880776396    | 0.993805398    | 0.687080096    | 0.980123883    | 0.994947081    | 0.99438118     | 0.997778118    | 0.994025101    |
| 0.8811272      | 0.985086871    | 0.679256844    | 0.984957735    | 0.99617583     | 0.994233885    | 0.997849061    | 0.994532459    |
| 0.925855333    | 0.43653348     | 0.951517983    | 0.958290409    | 0.841070635    | 0.927960293    | 0.949671948    | 0.954775123    |
| NA             | 0.948137506    | 0.676049591    | 0.942923876    | 0.958984436    | 0.941953883    | 0.991269989    | 0.98796643     |
| 0.948137506 NA | 0.968812279 NA | 0.968812279 NA | 0.971472747 NA | 0.971472747 NA | 0.914235002 NA | 0.940761195 NA | 0.97519457 NA  |
| 0.676049591    | 0.968812279 NA | 0.812380372 NA | 0.971472747 NA | 0.953583039 NA | 0.838679372 NA | 0.992820742 NA | 0.990247684 NA |
| 0.942923876    | 0.914235002 NA | 0.953583039 NA | 0.838679372 NA | 0.855307553 NA | 0.404451372 NA | 0.912268646 NA | 0.985341709 NA |
| 0.958984436    | 0.940761195 NA | 0.982207484 NA | 0.982207484 NA | 0.912268646 NA | 0.920203477 NA | 0.982860753 NA | 0.93384818 NA  |
| 0.941953883    | 0.96877521 NA  | 0.990247684 NA | 0.990247684 NA | 0.912268646 NA | 0.982860753 NA | 0.208585008 NA | 0.208585008 NA |
| 0.991269989    | 0.979553037 NA | 0.95145463 NA  | 0.841896711 NA | 0.904784891 NA | 0.986457318 NA | 0.460706633 NA | 0.550211864 NA |
| 0.98796643     | 0.959240133 NA | 0.996832418 NA | 0.995421233 NA | 0.91882331 NA  | 0.993764691 NA | 0.459590494 NA | 0.584843366 NA |
| 0.980032837    | 0.882866159 NA | 0.793611597 NA | 0.791598896 NA | 0.915245671 NA | 0.937957443 NA | 0.90228583 NA  | 0.930332075 NA |
| 0.996307936    | 0.882842627 NA | 0.942610574 NA | 0.86735929 NA  | 0.728316208 NA | 0.930338939 NA | 0.741624117 NA | 0.805384184 NA |
| 0.852204685    | 0.935169928 NA | 0.89103804 NA  | 0.932171095 NA | 0.855494344 NA | 0.930245136 NA | 0.805389749 NA | 0.818338119 NA |
| 0.965910704    | 0.960405707 NA | 0.988239042 NA | 0.987629001 NA | 0.974204947 NA | 0.983625691 NA | 0.740597831 NA | 0.78293831 NA  |
| 0.909226868    | 0.97873968 NA  | 0.745900618 NA | 0.965882283 NA | 0.892450208 NA | 0.979550102 NA | 0.691436772 NA | 0.720236223 NA |
| 0.993464343    | 0.928170595 NA | 0.995974147 NA | 0.993106038 NA | 0.917116168 NA | 0.987607523 NA | 0.651006711 NA | 0.72943765 NA  |
| 0.949462527    | 0.954950538 NA | 0.831117728 NA | 0.950946256 NA | 0.905713284 NA | 0.95847083 NA  | 0.822714681 NA | 0.855248537 NA |
| 0.833464229    | 0.99872263 NA  | 0.816824452 NA | 0.974310731 NA | 0.992340734 NA | 0.992834222 NA | 0.999406739 NA | 0.990191141 NA |
| 0.849572816    | 0.994957872 NA | 0.805811316 NA | 0.964045527 NA | 0.979530514 NA | 0.987825913 NA | 0.990709727 NA | 0.980204735 NA |
| 0.874777894    | 0.985956347 NA | 0.830785509 NA | 0.922563143 NA | 0.960326516 NA | 0.981912368 NA | 0.987603854 NA | 0.976823764 NA |
| 0.890881016    | 0.985311305 NA | 0.849983843 NA | 0.839386151 NA | 0.785260278 NA | 0.958817104 NA | 0.983276526 NA | 0.980164282 NA |
| 0.958416976    | 0.972267458 NA | 0.877150139 NA | 0.542033345 NA | 0.980918413 NA | 0.356406673 NA | 0.985433103 NA | 0.993951613 NA |
| 0.957688887    | 0.989521284 NA | 0.905377969 NA | 0.870091748 NA | 0.93937503 NA  | 0.972127766 NA | 0.98585031 NA  | 0.991908488 NA |
| 0.914701278    | 0.966790782 NA | 0.862043736 NA | 0.857908159 NA | 0.934676859 NA | 0.889881973 NA | 0.982717317 NA | 0.988186584 NA |
| 0.96271992     | 0.980141919 NA | 0.91015068 NA  | 0.79009956 NA  | 0.795338894 NA | 0.921531356 NA | 0.977971014 NA | 0.981012769 NA |
| 0.874278792    | 0.996725677 NA | 0.841582735 NA | 0.972827386 NA | 0.968050117 NA | 0.990369054 NA | 0.91251636 NA  | 0.908496331 NA |
| 0.960229096    | 0.995813734 NA | 0.955911804 NA | 0.66234661 NA  | 0.788209256 NA | 0.958190319 NA | 0.992696867 NA | 0.982056028 NA |
| 0.957652399    | 0.953119678 NA | 0.965573981 NA | 0.964899759 NA | 0.911883718 NA | 0.955193489 NA | 0.742233794 NA | 0.76810415 NA  |
| 0.960212147    | 0.984461428 NA | 0.960353261 NA | 0.987040175 NA | 0.955010924 NA | 0.973484799 NA | 0.845730674 NA | 0.856737993 NA |
| 0.993106184    | 0.96100832 NA  | 0.992636514 NA | 0.983724728 NA | 0.867137067 NA | 0.965713374 NA | 0.721713442 NA | 0.7800263 NA   |
| 0.973926331    | 0.815614773 NA | 0.980009799 NA | 0.919125831 NA | 0.777624655 NA | 0.868623653 NA | 0.703206692 NA | 0.772802985 NA |
| 0.872269756    | 0.977670477 NA | 0.838270899 NA | 0.919165829 NA | 0.837928762 NA | 0.951468866 NA | 0.928728308 NA | 0.92791411 NA  |
| 0.95061784     | 0.978340941 NA | 0.922438385 NA | 0.926725776 NA | 0.840902954 NA | 0.938600496 NA | 0.977420381 NA | 0.966645788 NA |
| 0.937097631    | 0.957675822 NA | 0.830804825 NA | 0.54018191 NA  | 0.931304105 NA | 0.523787348 NA | 0.867649804 NA | 0.881429573 NA |
| 0.900224939    | 0.990382346 NA | 0.861637331 NA | 0.848004047 NA | 0.915638963 NA | 0.989600895 NA | 0.847160531 NA | 0.860087563 NA |
| 0.905963088    | 0.949301431 NA | 0.824534732 NA | 0.673654815 NA | 0.928522077 NA | 0.565826074 NA | 0.888228448 NA | 0.906998659 NA |
| 0.85080765     | 0.983185531 NA | 0.655171192 NA | 0.883666807 NA | 0.888372366 NA | 0.94252538 NA  | 0.983186794 NA | 0.980618883 NA |
| 0.955195011    | 0.949152542 NA | 0.926899962 NA | 0.889954821 NA | 0.726190871 NA | 0.912831152 NA | 0.888090432 NA | 0.896926799 NA |
| 0.972411459    | 0.990476048 NA | 0.908764509 NA | 0.827890801 NA | 0.84129093 NA  | 0.956483016 NA | 0.986447265 NA | 0.983988321 NA |
| 0.956330395    | 0.940180704 NA | 0.937324222 NA | 0.857332215 NA | 0.547845232 NA | 0.87945688 NA  | 0.926891956 NA | 0.939659418 NA |
| 0.921586203    | 0.993387215 NA | 0.920150353 NA | 0.756744289 NA | 0.883507892 NA | 0.972060461 NA | 0.990142011 NA | 0.984763467 NA |
| 0.895606757    | 0.944242695 NA | 0.772050678 NA | 0.552448544 NA | 0.931088222 NA | 0.352414753 NA | 0.958172927 NA | 0.963171931 NA |
| 0.8328684      | 0.993062126 NA | 0.772870751 NA | 0.842020561 NA | 0.954182662 NA | 0.993923319 NA | 0.989998889 NA | 0.985412295 NA |
| 0.975956506    | 0.9            |                |                |                |                |                |                |

bray

| UZ.P131     | UZ.P132     | UZ.P133     | UZ.P115     | UZ.P134     | UZ.P135     | UZ.P136     | UZ.P137     |
|-------------|-------------|-------------|-------------|-------------|-------------|-------------|-------------|
| 0.962371548 | 0.998281376 | 0.839354473 | 0.949250827 | 0.916503125 | 0.991690505 | 0.797855468 | 0.996264917 |
| 0.993340359 | 0.998210867 | 0.905265471 | 0.989320885 | 0.896481874 | 0.998166713 | 0.67010731  | 0.995031159 |
| 0.85927683  | 0.997197242 | 0.918516742 | 0.923174738 | 0.973907342 | 0.992961671 | 0.979809818 | 0.993381879 |
| 0.969259562 | 0.998461034 | 0.881690183 | 0.956206519 | 0.940519797 | 0.995709419 | 0.945128583 | 0.995752207 |
| 0.99663806  | 0.998166494 | 0.979532723 | 0.991588101 | 0.935708335 | 0.997060879 | 0.703857029 | 0.9968088   |
| 0.965090815 | 0.994762627 | 0.715753092 | 0.936484734 | 0.869714572 | 0.986629649 | 0.79539405  | 0.988526648 |
| 0.991366877 | 0.998382385 | 0.915591313 | 0.985073147 | 0.950607602 | 0.995563064 | 0.964212645 | 0.996571717 |
| 0.897073703 | 0.995034437 | 0.644140421 | 0.886972107 | 0.874209335 | 0.988821538 | 0.650824582 | 0.9893038   |
| 0.993577239 | 0.997795795 | 0.955958664 | 0.989211003 | 0.888314011 | 0.998757877 | 0.591963609 | 0.994392847 |
| 0.966584967 | 0.984276613 | 0.754067971 | 0.868947087 | 0.84533818  | 0.97669466  | 0.906261654 | 0.970611645 |
| 0.73417487  | 0.990946825 | 0.582931855 | 0.841620339 | 0.811160286 | 0.981699175 | 0.884359304 | 0.983198947 |
| 0.868568575 | 0.996840228 | 0.831791692 | 0.944199079 | 0.932746657 | 0.984525183 | 0.906556695 | 0.994144982 |
| 0.976775032 | 0.996414679 | 0.84126885  | 0.964980788 | 0.912527933 | 0.993582366 | 0.907808842 | 0.993758567 |
| 0.998034941 | 0.999228256 | 0.981706345 | 0.993708268 | 0.966845696 | 0.996010886 | 0.972087961 | 0.997362394 |
| 0.995687206 | 0.996325173 | 0.904773535 | 0.970988104 | 0.957107469 | 0.986557285 | 0.978800334 | 0.988879804 |
| 0.974666886 | 0.996014778 | 0.840282094 | 0.957301009 | 0.899797062 | 0.980751316 | 0.855409071 | 0.993383163 |
| 0.935265872 | 0.995857646 | 0.908215165 | 0.902305424 | 0.947640068 | 0.989930423 | 0.973817286 | 0.989971816 |
| 0.601386427 | 0.988082598 | 0.778408671 | 0.811323677 | 0.915006676 | 0.983311978 | 0.946106149 | 0.979697164 |
| 0.894338056 | 0.974145548 | 0.894097667 | 0.809911845 | 0.800488879 | 0.987548282 | 0.711397513 | 0.942959586 |
| 0.835040138 | 0.995172295 | 0.886581219 | 0.877655641 | 0.927315029 | 0.992508486 | 0.5735914   | 0.989271003 |
| 0.70581713  | 0.987565183 | 0.727536092 | 0.659236545 | 0.894659992 | 0.969939933 | 0.939588607 | 0.962481265 |
| 0.997163024 | 0.999642495 | 0.994892614 | 0.993878954 | 0.931713988 | 0.999527606 | 0.930622627 | 0.997219949 |
| 0.994021049 | 0.986731654 | 0.974293237 | 0.968631105 | 0.992877734 | 0.986763365 | 0.996284794 | 0.935753846 |
| 0.988731474 | 0.979356568 | 0.977883751 | 0.94472323  | 0.979693141 | 0.992255107 | 0.988183161 | 0.956580071 |
| 0.992406759 | 0.964812367 | 0.970617355 | 0.92835704  | 0.962779878 | 0.98800578  | 0.977506775 | 0.938327658 |
| 0.960545045 | 0.995942868 | 0.768256276 | 0.944995981 | 0.876053847 | 0.992449469 | 0.680597221 | 0.992215681 |
| 0.996628468 | 0.998120502 | 0.99879965  | 0.991394309 | 0.952922869 | 0.996337874 | 0.83129702  | 0.997188689 |
| 0.973495351 | 0.995065085 | 0.898119122 | 0.952733167 | 0.874913216 | 0.990881872 | 0.953995464 | 0.99092907  |
| 0.892850342 | 0.998595352 | 0.817619938 | 0.957920495 | 0.922715434 | 0.996170699 | 0.818550859 | 0.997081964 |
| 0.962415763 | 0.996259207 | 0.719808777 | 0.94549498  | 0.864988624 | 0.993087502 | 0.884028578 | 0.993017822 |
| 0.970178415 | 0.997542771 | 0.814128226 | 0.951581972 | 0.896772976 | 0.992845675 | 0.743744793 | 0.996151748 |
| 0.937049512 | 0.999374722 | 0.924679106 | 0.95667554  | 0.979622725 | 0.995604247 | 0.988534778 | 0.998500963 |
| 0.958067161 | 0.994851651 | 0.859899661 | 0.935564953 | 0.836537982 | 0.991269329 | 0.811419877 | 0.990584737 |
| 0.983932148 | 0.997867242 | 0.904282614 | 0.973570082 | 0.911127666 | 0.992647917 | 0.895457626 | 0.993944344 |
| 0.992589314 | 0.995082822 | 0.968366764 | 0.978789259 | 0.894783574 | 0.99757071  | 0.907716133 | 0.992456377 |
| 0.996247156 | 0.996933345 | 0.979312117 | 0.986868678 | 0.935304538 | 0.995478453 | 0.941292039 | 0.985663432 |
| 0.997527681 | 0.999158111 | 0.984939977 | 0.995543763 | 0.940500458 | 0.998657924 | 0.731477449 | 0.996242915 |
| 0.976578876 | 0.9969989   | 0.805504699 | 0.96296746  | 0.859397629 | 0.995308609 | 0.75166448  | 0.995681202 |
| 0.99722055  | 0.997900288 | 0.914173544 | 0.987338667 | 0.911321251 | 0.995054035 | 0.749590257 | 0.997993705 |
| 0.99588498  | 0.998194059 | 0.827496011 | 0.985643744 | 0.899754707 | 0.994973511 | 0.808061602 | 0.997101538 |
| 0.997147906 | 0.998086682 | 0.986701261 | 0.989341881 | 0.936568204 | 0.994854996 | 0.718618484 | 0.99641357  |
| 0.998021479 | 0.999186212 | 0.995085038 | 0.995584156 | 0.939296237 | 0.998636437 | 0.708600747 | 0.99684896  |
| 0.995720639 | 0.999089369 | 0.973294307 | 0.994381297 | 0.925083031 | 0.99949759  | 0.781752015 | 0.996615274 |
| 0.996918854 | 0.999306381 | 0.968362941 | 0.995639805 | 0.930806258 | 0.999531561 | 0.744519701 | 0.997756009 |
| 0.866240707 | 0.968529769 | 0.816911803 | 0.721222612 | 0.878486593 | 0.993237532 | 0.916879178 | 0.94115937  |
| 0.997499103 | 0.999107241 | 0.953417158 | 0.993707582 | 0.941444924 | 0.998014143 | 0.758425784 | 0.996940625 |
| 0.997148777 | 0.998656567 | 0.982464713 | 0.992367871 | 0.955573422 | 0.995663905 | 0.780868145 | 0.996270771 |
| 0.948553459 | 0.971422767 | 0.887653469 | 0.845409674 | 0.878539859 | 0.967743914 | 0.947363389 | 0.935121888 |
| 0.980032837 | 0.996307936 | 0.852204685 | 0.965910704 | 0.909226868 | 0.993451797 | 0.850102658 | 0.993464343 |
| 0.979530307 | 0.959240133 | 0.882866159 | 0.882842627 | 0.935169928 | 0.960405702 | 0.97873968  | 0.928170595 |
| 0.95145463  | 0.996832418 | 0.793615974 | 0.94261055  | 0.90103804  | 0.988239042 | 0.745900618 | 0.995974147 |
| 0.841896711 | 0.995421233 | 0.791598896 | 0.86735929  | 0.932171095 | 0.987629001 | 0.965882283 | 0.993106038 |
| 0.904784891 | 0.91882331  | 0.915245671 | 0.728316208 | 0.855494344 | 0.974204947 | 0.892450208 | 0.917161168 |
| 0.986457318 | 0.993764691 | 0.937957443 | 0.930338939 | 0.930245136 | 0.983625691 | 0.979550102 | 0.987607523 |
| 0.460706633 | 0.459590494 | 0.90228583  | 0.741624117 | 0.805389749 | 0.740597831 | 0.691436772 | 0.651006711 |
| 0.550211864 | 0.584844366 | 0.930332075 | 0.805384184 | 0.818338119 | 0.78293831  | 0.720236223 | 0.72943765  |
| NA          | 0.580672128 | 0.756183952 | 0.611785977 | 0.80756809  | 0.781873011 | 0.700063189 | 0.723208458 |
| 0.580672128 | NA          | 0.895254731 | 0.461174789 | 0.777478712 | 0.661447313 | 0.685670648 | 0.392550143 |
| 0.756183952 | 0.895254731 | NA          | 0.701227317 | 0.808776826 | 0.914861007 | 0.906670791 | 0.889424036 |
| 0.611785977 | 0.646174789 | 0.701227317 | NA          | 0.786717284 | 0.786717284 | 0.812051254 | 0.777293538 |
| 0.80756809  | 0.777478712 | 0.808776826 | 0.786717284 | NA          | 0.833602998 | 0.818641193 | 0.755795981 |
| 0.781873011 | 0.661447313 | 0.914861007 | 0.812051254 | 0.833602998 | NA          | 0.818641193 | 0.739525717 |
| 0.700063189 | 0.685670648 | 0.906670791 | 0.777293538 | 0.755795981 | 0.818641193 | 0.789960175 | 0.789960175 |
| 0.723208458 | 0.392550143 | 0.889424036 | 0.652638191 | 0.794794145 | 0.739525717 | 0.789960175 | NA          |
| 0.79141698  | 0.787144764 | 0.856958696 | 0.74991705  | 0.762152805 | 0.858619931 | 0.844028353 | 0.784989316 |
| 0.995871942 | 0.999378806 | 0.985386637 | 0.99544906  | 0.887855596 | 1           | 0.81200182  | 0.997111913 |
| 0.990876211 | 0.99226525  | 0.974557865 | 0.981832392 | 0.873178617 | 0.994212082 | 0.772763377 | 0.990897414 |
| 0.988606208 | 0.992352228 | 0.877775853 | 0.969862626 | 0.844683342 | 0.988115327 | 0.823244815 | 0.988824104 |
| 0.959305615 | 0.996467273 | 0.954294211 | 0.912113087 | 0.863826274 | 0.952366001 | 0.839247967 | 0.993811744 |
| 0.984164179 | 0.992786773 | 0.961789844 | 0.972246987 | 0.96184475  | 0.986372961 | 0.985556873 | 0.991973822 |
| 0.740373131 | 0.996004545 | 0.835717591 | 0.897550944 | 0.939900266 | 0.991402724 | 0.972955822 | 0.993863664 |
| 0.97731889  | 0.995641667 | 0.82564874  | 0.949818371 | 0.844933372 | 0.986492833 | 0.969833965 | 0.994165307 |
| 0.840187228 | 0.993265655 | 0.803244443 | 0.775088874 | 0.933561482 | 0.950765921 | 0.942180279 | 0.988750463 |
| 0.918454803 | 0.894437593 | 0.939783891 | 0.896572414 | 0.792496868 | 0.92458058  | 0.763570341 | 0.894149615 |
| 0.995967996 | 0.998191954 | 0.998057023 | 0.946758546 | 0.9178027   | 0.985724505 | 0.919783478 | 0.996313403 |
| 0.776734948 | 0.689304548 | 0.910861813 | 0.777677316 | 0.795118664 | 0.790262603 | 0.79302818  | 0.745935771 |
| 0.857347163 | 0.825727821 | 0.940851112 | 0.873084701 | 0.392427962 | 0.874302881 | 0.851715254 | 0.830451    |
| 0.782473999 | 0.440730086 | 0.876928927 | 0.583022987 | 0.825826614 | 0.799341163 | 0.826316356 | 0.462661738 |
| 0.780682887 | 0.486756268 | 0.834566241 | 0.516908213 | 0.773520961 | 0.766241413 | 0.810454888 | 0.508988263 |
| 0.906210641 | 0.934552136 | 0.89876553  | 0.864347942 | 0.766637143 | 0.937209431 | 0.850881068 | 0.930316873 |
| 0.971313894 | 0.991595893 | 0.982739592 | 0.905004327 | 0.916943145 | 1           | 0.937824515 | 0.984478165 |
| 0.546590142 | 0.861918416 | 0.803688454 | 0.748404648 | 0.847680101 | 0.887791717 | 0.873622445 | 0.860933679 |
| 0.595180996 | 0.818338715 | 0.757569423 | 0.672694787 | 0.716520651 | 0.880530397 | 0.803305234 | 0.8170908   |
| 0.860233066 | 0.875630163 | 0.855403015 | 0.803273398 | 0.825508857 | 0.901460509 | 0.890630292 | 0.872210428 |
| 0.948379542 | 0.994949962 | 0.861318091 | 0.873883849 | 0.90248101  | 0.99898547  | 0.434734886 | 0.990866051 |
| 0.878659966 | 0.874916438 | 0.755846624 | 0.743113606 | 0.846363934 | 0.926473544 | 0.864278703 | 0.871968191 |
| 0.933248112 | 0.99609531  | 0.848168407 | 0.882512414 | 0.960994918 | 0.994380222 | 0.957016777 | 0.9930902   |
| 0.937002531 | 0.918631965 | 0.955008886 | 0.815004294 | 0.916237166 | 0.969744206 | 0.930966021 | 0.920726447 |
| 0.982192056 | 0.996937244 | 0.974826564 | 0.954723663 | 0.917952975 | 0.988553563 | 0.920524263 | 0.994349072 |
| 0.954319255 | 0.965790726 | 0.897713476 | 0.922205037 | 0.830755674 | 0.966195463 | 0.854745504 | 0.962401141 |
| 0.750934854 | 0.997763627 | 0.859755933 | 0.868376332 | 0.855745419 | 0.999745082 | 0.727674713 | 0.993944265 |
| 0.634133746 | 0.691778367 | 0.70685032  | 0.381300144 | 0.840560708 | 0.872381911 | 0.81369155  |             |



bray

| UZ.P145     | UZ.P146     | UZ.P147     | UZ.P148     | UZ.P149     | UZ.P150     | UZ.P151     | UZ.P152     |
|-------------|-------------|-------------|-------------|-------------|-------------|-------------|-------------|
| 0.914391775 | 0.887845234 | 0.958565485 | 0.95300409  | 0.95787772  | 0.995084563 | 0.982678303 | 0.84340572  |
| 0.988589757 | 0.67398983  | 0.962871578 | 0.962201018 | 0.97238252  | 0.992706728 | 0.994893774 | 0.829614554 |
| 0.933721923 | 0.995992096 | 0.996264274 | 0.979752635 | 0.990795228 | 0.99560213  | 0.983457557 | 0.974186894 |
| 0.956968044 | 0.938450296 | 0.975651145 | 0.973998584 | 0.977399177 | 0.995158278 | 0.989674596 | 0.929525223 |
| 0.998581858 | 0.772832747 | 0.968113144 | 0.973148024 | 0.977331734 | 0.995108289 | 0.994552627 | 0.801044041 |
| 0.896165232 | 0.831127188 | 0.941997509 | 0.923412909 | 0.948038168 | 0.985707533 | 0.958513661 | 0.82767526  |
| 0.970678733 | 0.953885316 | 0.979461451 | 0.976823212 | 0.976361601 | 0.99618471  | 0.987247202 | 0.9393477   |
| 0.850570456 | 0.846510139 | 0.936368904 | 0.94931007  | 0.949874895 | 0.988738794 | 0.953149663 | 0.843836272 |
| 0.994720285 | 0.681747097 | 0.956591871 | 0.960793676 | 0.965403971 | 0.991378922 | 0.996458784 | 0.823373074 |
| 0.882414912 | 0.932251024 | 0.879201392 | 0.90115778  | 0.929202764 | 0.962863811 | 0.825854365 | 0.88217202  |
| 0.826272128 | 0.811549567 | 0.926386628 | 0.922719204 | 0.940588019 | 0.977399914 | 0.940644587 | 0.759730659 |
| 0.92743642  | 0.916198722 | 0.962630743 | 0.967676503 | 0.973726316 | 0.993888911 | 0.977275679 | 0.911729081 |
| 0.945076409 | 0.909434366 | 0.969698898 | 0.95221367  | 0.962599774 | 0.992245615 | 0.97916117  | 0.897761591 |
| 0.991594408 | 0.941602213 | 0.963854383 | 0.985976787 | 0.986356896 | 0.996236801 | 0.988514838 | 0.947918997 |
| 0.992053587 | 0.949359391 | 0.980999596 | 0.974224915 | 0.981162246 | 0.992884415 | 0.975706083 | 0.96563493  |
| 0.947399446 | 0.924710776 | 0.948032163 | 0.969951746 | 0.949071493 | 0.996267091 | 0.974189335 | 0.905506808 |
| 0.924439723 | 0.996265158 | 0.990906954 | 0.804197564 | 0.987999303 | 0.994897314 | 0.964776086 | 0.924785128 |
| 0.868190216 | 0.979659262 | 0.980134942 | 0.943522381 | 0.967413787 | 0.985055351 | 0.94321986  | 0.930767126 |
| 0.867310909 | 0.780847145 | 0.884375227 | 0.866980166 | 0.913488548 | 0.941220477 | 0.934444653 | 0.782549399 |
| 0.905939935 | 0.899250267 | 0.956923951 | 0.968795514 | 0.971726764 | 0.984583227 | 0.985601152 | 0.921492966 |
| 0.807331228 | 0.987616325 | 0.990921148 | 0.954245682 | 0.97747317  | 0.951145572 | 0.84723415  | 0.936419663 |
| 0.999341806 | 0.846297866 | 0.963510444 | 0.97419545  | 0.972292669 | 0.994096438 | 0.999363494 | 0.884274979 |
| 0.99743515  | 0.996552783 | 0.998730872 | 0.980164372 | 0.996857065 | 0.977366703 | 0.968218875 | 0.995995014 |
| 0.990518846 | 0.991891956 | 0.989572929 | 0.975026806 | 0.989677595 | 0.934461341 | 0.956777459 | 0.982657662 |
| 0.996572082 | 0.967767857 | 0.987655458 | 0.951348932 | 0.982612447 | 0.933541607 | 0.958281702 | 0.948935608 |
| 0.895091832 | 0.876077888 | 0.950852322 | 0.914771805 | 0.935433518 | 0.990602011 | 0.970672776 | 0.868097543 |
| 0.996418378 | 0.796952878 | 0.979997224 | 0.970616793 | 0.981012022 | 0.996841467 | 0.993899619 | 0.866222698 |
| 0.941349891 | 0.836083307 | 0.955626485 | 0.904942995 | 0.94831851  | 0.987782844 | 0.976932186 | 0.837973562 |
| 0.935262961 | 0.909746341 | 0.970283834 | 0.966982798 | 0.965050001 | 0.995907262 | 0.98205574  | 0.875441388 |
| 0.853785961 | 0.879775157 | 0.93818303  | 0.941409041 | 0.944649346 | 0.991162266 | 0.972243481 | 0.80411176  |
| 0.930450846 | 0.839871744 | 0.960135876 | 0.951308151 | 0.97128945  | 0.993492599 | 0.976884486 | 0.802660537 |
| 0.944268225 | 0.999910588 | 1           | 0.904628224 | 0.996270612 | 0.997870109 | 0.984557213 | 0.984800386 |
| 0.908156301 | 0.705968649 | 0.943025998 | 0.924214777 | 0.943719714 | 0.988545644 | 0.965358544 | 0.670554277 |
| 0.945697007 | 0.834670635 | 0.964025889 | 0.946252902 | 0.969361899 | 0.992554205 | 0.976917934 | 0.844306016 |
| 0.974927135 | 0.672676404 | 0.944543624 | 0.94212905  | 0.951991496 | 0.985517179 | 0.990346983 | 0.692365854 |
| 0.98637096  | 0.878590481 | 0.964224648 | 0.837470999 | 0.97496472  | 0.989951795 | 0.9916547   | 0.916167508 |
| 0.998681292 | 0.718073217 | 0.970952345 | 0.98549657  | 0.968774031 | 0.99557783  | 0.998735927 | 0.839538824 |
| 0.898155688 | 0.904388938 | 0.952715423 | 0.939467411 | 0.910140844 | 0.992990492 | 0.977476502 | 0.849032246 |
| 0.974940439 | 0.855648119 | 0.962794245 | 0.971109259 | 0.977523868 | 0.993482503 | 0.990856825 | 0.875150755 |
| 0.895793801 | 0.827803988 | 0.948243993 | 0.918815503 | 0.960083886 | 0.99423768  | 0.976931637 | 0.780003817 |
| 0.998259102 | 0.787076147 | 0.969837887 | 0.965468338 | 0.977784416 | 0.994556804 | 0.99318543  | 0.87789349  |
| 0.999635374 | 0.812555404 | 0.968822825 | 0.974390083 | 0.9693942   | 0.994778881 | 0.998632518 | 0.837806464 |
| 0.996199034 | 0.815347722 | 0.973750096 | 0.988138034 | 0.981750588 | 0.993490543 | 0.998525449 | 0.895306443 |
| 0.996560437 | 0.693217742 | 0.972326322 | 0.968106799 | 0.970857703 | 0.992450262 | 0.999417318 | 0.81644625  |
| 0.835054398 | 0.941470434 | 0.938098188 | 0.853446229 | 0.944207467 | 0.936937596 | 0.9270431   | 0.849137267 |
| 0.998044358 | 0.840282263 | 0.976543773 | 0.982923434 | 0.977265442 | 0.996700214 | 0.996936466 | 0.907087997 |
| 0.997993891 | 0.841170031 | 0.976289704 | 0.977100729 | 0.973556595 | 0.996254171 | 0.994608132 | 0.892115971 |
| 0.930680483 | 0.963968311 | 0.966662531 | 0.888287592 | 0.940572052 | 0.931863727 | 0.836366124 | 0.908416193 |
| 0.96271992  | 0.874278792 | 0.960229096 | 0.957652399 | 0.960212147 | 0.993106184 | 0.973926331 | 0.872269756 |
| 0.980141919 | 0.996725677 | 0.995813734 | 0.953119678 | 0.984461428 | 0.96100832  | 0.815614773 | 0.977670477 |
| 0.91015068  | 0.841582735 | 0.955911804 | 0.965573981 | 0.960353261 | 0.992636514 | 0.980099799 | 0.838270899 |
| 0.79009956  | 0.972827386 | 0.66234661  | 0.964899759 | 0.987040175 | 0.983724728 | 0.919125831 | 0.919165829 |
| 0.795338894 | 0.968050117 | 0.788209256 | 0.911883718 | 0.955010924 | 0.867137067 | 0.777624655 | 0.837928762 |
| 0.921531356 | 0.990369054 | 0.958190319 | 0.955193483 | 0.973484799 | 0.965713374 | 0.868623653 | 0.951468666 |
| 0.977971014 | 0.91251636  | 0.992696867 | 0.742233794 | 0.845730674 | 0.721713442 | 0.703206692 | 0.928728308 |
| 0.981012769 | 0.908496331 | 0.982056028 | 0.76810415  | 0.856737993 | 0.7800263   | 0.772802985 | 0.92791411  |
| 0.840187228 | 0.918454803 | 0.995967996 | 0.776734948 | 0.857347163 | 0.782473999 | 0.780682887 | 0.906210641 |
| 0.993265655 | 0.894437593 | 0.998191954 | 0.689304548 | 0.825727821 | 0.440730086 | 0.486756268 | 0.934552136 |
| 0.803244443 | 0.939783891 | 0.989057023 | 0.910861813 | 0.940851112 | 0.876928927 | 0.834566241 | 0.89876553  |
| 0.775088874 | 0.896572414 | 0.946758546 | 0.776773716 | 0.873084701 | 0.583022987 | 0.516908213 | 0.864347942 |
| 0.933561482 | 0.974296868 | 0.9178027   | 0.795118664 | 0.392427962 | 0.825826614 | 0.773520961 | 0.766637143 |
| 0.950765921 | 0.924580058 | 0.985724505 | 0.790262803 | 0.874302881 | 0.799341163 | 0.766241413 | 0.937209431 |
| 0.942180279 | 0.763570341 | 0.919783478 | 0.79302818  | 0.851175254 | 0.826316356 | 0.850881068 | 0.850881068 |
| 0.988750463 | 0.894149615 | 0.996313403 | 0.745935771 | 0.830451    | 0.462661738 | 0.508988263 | 0.930316873 |
| 0.934554028 | 0.860411899 | 0.998321193 | 0.840074288 | 0.824399437 | 0.813742259 | 0.821240972 | 0.818795205 |
| 0.998653132 | 0.491698619 | 0.950500753 | 0.929886285 | 0.952791369 | 0.989475161 | 0.999133988 | 0.768796927 |
| 0.990229035 | 0.552478748 | 0.94077596  | 0.949934942 | 0.958580361 | 0.980950461 | 0.988483376 | 0.713785103 |
| 0.953086125 | 0.724291595 | 0.934936781 | 0.946654653 | 0.958303407 | 0.982511311 | 0.978697205 | 0.792537733 |
| 0.604750807 | 0.82116651  | 0.789820816 | 0.903237627 | 0.962004543 | 0.98561466  | 0.950831648 | 0.648282338 |
| 0.989095666 | 0.996404621 | 0.999242083 | 0.987274854 | 0.992184626 | 0.994906788 | 0.949014085 | 0.987538115 |
| 0.77816194  | 0.988857793 | 0.963950808 | 0.924307183 | 0.97794414  | 0.991461837 | 0.98481399  | 0.850827003 |
| 0.833622641 | 0.799857349 | 0.957670147 | 0.941980696 | 0.977615185 | 0.983923484 | 0.939360004 | 0.767562312 |
| NA          | 0.997752899 | 0.838600221 | 0.873724427 | 0.873724427 | 0.972382111 | 0.919792166 | 0.707335063 |
| 0.997752899 | NA          | 0.940387591 | 0.940387591 | 0.850974167 | 0.874311845 | 0.893394842 | 0.69185162  |
| 0.838600221 | 0.940387591 | NA          | 0.95446915  | 0.941384172 | 0.983740954 | 0.937810408 | 0.876266873 |
| 0.873724427 | 0.850974167 | 0.95446915  | NA          | 0.818081728 | 0.776734746 | 0.766898812 | 0.822658021 |
| 0.985848686 | 0.892153957 | 0.941384172 | 0.818081728 | NA          | 0.866317619 | 0.866057468 | 0.883360639 |
| 0.972382111 | 0.874311845 | 0.983740954 | 0.776734746 | 0.866317619 | NA          | 0.390253725 | 0.914513693 |
| 0.919792166 | 0.893394842 | 0.937810408 | 0.766898812 | 0.866057468 | 0.914513693 | 0.916500848 | NA          |
| 0.707335063 | 0.69185162  | 0.876266873 | 0.822658021 | 0.883360639 | 0.967679505 | 0.929556533 | 0.659915589 |
| 0.600079055 | 0.964252472 | 0.866666667 | 0.8217725   | 0.933186376 | 0.883544007 | 0.817497125 | 0.915655594 |
| 0.877968687 | 0.933948912 | 0.979644463 | 0.865653061 | 0.902580125 | 0.81589352  | 0.820992313 | 0.738322341 |
| 0.870385692 | 0.648446206 | 0.93805297  | 0.834283224 | 0.843138338 | 0.85432375  | 0.798982458 | 0.749244713 |
| 0.954544753 | 0.727921597 | 0.996138456 | 0.867740739 | 0.907914365 | 0.978699786 | 0.951790867 | 0.781977972 |
| 0.685003374 | 0.873615101 | 0.869267382 | 0.90379741  | 0.957998266 | 0.825596002 | 0.771744408 | 0.778530644 |
| 0.700687094 | 0.937311166 | 0.863859667 | 0.815532174 | 0.907703947 | 0.98332981  | 0.954754022 | 0.874595279 |
| 0.744259493 | 0.991556393 | 0.846126857 | 0.922094    | 0.985938847 | 0.886888348 | 0.7912665   | 0.813205175 |
| 0.733540759 | 0.915488952 | 0.786999071 | 0.844209935 | 0.935510656 | 0.988741575 | 0.966813863 | 0.771323217 |
| 0.732913655 | 0.850164443 | 0.685219849 | 0.925068843 | 0.970916156 | 0.9558727   | 0.889906309 | 0.820229532 |
| 0.979150579 | 0.836275466 | 0.932085195 | 0.948850313 | 0.938048098 | 0.986952955 | 0.994868384 | 0.794543932 |
| 0.896847706 | 0.639830847 | 0.937719308 | 0.954241056 | 0.944492978 | 0.986952955 | 0.915997681 | 0.868622081 |
| 0.772819572 | 0.897297518 | 0.969666372 | 0.816564036 | 0.896182117 | 0.564336918 | 0.66470723  | 0           |





bray

| UZ.P122        | UZ.P123     |
|----------------|-------------|
| 0,988423126    | 0,892726052 |
| 0,99012326     | 0,912120742 |
| 0,989461162    | 0,964902611 |
| 0,990397898    | 0,94517386  |
| 0,993630935    | 0,925782078 |
| 0,967674029    | 0,867771677 |
| 0,991113784    | 0,957247984 |
| 0,969478612    | 0,845709629 |
| 0,98882693     | 0,891742726 |
| 0,940575131    | 0,841714514 |
| 0,962039299    | 0,792565026 |
| 0,988489413    | 0,927725463 |
| 0,986362863    | 0,907050388 |
| 0,99459404     | 0,966603904 |
| 0,978985562    | 0,956307296 |
| 0,981642874    | 0,884206562 |
| 0,983755155    | 0,951756716 |
| 0,963650381    | 0,911349986 |
| 0,903006718    | 0,677575758 |
| 0,979220989    | 0,911441488 |
| 0,937300413    | 0,90113598  |
| 0,993592153    | 0,927990509 |
| 0,938262195    | 0,994175432 |
| 0,956646961    | 0,985615251 |
| 0,927539025    | 0,957961733 |
| 0,98178401     | 0,878455871 |
| 0,993787055    | 0,949068466 |
| 0,975904253    | 0,872652783 |
| 0,991253567    | 0,923862882 |
| 0,981829767    | 0,838606404 |
| 0,983886097    | 0,884562878 |
| 0,995546413    | 0,982587503 |
| 0,977051431    | 0,848055736 |
| 0,986519656    | 0,907886049 |
| 0,981085047    | 0,876942688 |
| 0,989279956    | 0,942667405 |
| 0,993573045    | 0,924418015 |
| 0,986705836    | 0,879060626 |
| 0,992185267    | 0,940129138 |
| 0,988785379    | 0,859541745 |
| 0,993652741    | 0,933772018 |
| 0,996498375    | 0,934485279 |
| 0,994377132    | 0,955312275 |
| 0,994605457    | 0,930962438 |
| 0,90168514     | 0,774127182 |
| 0,994726005    | 0,943567635 |
| 0,994395818    | 0,95001507  |
| 0,897761085    | 0,879553757 |
| 0,982007074    | 0,89465186  |
| 0,912172759    | 0,958736397 |
| 0,984969448    | 0,896266393 |
| 0,974306437    | 0,918469571 |
| 0,914953998    | 0,782875871 |
| 0,97378058     | 0,967448916 |
| 0,292387723    | 0,943234937 |
| 0,437007326    | 0,943171643 |
| 0,434944864    | 0,903876991 |
| 0,326688817    | 0,94566896  |
| 0,888733659    | 0,914468681 |
| 0,690380596    | 0,821568339 |
| 0,774301532    | 0,749964594 |
| 0,673113324    | 0,96119899  |
| 0,66229501     | 0,829622563 |
| 0,551822176    | 0,948616195 |
| 0,788476493    | 0,855813153 |
| 0,993432349    | 0,864080918 |
| 0,980603638    | 0,862637927 |
| 0,96945703     | 0,851047227 |
| 0,966522636    | 0,752785988 |
| 0,986701632    | 0,983883317 |
| 0,970334984    | 0,828128428 |
| 0,971857581    | 0,876982352 |
| 0,941840545    | 0,715605601 |
| 0,896365707    | 0,805827385 |
| 0,966279003    | 0,827896712 |
| 0,681204284    | 0,81975452  |
| 0,83582644     | 0,884670994 |
| 0,6170724      | 0,946383409 |
| 0,596359105    | 0,917439932 |
| 0,898103359    | 0,592718966 |
| 0,960482708    | 0,731244814 |
| 0,854254127    | 0,913713671 |
| 0,825771761    | 0,724158001 |
| 0,875656221    | 0,855196516 |
| 0,974506253    | 0,755889289 |
| 0,846846295    | 0,745451981 |
| 0,973886637    | 0,856871108 |
| 0,896150999    | 0,820408606 |
| 0,97460983     | 0,785880019 |
| 0,958172635    | 0,848482581 |
| 0,984785805    | 0,801240056 |
| 0,752501905    | 0,839166751 |
| 0,365668152    | 0,85817428  |
| 0,665505464    | 0,720727161 |
| 0,957662891    | 0,824904745 |
| 0,930408848    | 0,816397229 |
| NA             | 0,902471805 |
| 0,902471805 NA |             |

## Supplementary File 4

jaccard

|         | UZ.P066     | UZ.P067     | UZ.P068     | UZ.P069     | UZ.P070     | UZ.P071     | UZ.P072     | UZ.P073     |
|---------|-------------|-------------|-------------|-------------|-------------|-------------|-------------|-------------|
| UZ.P066 | NA          |             |             |             |             |             |             |             |
| UZ.P067 | 0.81884058  | NA          |             |             |             |             |             |             |
| UZ.P068 | 0.795454545 | 0.90625     | NA          |             |             |             |             |             |
| UZ.P069 | 0.616071429 | 0.737704918 | 0.756410256 | NA          |             |             |             |             |
| UZ.P070 | 0.816793893 | 0.533333333 | 0.872093023 | 0.74137931  | NA          |             |             |             |
| UZ.P071 | 0.626086957 | 0.792307692 | 0.795180723 | 0.657657658 | 0.758333333 | NA          |             |             |
| UZ.P072 | 0.692307692 | 0.784       | 0.782051282 | 0.702702703 | 0.809917355 | 0.663636364 | NA          |             |
| UZ.P073 | 0.654205607 | 0.837398374 | 0.788732394 | 0.689320388 | 0.805309735 | 0.591836735 | 0.642857143 | NA          |
| UZ.P074 | 0.831858407 | 0.621052632 | 0.825396825 | 0.794117647 | 0.602272727 | 0.8         | 0.825242718 | 0.857142857 |
| UZ.P056 | 0.712962963 | 0.810344828 | 0.791044776 | 0.712871287 | 0.818181818 | 0.656565657 | 0.693877551 | 0.677777778 |
| UZ.P075 | 0.723577236 | 0.7         | 0.821428571 | 0.642201835 | 0.701754386 | 0.709401709 | 0.730434783 | 0.719626168 |
| UZ.P076 | 0.628865979 | 0.810810811 | 0.75        | 0.694736842 | 0.830188679 | 0.677083333 | 0.688172043 | 0.62195122  |
| UZ.P077 | 0.625       | 0.816666667 | 0.75        | 0.673287327 | 0.824561404 | 0.63        | 0.639175258 | 0.677419355 |
| UZ.P079 | 0.834782609 | 0.757009346 | 0.882352941 | 0.820754717 | 0.75        | 0.814814815 | 0.861111111 | 0.824742268 |
| UZ.P080 | 0.744444444 | 0.857142857 | 0.720930233 | 0.731707317 | 0.804597701 | 0.770114943 | 0.8         | 0.708333333 |
| UZ.P081 | 0.631067961 | 0.861788618 | 0.779411765 | 0.742857143 | 0.842105263 | 0.65        | 0.631578947 | 0.593023256 |
| UZ.P083 | 0.68        | 0.860869565 | 0.724137931 | 0.71875     | 0.828571429 | 0.701030928 | 0.726315789 | 0.727272727 |
| UZ.P084 | 0.76146789  | 0.824561404 | 0.737704918 | 0.714285714 | 0.788461538 | 0.722772277 | 0.708333333 | 0.662790689 |
| UZ.P085 | 0.706422018 | 0.842975207 | 0.779411765 | 0.705882353 | 0.831858407 | 0.738317757 | 0.7         | 0.698924731 |
| UZ.P057 | 0.717171717 | 0.864864865 | 0.745454545 | 0.744680851 | 0.843137255 | 0.75257732  | 0.739130435 | 0.770114943 |
| UZ.P086 | 0.806818182 | 0.905263158 | 0.694444444 | 0.8         | 0.870588235 | 0.807228916 | 0.825       | 0.802816901 |
| UZ.P087 | 0.862068966 | 0.649484536 | 0.911764706 | 0.77        | 0.648351648 | 0.844036697 | 0.858490566 | 0.88        |
| UZ.P089 | 0.887640449 | 0.923076923 | 0.633333333 | 0.846153846 | 0.888888889 | 0.879518072 | 0.857142857 | 0.855072464 |
| UZ.P091 | 0.829545455 | 0.903225806 | 0.783783784 | 0.825       | 0.880952381 | 0.872093023 | 0.805194805 | 0.797101449 |
| UZ.P092 | 0.787878788 | 0.855769231 | 0.76        | 0.78021978  | 0.793478261 | 0.747252747 | 0.761363636 | 0.765432099 |
| UZ.P093 | 0.678990983 | 0.734513274 | 0.71641791  | 0.59375     | 0.714285714 | 0.685714286 | 0.683168317 | 0.694736842 |
| UZ.P094 | 0.792349727 | 0.543046358 | 0.883561644 | 0.74556213  | 0.623376623 | 0.778409091 | 0.779069767 | 0.781818182 |
| UZ.P095 | 0.743421053 | 0.8125      | 0.853448276 | 0.77027027  | 0.802631579 | 0.75        | 0.767123288 | 0.760869565 |
| UZ.P096 | 0.659574468 | 0.820754717 | 0.740740741 | 0.685393258 | 0.818181818 | 0.709677419 | 0.736263736 | 0.641025641 |
| UZ.P097 | 0.651376147 | 0.822580645 | 0.780821918 | 0.633663366 | 0.789473684 | 0.603960396 | 0.67961165  | 0.556818182 |
| UZ.P058 | 0.620689565 | 0.728       | 0.8         | 0.63963964  | 0.731092437 | 0.660869565 | 0.726495726 | 0.678899083 |
| UZ.P098 | 0.929411765 | 0.953488372 | 0.777777778 | 0.891891892 | 0.962025316 | 0.9375      | 0.918918919 | 0.940298507 |
| UZ.P099 | 0.698412698 | 0.606837607 | 0.76744186  | 0.616071429 | 0.663973103 | 0.64957265  | 0.692307692 | 0.678899083 |
| UZ.P100 | 0.700854701 | 0.792       | 0.763157895 | 0.756521739 | 0.808333333 | 0.684684685 | 0.763157895 | 0.730769231 |
| UZ.P101 | 0.787671233 | 0.545454545 | 0.866666667 | 0.727272727 | 0.564102564 | 0.751824818 | 0.751824818 | 0.782945736 |
| UZ.P102 | 0.801980198 | 0.823529412 | 0.788461538 | 0.727272727 | 0.769230769 | 0.736263736 | 0.764044944 | 0.797619048 |
| UZ.P103 | 0.8125      | 0.610294118 | 0.918032787 | 0.716312057 | 0.607692308 | 0.805194805 | 0.837662338 | 0.819444444 |
| UZ.P104 | 0.705357143 | 0.809917355 | 0.791666667 | 0.740740741 | 0.807017544 | 0.663461538 | 0.735849057 | 0.697916667 |
| UZ.P105 | 0.778688525 | 0.642201835 | 0.87654321  | 0.75        | 0.6         | 0.777777778 | 0.767857143 | 0.759615385 |
| UZ.P106 | 0.704761905 | 0.805309735 | 0.741935484 | 0.663157895 | 0.79047619  | 0.686868687 | 0.670212766 | 0.666666667 |
| UZ.P107 | 0.813333333 | 0.638461538 | 0.857142857 | 0.757352941 | 0.637096774 | 0.797202797 | 0.807142857 | 0.846715328 |
| UZ.P108 | 0.849206349 | 0.654205607 | 0.898734177 | 0.763636364 | 0.568421053 | 0.801724138 | 0.86440678  | 0.831775701 |
| UZ.P110 | 0.837837838 | 0.623655914 | 0.873015873 | 0.775510204 | 0.695652174 | 0.794117647 | 0.757894737 | 0.815217391 |
| UZ.P111 | 0.867816092 | 0.537313433 | 0.938931298 | 0.839506173 | 0.607407407 | 0.869822485 | 0.858895706 | 0.872611465 |
| UZ.P112 | 0.774774775 | 0.826086957 | 0.721311475 | 0.704081633 | 0.778846154 | 0.737864078 | 0.737373737 | 0.739130435 |
| UZ.P113 | 0.824742268 | 0.77173913  | 0.782608696 | 0.75        | 0.75        | 0.786516854 | 0.816091954 | 0.794871795 |
| UZ.P114 | 0.810606061 | 0.655172414 | 0.821428571 | 0.786885246 | 0.654545455 | 0.782258065 | 0.79338843  | 0.838983051 |
| UZ.P060 | 0.741071429 | 0.803418803 | 0.742424242 | 0.718446602 | 0.8         | 0.714285714 | 0.7         | 0.698924731 |
| UZ.P061 | 0.6         | 0.785714286 | 0.8         | 0.632075472 | 0.771186441 | 0.62962963  | 0.638095238 | 0.574468085 |
| UZ.P063 | 0.772727273 | 0.885416667 | 0.717948718 | 0.746835443 | 0.887640449 | 0.771084337 | 0.772151899 | 0.705882353 |
| UZ.P064 | 0.596330275 | 0.666666667 | 0.8125      | 0.615384615 | 0.736842105 | 0.586538462 | 0.621359223 | 0.628865979 |
| UZ.P124 | 0.854166667 | 0.898989899 | 0.869565217 | 0.865168539 | 0.913978495 | 0.857142857 | 0.862689666 | 0.8575      |
| UZ.P127 | 0.82        | 0.896226415 | 0.846153846 | 0.840425532 | 0.91        | 0.808510638 | 0.824175824 | 0.819277100 |
| UZ.P128 | 0.776595745 | 0.871287129 | 0.787234043 | 0.76744186  | 0.872340426 | 0.73255814  | 0.804597701 | 0.733333333 |
| UZ.P129 | 0.880434783 | 0.9375      | 0.902439024 | 0.853658537 | 0.931818182 | 0.885057471 | 0.891566265 | 0.893333333 |
| UZ.P130 | 0.829787234 | 0.887755102 | 0.790697674 | 0.783132523 | 0.89010989  | 0.818181818 | 0.792682927 | 0.8         |
| UZ.P131 | 0.822916667 | 0.901960784 | 0.829787234 | 0.818181818 | 0.893617021 | 0.824175824 | 0.827586207 | 0.8375      |
| UZ.P132 | 0.896551724 | 0.956043956 | 0.774193548 | 0.884615385 | 0.925925926 | 0.875       | 0.881578947 | 0.865671642 |
| UZ.P133 | 0.891304348 | 0.89010989  | 0.8         | 0.879518072 | 0.86583659  | 0.88372093  | 0.87654321  | 0.861111111 |
| UZ.P115 | 0.768518519 | 0.871794872 | 0.790322581 | 0.734693878 | 0.872727273 | 0.690721649 | 0.755102041 | 0.730337079 |
| UZ.P134 | 0.8125      | 0.742857143 | 0.880597015 | 0.747474747 | 0.784313725 | 0.778846154 | 0.826923077 | 0.822916667 |
| UZ.P135 | 0.94047619  | 0.976744186 | 0.931034483 | 0.961038961 | 0.987341772 | 0.949367089 | 0.945945946 | 0.954545455 |
| UZ.P136 | 0.821052632 | 0.878787879 | 0.85106383  | 0.759036145 | 0.904255319 | 0.835164835 | 0.852272727 | 0.835443038 |
| UZ.P137 | 0.887640449 | 0.923076923 | 0.757575758 | 0.860759494 | 0.902439024 | 0.851851852 | 0.871794872 | 0.871428571 |
| UZ.P138 | 0.857142857 | 0.855670103 | 0.875       | 0.788235294 | 0.773809524 | 0.781609195 | 0.865168539 | 0.773333333 |
| UZ.P139 | 0.909090909 | 0.608333333 | 0.952380952 | 0.864285714 | 0.663865546 | 0.890410959 | 0.902097902 | 0.935251799 |
| UZ.P140 | 0.848       | 0.598039216 | 0.76146789  | 0.598039216 | 0.62244898  | 0.810344828 | 0.863247863 | 0.862385321 |
| UZ.P141 | 0.801724138 | 0.698113208 | 0.890410959 | 0.737864078 | 0.785046729 | 0.733333333 | 0.803738318 | 0.81        |
| UZ.P142 | 0.80952381  | 0.862385321 | 0.883333333 | 0.851485149 | 0.873786408 | 0.785714286 | 0.882352941 | 0.846153846 |
| UZ.P143 | 0.927710843 | 0.976744186 | 0.851851852 | 0.933333333 | 0.961038961 | 0.949367089 | 0.96        | 0.938461538 |
| UZ.P116 | 0.752808989 | 0.910891089 | 0.847826087 | 0.813953488 | 0.926315789 | 0.779069767 | 0.823529412 | 0.802631579 |
| UZ.P144 | 0.819047619 | 0.861111111 | 0.9         | 0.789473684 | 0.85        | 0.854368932 | 0.892156863 | 0.804597701 |
| UZ.P145 | 0.841584158 | 0.945454545 | 0.865384615 | 0.826086957 | 0.961538462 | 0.878787879 | 0.872340426 | 0.897727273 |
| UZ.P146 | 0.882352941 | 0.651785714 | 0.931818182 | 0.846771494 | 0.723214286 | 0.876923077 | 0.88976378  | 0.909090909 |
| UZ.P147 | 0.886363636 | 0.956989247 | 0.956989247 | 0.918918919 | 0.901234568 | 0.952941176 | 0.917647059 | 0.9125      |
| UZ.P148 | 0.782608696 | 0.863945578 | 0.842105263 | 0.776923077 | 0.856115108 | 0.763358779 | 0.819548872 | 0.834645669 |
| UZ.P149 | 0.836538462 | 0.899082569 | 0.894736842 | 0.845360825 | 0.88        | 0.883495146 | 0.87755102  | 0.865168539 |
| UZ.P150 | 0.891304348 | 0.89010989  | 0.842105263 | 0.851851852 | 0.905882353 | 0.857142857 | 0.890243902 | 0.891891892 |
| UZ.P151 | 0.901098901 | 0.946808511 | 0.833333333 | 0.890243902 | 0.929411765 | 0.853658537 | 0.8875      | 0.873239437 |
| UZ.P152 | 0.767241379 | 0.796610169 | 0.881578947 | 0.747663551 | 0.792792793 | 0.754545455 | 0.810810811 | 0.85046729  |
| UZ.P153 | 0.849056604 | 0.947826087 | 0.877192982 | 0.835051546 | 0.943925234 | 0.873786408 | 0.900909099 | 0.879120879 |
| UZ.P117 | 0.826086957 | 0.919191919 | 0.80952381  | 0.807228916 | 0.9         | 0.827586207 | 0.858823529 | 0.810810811 |
| UZ.P154 | 0.91        | 0.744186047 | 0.9375      | 0.863636364 | 0.795180723 | 0.904255319 | 0.898876404 | 0.927710843 |
| UZ.P155 | 0.89        | 0.804347826 | 0.918367347 | 0.840909091 | 0.756097561 | 0.858695652 | 0.888888889 | 0.903614458 |
| UZ.P156 | 0.793814433 | 0.945454545 | 0.843137255 | 0.813186813 | 0.930693069 | 0.831578947 | 0.860215054 | 0.858823529 |
| UZ.P157 | 0.833333333 | 0.936936937 | 0.849056604 | 0.829787234 | 0.942307692 | 0.835051546 | 0.863157895 | 0.835294118 |
| UZ.P158 | 0.87254902  | 0.934579439 | 0.903846154 | 0.847826087 | 0.960784314 | 0.87628866  | 0.88172043  | 0.882352941 |
| UZ.P159 | 0.8125      | 0.9         | 0.880597015 | 0.72277228  | 0.912280702 | 0.77846154  | 0.838095238 | 0.810526316 |
| UZ.P160 | 0.858490566 | 0.823529412 | 0.875       | 0.821052632 | 0.833333333 | 0.838383838 | 0.854166667 | 0.865168539 |
| UZ.P161 | 0.876404494 | 0.862068966 | 0.833333333 | 0.8625      | 0.848101266 | 0.853658537 | 0.8875      | 0.873239437 |
| UZ.P162 | 0.88034188  | 0.631578947 | 0           |             |             |             |             |             |



jaccard

Table with 10 columns labeled UZ.P074, UZ.P056, UZ.P075, UZ.P076, UZ.P077, UZ.P079, UZ.P080, and UZ.P081. Each cell contains a numerical value representing a jaccard index. The values range from approximately 0.625 to 0.999, with many values being 0.85 or higher. Some cells contain 'NA' (Not Available).

jaccard

| UZ.P083     | UZ.P084     | UZ.P085     | UZ.P057     | UZ.P086     | UZ.P087     | UZ.P089     | UZ.P091      |
|-------------|-------------|-------------|-------------|-------------|-------------|-------------|--------------|
| 0,68        | 0,76146789  | 0,706422018 | 0,717171717 | 0,806818182 | 0,862068966 | 0,887640449 | 0,829545455  |
| 0,860869565 | 0,824561404 | 0,842975207 | 0,864864865 | 0,905263158 | 0,649484536 | 0,923076923 | 0,903225806  |
| 0,724137931 | 0,737704918 | 0,779411765 | 0,745454545 | 0,694444444 | 0,911764706 | 0,633333333 | 0,783783784  |
| 0,71875     | 0,714285714 | 0,705882353 | 0,744680851 | 0,8         | 0,77        | 0,846153846 | 0,825        |
| 0,828571429 | 0,788461538 | 0,831858407 | 0,843137255 | 0,870588235 | 0,648351648 | 0,888888889 | 0,880952381  |
| 0,701030928 | 0,722727227 | 0,738317757 | 0,75257732  | 0,807228916 | 0,844036697 | 0,879518072 | 0,872039023  |
| 0,726315789 | 0,708333333 | 0,7         | 0,739130435 | 0,825       | 0,858490566 | 0,857142857 | 0,805194805  |
| 0,727272727 | 0,662790698 | 0,698924731 | 0,770114943 | 0,802816901 | 0,888       | 0,855072464 | 0,7971101449 |
| 0,863636364 | 0,842696629 | 0,802197802 | 0,8125      | 0,841269841 | 0,591549296 | 0,901639344 | 0,890625     |
| 0,811111111 | 0,735632184 | 0,698629213 | 0,725       | 0,823529412 | 0,896907216 | 0,861538462 | 0,885714286  |
| 0,724489796 | 0,732673267 | 0,759259259 | 0,8         | 0,804878049 | 0,762376238 | 0,85        | 0,843373494  |
| 0,768292883 | 0,649350649 | 0,69047619  | 0,72        | 0,786885246 | 0,902173913 | 0,847457627 | 0,838708677  |
| 0,678571429 | 0,719101124 | 0,666666667 | 0,722891566 | 0,782608696 | 0,867346939 | 0,818181818 | 0,845070423  |
| 0,853932584 | 0,846153846 | 0,819148936 | 0,7875      | 0,828125    | 0,756097561 | 0,85        | 0,876923077  |
| 0,753846154 | 0,727272727 | 0,783783784 | 0,711864407 | 0,714285714 | 0,85915493  | 0,769230769 | 0,844444444  |
| 0,670731707 | 0,712643675 | 0,744680851 | 0,716049383 | 0,828571429 | 0,931372549 | 0,865671642 | 0,805970149  |
| NA          | 0,747126437 | 0,747126437 | 0,698630137 | 0,783333333 | 0,850574713 | 0,824561404 | 0,754385965  |
| 0,7125 NA   | 0,727272727 | 0,727272727 | 0,775       | 0,8125      | 0,892473118 | 0,833333333 | 0,825396825  |
| 0,747126437 | 0,727272727 | 0,666666667 | 0,666666667 | 0,757575758 | 0,827956989 | 0,793650794 | 0,75         |
| 0,698630137 | 0,775       | 0,666666667 | NA          | 0,692307692 | 0,692307692 | 0,841463415 | 0,821428571  |
| 0,783333333 | 0,8125      | 0,757575758 | 0,692307692 | 0,757575758 | NA          | 0,841269841 | 0,810810811  |
| 0,850574713 | 0,892473118 | 0,827956989 | 0,841463415 | 0,841269841 | NA          | 0,919354839 | 0,890625     |
| 0,824561404 | 0,833333333 | 0,793650794 | 0,784313725 | 0,709677419 | 0,8125      | 0,919354839 | 0,8125       |
| 0,754385965 | 0,825396825 | 0,75        | 0,821428571 | 0,810810811 | 0,890625    | 0,8125 NA   | 0,843137255  |
| 0,794520548 | 0,77027027  | 0,756410256 | 0,779411765 | 0,755102041 | 0,794520548 | 0,829787234 | 0,843137255  |
| 0,727272727 | 0,722222222 | 0,67032967  | 0,755813953 | 0,802816901 | 0,782608696 | 0,855072464 | 0,814285714  |
| 0,847560976 | 0,807453416 | 0,835294118 | 0,864197531 | 0,890410959 | 0,714285714 | 0,916666667 | 0,904109589  |
| 0,776923077 | 0,808823529 | 0,782608696 | 0,80620155  | 0,871794872 | 0,839416058 | 0,913793103 | 0,898305085  |
| 0,746666667 | 0,706666667 | 0,743902439 | 0,763888889 | 0,759259259 | 0,86746988  | 0,849056604 | 0,796296296  |
| 0,722222222 | 0,674157303 | 0,708333333 | 0,720930233 | 0,777777778 | 0,87254902  | 0,828571429 | 0,853333333  |
| 0,72        | 0,798165138 | 0,70754717  | 0,731958763 | 0,797619048 | 0,757281553 | 0,869047619 | 0,835294118  |
| 0,886792453 | 0,931034483 | 0,885245902 | 0,826086957 | 0,769230769 | 0,964912281 | 0,818181818 | 0,846153846  |
| 0,777777778 | 0,663366367 | 0,694444444 | 0,778846154 | 0,820224719 | 0,754716981 | 0,875       | 0,855555556  |
| 0,695652174 | 0,71875     | 0,759615385 | 0,76344086  | 0,776315789 | 0,846153846 | 0,84        | 0,848101266  |
| 0,791666667 | 0,806451613 | 0,777777778 | 0,81359322  | 0,854368932 | 0,644859813 | 0,912621359 | 0,862745098  |
| 0,797297297 | 0,789473684 | 0,775       | 0,764705882 | 0,807692308 | 0,858974359 | 0,857142857 | 0,867924528  |
| 0,846715328 | 0,841726619 | 0,840277778 | 0,875       | 0,88034188  | 0,637931034 | 0,931623932 | 0,906779661  |
| 0,715909091 | 0,725274725 | 0,767676768 | 0,744186047 | 0,837837838 | 0,892156863 | 0,888888889 | 0,864864865  |
| 0,841584158 | 0,811881188 | 0,8         | 0,845380825 | 0,888888889 | 0,7         | 0,936708861 | 0,842105263  |
| 0,746987952 | 0,741176471 | 0,701149425 | 0,730769231 | 0,850746269 | 0,831460674 | 0,890625    | 0,80952381   |
| 0,841269841 | 0,826771654 | 0,843283582 | 0,853658537 | 0,855769231 | 0,684684685 | 0,902912621 | 0,906542056  |
| 0,846938776 | 0,84        | 0,838095238 | 0,863157895 | 0,868421053 | 0,62195122  | 0,888888889 | 0,864864865  |
| 0,845238095 | 0,837209302 | 0,822222222 | 0,820512821 | 0,852459016 | 0,689189189 | 0,915254237 | 0,885245902  |
| 0,907284768 | 0,894736842 | 0,87012987  | 0,904109589 | 0,904761905 | 0,68        | 0,952380952 | 0,929133858  |
| 0,7         | 0,741176471 | 0,701149425 | 0,7625      | 0,796875    | 0,818181818 | 0,85483871  | 0,770491803  |
| 0,811594203 | 0,866666667 | 0,786666667 | 0,833333333 | 0,777777778 | 0,633333333 | 0,804878049 | 0,822222222  |
| 0,798076923 | 0,79245283  | 0,792792797 | 0,823529412 | 0,847058824 | 0,655913978 | 0,87804878  | 0,857142857  |
| 0,73255814  | 0,697674419 | 0,717391304 | 0,683544304 | 0,757575758 | 0,815217391 | 0,848484848 | 0,873239437  |
| 0,70212766  | 0,711340206 | 0,635416667 | 0,714285714 | 0,8125      | 0,78        | 0,844155844 | 0,851851852  |
| 0,711864407 | 0,704918033 | 0,768115942 | 0,709090909 | 0,775       | 0,929577465 | 0,771428571 | 0,794871795  |
| 0,739583333 | 0,694736842 | 0,659793814 | 0,752688172 | 0,794871795 | 0,765306122 | 0,857142857 | 0,805194805  |
| 0,885714286 | 0,890410959 | 0,84        | 0,762711864 | 0,866666667 | 0,945945946 | 0,928571429 | 0,860465116  |
| 0,837837838 | 0,844155844 | 0,797468354 | 0,772727272 | 0,865384615 | 0,963855422 | 0,918367347 | 0,903846154  |
| 0,76119403  | 0,788732394 | 0,722222222 | 0,7         | 0,727272727 | 0,878378378 | 0,837209302 | 0,85106387   |
| 0,85483871  | 0,878787879 | 0,857142857 | 0,8         | 0,871794872 | 0,971014493 | 0,882352941 | 0,923076923  |
| 0,818181818 | 0,826086957 | 0,774647887 | 0,783333333 | 0,840909091 | 0,916666667 | 0,902439024 | 0,886363636  |
| 0,85915493  | 0,816901408 | 0,75        | 0,754098361 | 0,772727273 | 0,905405405 | 0,88372093  | 0,869565217  |
| 0,877192982 | 0,844827586 | 0,859375    | 0,82        | 0,766666667 | 0,984126984 | 0,851851852 | 0,90625      |
| 0,888888889 | 0,876923077 | 0,871428571 | 0,773584906 | 0,771428571 | 0,923076923 | 0,84375     | 0,891891892  |
| 0,705128205 | 0,761904762 | 0,791208791 | 0,666666667 | 0,786885246 | 0,902173913 | 0,866666667 | 0,875        |
| 0,852272727 | 0,844444444 | 0,764044944 | 0,784810127 | 0,825396825 | 0,78313253  | 0,885245902 | 0,875        |
| 0,944444444 | 0,947368421 | 0,935483871 | 0,893617021 | 0,888888889 | 0,982142857 | 0,909090909 | 0,923076923  |
| 0,805970149 | 0,847222222 | 0,797297297 | 0,728813559 | 0,795454545 | 0,888888889 | 0,880952381 | 0,866666667  |
| 0,803571429 | 0,813595322 | 0,830769231 | 0,807692308 | 0,787878788 | 0,936507937 | 0,785714286 | 0,882352941  |
| 0,823529412 | 0,797101449 | 0,797297297 | 0,790322581 | 0,76744186  | 0,769230769 | 0,880952381 | 0,866666667  |
| 0,929133858 | 0,946969697 | 0,901515152 | 0,926229508 | 0,920792079 | 0,64        | 0,948979592 | 0,940594059  |
| 0,891089109 | 0,883495146 | 0,847619048 | 0,824175824 | 0,851351351 | 0,682352941 | 0,946666667 | 0,878378378  |
| 0,849462366 | 0,865979381 | 0,791666667 | 0,8         | 0,84057971  | 0,797752809 | 0,927536232 | 0,916666667  |
| 0,851851852 | 0,870588235 | 0,866666667 | 0,826666667 | 0,862068966 | 0,892857143 | 0,928571429 | 0,915254237  |
| 0,924528302 | 0,888888889 | 0,918032787 | 0,869565217 | 0,846153846 | 0,982142857 | 0,909090909 | 0,88         |
| 0,820895522 | 0,876712329 | 0,794520548 | 0,745762712 | 0,790697674 | 0,960526316 | 0,930232558 | 0,863636364  |
| 0,835443038 | 0,895348837 | 0,852272727 | 0,791666667 | 0,859649123 | 0,891566265 | 0,964912281 | 0,894736842  |
| 0,881578947 | 0,913580247 | 0,880952381 | 0,84057971  | 0,862745098 | 0,988095238 | 0,916666667 | 0,923076923  |
| 0,909090909 | 0,901785714 | 0,868421053 | 0,883495146 | 0,879518072 | 0,651685393 | 0,951807229 | 0,941860465  |
| 0,935483871 | 0,938461538 | 0,928571429 | 0,849056604 | 0,916666667 | 0,952380952 | 0,935483871 | 0,878787879  |
| 0,763636364 | 0,801724138 | 0,81147541  | 0,764150943 | 0,87628866  | 0,866666667 | 0,880434783 | 0,885416667  |
| 0,844155844 | 0,864197531 | 0,833333333 | 0,782608696 | 0,807692308 | 0,873417722 | 0,923076923 | 0,888888889  |
| 0,870967742 | 0,859375    | 0,838235294 | 0,796296296 | 0,805555556 | 0,90625     | 0,878787879 | 0,948717949  |
| 0,866666667 | 0,85483871  | 0,867647059 | 0,833333333 | 0,861111111 | 0,985074627 | 0,870967742 | 0,885714286  |
| 0,819148936 | 0,824742268 | 0,8         | 0,738095238 | 0,849315068 | 0,793478261 | 0,916666667 | 0,861111111  |
| 0,875       | 0,905882353 | 0,862068966 | 0,819444444 | 0,875       | 0,953488372 | 0,924528302 | 0,890909091  |
| 0,8125      | 0,784615385 | 0,802816901 | 0,685185185 | 0,804878049 | 0,929577465 | 0,837837838 | 0,853658537  |
| 0,915492958 | 0,933333333 | 0,883116883 | 0,892307692 | 0,863636364 | 0,574074074 | 0,928829288 | 0,909090909  |
| 0,902777778 | 0,876712329 | 0,886075949 | 0,861538462 | 0,844444444 | 0,746031746 | 0,87804878  | 0,913043478  |
| 0,835616438 | 0,913580247 | 0,825       | 0,709677419 | 0,816326531 | 0,950617284 | 0,916666667 | 0,88         |
| 0,808219178 | 0,888888889 | 0,829268293 | 0,757575758 | 0,823529412 | 0,976470588 | 0,897959184 | 0,884615385  |
| 0,878378378 | 0,911392405 | 0,917647059 | 0,869565217 | 0,901960784 | 0,987804878 | 0,958333333 | 0,897959184  |
| 0,797619048 | 0,844444444 | 0,829878234 | 0,829268293 | 0,8787      |             |             |              |

jaccard

| UZ.P092     | UZ.P093     | UZ.P094     | UZ.P095     | UZ.P096     | UZ.P097     | UZ.P098     | UZ.P098     |
|-------------|-------------|-------------|-------------|-------------|-------------|-------------|-------------|
| 0,787878788 | 0,678899083 | 0,792349727 | 0,743421053 | 0,659574468 | 0,651376147 | 0,620689655 | 0,929411765 |
| 0,855769231 | 0,734513274 | 0,543046358 | 0,8125      | 0,820754717 | 0,822580645 | 0,728       | 0,953488372 |
| 0,76        | 0,71641791  | 0,883561644 | 0,853448276 | 0,740740741 | 0,780821918 | 0,8         | 0,777777778 |
| 0,78021978  | 0,59375     | 0,74556213  | 0,77027027  | 0,685393258 | 0,633663366 | 0,63963964  | 0,891891892 |
| 0,793478261 | 0,714285714 | 0,623376623 | 0,802631579 | 0,818181818 | 0,789473684 | 0,731092437 | 0,962025316 |
| 0,747252747 | 0,685714286 | 0,778409091 | 0,75        | 0,709677419 | 0,603960396 | 0,660869565 | 0,9375      |
| 0,761363636 | 0,683168317 | 0,779069767 | 0,767123288 | 0,736263736 | 0,679611655 | 0,726495726 | 0,918918919 |
| 0,765432099 | 0,694736842 | 0,781818182 | 0,760869565 | 0,641025641 | 0,556818182 | 0,727272727 | 0,940298507 |
| 0,826666667 | 0,697674419 | 0,722972973 | 0,847826087 | 0,825       | 0,838383838 | 0,780952381 | 0,886792453 |
| 0,765233766 | 0,747368421 | 0,826347305 | 0,797101449 | 0,78313253  | 0,659340659 | 0,714285714 | 0,935483871 |
| 0,79787234  | 0,682692308 | 0,687116564 | 0,713286713 | 0,692307692 | 0,703703704 | 0,669565217 | 0,923076923 |
| 0,797297297 | 0,686046512 | 0,8125      | 0,787878788 | 0,602941176 | 0,696629213 | 0,683673469 | 0,888888889 |
| 0,730769231 | 0,633333333 | 0,795180723 | 0,740740741 | 0,670886076 | 0,584269663 | 0,650485437 | 0,90625     |
| 0,783783784 | 0,787234043 | 0,767741935 | 0,789473684 | 0,829268293 | 0,793814433 | 0,849557522 | 0,910714286 |
| 0,810344828 | 0,792207792 | 0,866666667 | 0,842975207 | 0,728813559 | 0,736842105 | 0,788888889 | 0,918918919 |
| 0,7875      | 0,726315789 | 0,842105263 | 0,8         | 0,728395062 | 0,606741573 | 0,731481481 | 0,9375      |
| 0,794520548 | 0,727272727 | 0,847560976 | 0,776923077 | 0,746666667 | 0,722222222 | 0,72        | 0,886792453 |
| 0,77027027  | 0,722222222 | 0,807453416 | 0,808823529 | 0,706666667 | 0,674157303 | 0,798165138 | 0,931034483 |
| 0,756410256 | 0,67032967  | 0,835294118 | 0,782608696 | 0,743902439 | 0,708333333 | 0,70754717  | 0,885245902 |
| 0,779411765 | 0,755813953 | 0,864197531 | 0,80620155  | 0,763888889 | 0,720930233 | 0,731958763 | 0,826086957 |
| 0,755102041 | 0,802816901 | 0,890410959 | 0,871794872 | 0,759259259 | 0,777777778 | 0,797619048 | 0,769230769 |
| 0,794520548 | 0,782608696 | 0,714285714 | 0,839416058 | 0,867469888 | 0,87254902  | 0,757281553 | 0,964912281 |
| 0,829787234 | 0,855072464 | 0,916666667 | 0,913793103 | 0,849056604 | 0,828571429 | 0,869047619 | 0,818181818 |
| 0,843137255 | 0,814285714 | 0,904109589 | 0,898305085 | 0,796296296 | 0,853333333 | 0,835294118 | 0,846153846 |
| 0,780487805 | 0,780487805 | 0,82871457  | 0,824       | 0,738461538 | 0,743902439 | 0,725274725 | 0,906976744 |
| 0,780487805 | NA          | 0,711538462 | 0,760869565 | 0,675       | 0,704081633 | 0,666666667 | 0,907692308 |
| 0,82781457  | 0,711538462 | NA          | 0,666666667 | 0,819354839 | 0,813953488 | 0,738372093 | 0,972222222 |
| 0,824       | 0,760869565 | 0,666666667 | NA          | 0,756097561 | 0,756097561 | 0,739130435 | 0,946428571 |
| 0,738461538 | 0,675       | 0,819354839 | 0,756097561 | NA          | 0,686746988 | 0,686746988 | 0,872340426 |
| 0,743902439 | 0,704081633 | 0,813953488 | 0,739130435 | 0,686746988 | NA          | 0,723214286 | 0,927536232 |
| 0,725274725 | 0,666666667 | 0,738372093 | 0,761589404 | 0,688172043 | 0,723214286 | NA          | 0,925925926 |
| 0,906976744 | 0,907692308 | 0,972222222 | 0,946428571 | 0,872340426 | 0,927536232 | 0,925925926 | NA          |
| 0,775510204 | 0,56        | 0,692307692 | 0,775641026 | 0,714285714 | 0,699115044 | 0,67768595  | 0,916666667 |
| 0,744186047 | 0,754716981 | 0,69375     | 0,664179104 | 0,719101124 | 0,714285714 | 0,724137931 | 0,932432432 |
| 0,801801802 | 0,702479339 | 0,555555556 | 0,748466258 | 0,780701754 | 0,796992481 | 0,658914729 | 0,93877551  |
| 0,777777778 | 0,7375      | 0,828947368 | 0,834645669 | 0,76119403  | 0,746987952 | 0,741935484 | 0,88372093  |
| 0,81300813  | 0,721804511 | 0,538461538 | 0,74566474  | 0,839694656 | 0,838926174 | 0,776315789 | 0,982608696 |
| 0,797619048 | 0,711340206 | 0,797619048 | 0,735294118 | 0,679012346 | 0,652631579 | 0,694444444 | 0,909090909 |
| 0,806818182 | 0,670103093 | 0,662337662 | 0,802721088 | 0,793478261 | 0,788990826 | 0,705357143 | 0,944444444 |
| 0,789473684 | 0,681818182 | 0,81595092  | 0,81884058  | 0,638888889 | 0,692307692 | 0,718446602 | 0,913793103 |
| 0,781818182 | 0,785625    | 0,582822209 | 0,710691824 | 0,842975207 | 0,824817518 | 0,748201439 | 0,95        |
| 0,78313253  | 0,75        | 0,696774194 | 0,813793103 | 0,836965622 | 0,803738318 | 0,794871795 | 0,956521739 |
| 0,866666667 | 0,775280899 | 0,751677852 | 0,835820896 | 0,833333333 | 0,833333333 | 0,774509804 | 0,923076923 |
| 0,858208955 | 0,804054054 | 0,469879518 | 0,755555556 | 0,888111888 | 0,860759494 | 0,801242236 | 0,975206612 |
| 0,704225352 | 0,711111111 | 0,808641975 | 0,746153846 | 0,775       | 0,747368421 | 0,718446602 | 0,93220339  |
| 0,727272727 | 0,794871795 | 0,8125      | 0,853658537 | 0,830769231 | 0,7875      | 0,7875      | 0,891891892 |
| 0,810526316 | 0,719626168 | 0,636942675 | 0,765100671 | 0,833333333 | 0,803418803 | 0,776       | 0,923076923 |
| 0,756410256 | 0,712765957 | 0,8256108   | 0,717557252 | 0,743902439 | 0,734693878 | 0,719626168 | 0,920634921 |
| 0,720930233 | 0,723809524 | 0,758823529 | 0,725352113 | 0,681818182 | 0,587628866 | 0,660714286 | 0,934210526 |
| 0,836363636 | 0,777777778 | 0,89261745  | 0,855932203 | 0,75        | 0,7         | 0,804597701 | 0,870967742 |
| 0,747126437 | 0,6         | 0,734939759 | 0,75862069  | 0,662790698 | 0,612244898 | 0,62037037  | 0,933333333 |
| 0,918032787 | 0,831168831 | 0,922580645 | 0,904       | 0,857142857 | 0,8375      | 0,884210526 | 0,806451613 |
| 0,825396825 | 0,886363636 | 0,919753086 | 0,901515152 | 0,857142857 | 0,78313253  | 0,824742268 | 0,977272727 |
| 0,754385965 | 0,766233766 | 0,868421053 | 0,836065574 | 0,758064516 | 0,710526316 | 0,819149896 | 0,864864865 |
| 0,843137255 | 0,847222222 | 0,933333333 | 0,916666667 | 0,839285714 | 0,853333333 | 0,887640449 | 0,928571429 |
| 0,862089666 | 0,815789474 | 0,901315789 | 0,867768595 | 0,8         | 0,807692308 | 0,822222222 | 0,911764706 |
| 0,921875    | 0,8375      | 0,91025641  | 0,870967742 | 0,770491803 | 0,8         | 0,864583333 | 0,857142857 |
| 0,869565217 | 0,882352941 | 0,944827586 | 0,921052632 | 0,884615385 | 0,871428571 | 0,87804878  | 0,904761905 |
| 0,84        | 0,891891892 | 0,895833333 | 0,897435897 | 0,857142857 | 0,866666667 | 0,898876404 | 0,791666667 |
| 0,813333333 | 0,784946237 | 0,862275449 | 0,796992481 | 0,766233766 | 0,725274725 | 0,735294118 | 0,909090909 |
| 0,828947368 | 0,77173913  | 0,8125      | 0,84057971  | 0,8125      | 0,791666667 | 0,735294118 | 0,928571429 |
| 0,928571429 | 0,954545455 | 0,971830986 | 0,964285714 | 0,959183673 | 0,956521739 | 0,963414634 | 0,857142857 |
| 0,807017544 | 0,820512821 | 0,880794702 | 0,905511811 | 0,84375     | 0,797468354 | 0,8         | 0,885714286 |
| 0,804347826 | 0,855072464 | 0,931506849 | 0,913793103 | 0,87037037  | 0,845070423 | 0,895348837 | 0,869565217 |
| 0,716981132 | 0,789473684 | 0,850340136 | 0,879032258 | 0,825396825 | 0,797468354 | 0,838709677 | 0,945945946 |
| 0,882882883 | 0,84375     | 0,58490566  | 0,765822785 | 0,916666667 | 0,929078014 | 0,845070423 | 0,989361702 |
| 0,863636364 | 0,796116505 | 0,694805195 | 0,86        | 0,847826087 | 0,855855856 | 0,761061947 | 0,971014493 |
| 0,8125      | 0,833333333 | 0,804878049 | 0,839160839 | 0,865168539 | 0,767676768 | 0,794642857 | 0,952380952 |
| 0,875       | 0,846153846 | 0,883435583 | 0,857142857 | 0,824324324 | 0,826086957 | 0,836538462 | 0,96        |
| 0,928571429 | 0,938461538 | 0,971830986 | 0,954954955 | 0,9375      | 0,925373134 | 0,950617284 | 0,857142857 |
| 0,844827586 | 0,8625      | 0,901960784 | 0,87804878  | 0,822580645 | 0,794871795 | 0,824175824 | 0,848484848 |
| 0,888888889 | 0,844444444 | 0,86875     | 0,881481481 | 0,83787838  | 0,770114943 | 0,846153846 | 0,9375      |
| 0,971830986 | 0,885057471 | 0,93902439  | 0,892307692 | 0,887323944 | 0,837209302 | 0,913461538 | 0,9         |
| 0,838709677 | 0,821428571 | 0,633966928 | 0,790540541 | 0,893203883 | 0,902439024 | 0,825396825 | 0,987179487 |
| 0,981132075 | 0,931506849 | 0,945578231 | 0,940677966 | 0,909090909 | 0,890410959 | 0,931818182 | 1           |
| 0,830188679 | 0,825396825 | 0,783783784 | 0,75        | 0,818181818 | 0,811023622 | 0,802919708 | 0,93258427  |
| 0,884057971 | 0,83908046  | 0,866242038 | 0,84375     | 0,797101449 | 0,844444444 | 0,841584158 | 0,909090909 |
| 0,816326531 | 0,845070423 | 0,910958904 | 0,897435897 | 0,877192982 | 0,835616438 | 0,847058824 | 0,925925926 |
| 0,857142857 | 0,904109589 | 0,939189189 | 0,905172414 | 0,830188679 | 0,847222222 | 0,88372093  | 0,92        |
| 0,821428571 | 0,794117647 | 0,80952381  | 0,843537015 | 0,820224719 | 0,8         | 0,791304348 | 0,95523881  |
| 0,931506849 | 0,891304348 | 0,93452381  | 0,888059701 | 0,894736842 | 0,846153846 | 0,907407407 | 0,957446809 |
| 0,857142857 | 0,842105263 | 0,914473684 | 0,89342623  | 0,771292825 | 0,786666667 | 0,857142857 | 0,90625     |
| 0,839285714 | 0,844156844 | 0,839160839 | 0,876033058 | 0,907692308 | 0,904761905 | 0,833333333 | 0,971428571 |
| 0,824561404 | 0,818181818 | 0,833333333 | 0,896       | 0,876923077 | 0,880952381 | 0,861702128 | 0,914285714 |
| 0,910447761 | 0,845238095 | 0,93902439  | 0,892307692 | 0,855072464 | 0,80952381  | 0,87        | 0,871794872 |
| 0,897058824 | 0,862089666 | 0,926829268 | 0,868217054 | 0,890410959 | 0,8         | 0,85        | 0,930232558 |
| 0,924242424 | 0,895346837 | 0,938271605 | 0,916030534 | 0,884057971 | 0,860465116 | 0,89        | 0,95        |
| 0,8875      | 0,822916667 | 0,895348837 | 0,865248227 | 0,869047619 | 0,791666667 | 0,837837838 | 0,965517241 |
| 0,8         | 0,82581395  | 0,858974359 | 0,852713178 | 0,878378378 | 0,831460674 | 0,818181818 | 0,956521739 |
| 0,87012987  | 0,806451613 | 0,84057971  | 0,905172414 | 0,872727273 | 0,863013699 | 0,857142857 | 0,875       |
| 0,808823529 | 0,779069767 | 0,72972973  | 0,838235294 | 0,879518072 | 0,86        | 0,813084112 | 0,964285714 |
| 0,82276481  | 0,806122449 | 0,7875      | 0,845070423 | 0,821428571 | 0,762866598 | 0,768518519 | 0,950819672 |
| 0,830508475 | 0,851851852 | 0,924050633 | 0,861788618 | 0,828125    | 0,769230769 | 0,852631579 | 0,857142857 |
| 0,881355932 | 0,8         | 0,848275862 | 0,89516129  | 0,919672131 | 0,82278481  | 0,860215054 | 0,911764706 |
| 0,923076923 | 0,857142857 | 0,931972789 | 0,905172414 | 0,851851852 | 0,797101449 | 0,909090909 | 0,875       |
| 0,82758620  |             |             |             |             |             |             |             |

| UZ.P099     | UZ.P100     | UZ.P101     | UZ.P102     | UZ.P103     | UZ.P104     | UZ.P105     | UZ.P106     |
|-------------|-------------|-------------|-------------|-------------|-------------|-------------|-------------|
| 0.698412698 | 0.700854701 | 0.787671233 | 0.801980198 | 0.8125      | 0.705357143 | 0.778688525 | 0.704761905 |
| 0.606837607 | 0.792       | 0.545454545 | 0.823529412 | 0.610294118 | 0.809917355 | 0.642201835 | 0.805309735 |
| 0.76744186  | 0.763157895 | 0.866666667 | 0.788461538 | 0.918032787 | 0.791666667 | 0.87654321  | 0.741935484 |
| 0.616071429 | 0.756521739 | 0.727272727 | 0.727272727 | 0.716312057 | 0.740740741 | 0.507       | 0.663157895 |
| 0.663793103 | 0.808333333 | 0.564102564 | 0.769230769 | 0.607692308 | 0.807017544 | 0.6         | 0.79047619  |
| 0.64957265  | 0.684684685 | 0.751824818 | 0.736263736 | 0.805194805 | 0.663461538 | 0.777777778 | 0.686868687 |
| 0.692307692 | 0.763157895 | 0.751879699 | 0.764044944 | 0.837662338 | 0.735849057 | 0.767857143 | 0.670212766 |
| 0.678899083 | 0.730769231 | 0.782945736 | 0.797619048 | 0.819444444 | 0.697916667 | 0.759615385 | 0.666666667 |
| 0.666666667 | 0.823529412 | 0.619047619 | 0.746478873 | 0.704918033 | 0.822916667 | 0.623529412 | 0.776470588 |
| 0.758928571 | 0.754901961 | 0.821705426 | 0.8         | 0.87755102  | 0.762886598 | 0.841121495 | 0.738636364 |
| 0.622807018 | 0.681818182 | 0.682170543 | 0.774193548 | 0.78807947  | 0.767857143 | 0.732142857 | 0.747572816 |
| 0.656565657 | 0.67032967  | 0.81300813  | 0.767123288 | 0.864285714 | 0.658823529 | 0.770833333 | 0.67086076  |
| 0.711711712 | 0.663265306 | 0.809160305 | 0.734177215 | 0.826388889 | 0.622222222 | 0.780952381 | 0.707865169 |
| 0.803571429 | 0.767676768 | 0.743589744 | 0.833333333 | 0.73015873  | 0.85        | 0.760416667 | 0.847826087 |
| 0.810526316 | 0.811764706 | 0.844036697 | 0.793103448 | 0.851239669 | 0.763157895 | 0.847058824 | 0.802816901 |
| 0.741071429 | 0.71        | 0.824427481 | 0.819277108 | 0.871621222 | 0.659340659 | 0.833333333 | 0.670588235 |
| 0.777777778 | 0.695652174 | 0.791666667 | 0.797297297 | 0.846715328 | 0.715909091 | 0.841584158 | 0.746987952 |
| 0.663366337 | 0.71875     | 0.806451613 | 0.789473684 | 0.841726619 | 0.725274725 | 0.811881188 | 0.741176471 |
| 0.694444444 | 0.759615385 | 0.777777778 | 0.775       | 0.840277778 | 0.767676768 | 0.8         | 0.701149425 |
| 0.778846154 | 0.76344086  | 0.813559322 | 0.764705882 | 0.875       | 0.744186047 | 0.845360825 | 0.730769231 |
| 0.820224719 | 0.776315789 | 0.854368932 | 0.807692308 | 0.88034188  | 0.837837838 | 0.888888889 | 0.850746269 |
| 0.754716981 | 0.846153846 | 0.644859813 | 0.858974359 | 0.637931034 | 0.892156663 | 0.7         | 0.831460674 |
| 0.875       | 0.84        | 0.912621359 | 0.857142857 | 0.931623932 | 0.888888889 | 0.936708861 | 0.890625    |
| 0.855555556 | 0.848101266 | 0.862745098 | 0.867924528 | 0.906779661 | 0.864864865 | 0.842105263 | 0.80952381  |
| 0.775510204 | 0.744186047 | 0.801801802 | 0.777777778 | 0.81300813  | 0.797619048 | 0.806818182 | 0.789473684 |
| 0.56        | 0.754716981 | 0.702479339 | 0.7375      | 0.721804511 | 0.711340206 | 0.670103093 | 0.681818182 |
| 0.692307692 | 0.69375     | 0.555555556 | 0.828947368 | 0.538461538 | 0.797619048 | 0.662337662 | 0.81595092  |
| 0.775641026 | 0.664179104 | 0.748466258 | 0.834645669 | 0.74566474  | 0.735294118 | 0.802721088 | 0.81884058  |
| 0.714285714 | 0.719101124 | 0.780701754 | 0.76119403  | 0.839694656 | 0.679012346 | 0.793478261 | 0.638888889 |
| 0.699115044 | 0.714285714 | 0.796992481 | 0.746987952 | 0.838926174 | 0.652631579 | 0.788990826 | 0.692307692 |
| 0.67768595  | 0.724137931 | 0.658914729 | 0.741935484 | 0.776315789 | 0.694444444 | 0.705357143 | 0.718446602 |
| 0.916666667 | 0.932432432 | 0.93877551  | 0.88372093  | 0.982608696 | 0.909090909 | 0.944444444 | 0.913793103 |
| NA          | 0.700854701 | 0.700854701 | 0.659090909 | 0.739583333 | 0.661971831 | 0.669724771 | 0.583333333 |
| 0.700854701 | NA          | 0.740458015 | 0.775280899 | 0.772413793 | 0.683168317 | 0.787234043 | 0.787610619 |
| 0.659090909 | 0.740458015 | NA          | 0.803571429 | 0.58041958  | 0.804878049 | 0.775193798 | 0.615384615 |
| 0.739583333 | 0.775280899 | 0.803571429 | NA          | 0.804878049 | 0.804878049 | 0.725       | 0.722891566 |
| 0.661971831 | 0.772413793 | 0.58041958  | 0.804878049 | NA          | 0.787234043 | 0.787234043 | 0.674242424 |
| 0.669724771 | 0.683168317 | 0.775193798 | 0.725       | 0.787234043 | NA          | 0.674242424 | 0.826086957 |
| 0.62037037  | 0.787610619 | 0.615384615 | 0.722891566 | 0.674242424 | 0.785046729 | NA          | 0.785046729 |
| 0.583333333 | 0.747474747 | 0.726495726 | 0.743243243 | 0.826086957 | 0.685393258 | 0.726315789 | NA          |
| 0.691176471 | 0.751879699 | 0.635714286 | 0.815789474 | 0.612244898 | 0.813432836 | 0.716535433 | 0.818897638 |
| 0.760683761 | 0.779816514 | 0.64957265  | 0.771084337 | 0.609756098 | 0.833333333 | 0.631578947 | 0.63        |
| 0.670103093 | 0.818181818 | 0.709090909 | 0.805555556 | 0.739837398 | 0.777777778 | 0.747252747 | 0.705128205 |
| 0.737179487 | 0.790849673 | 0.551724138 | 0.833333333 | 0.503355705 | 0.844155844 | 0.671532847 | 0.858108108 |
| 0.752293578 | 0.784313725 | 0.808       | 0.807692308 | 0.817518248 | 0.768421053 | 0.79        | 0.786516854 |
| 0.760689565 | 0.813953488 | 0.766990291 | 0.754389565 | 0.793103448 | 0.841463415 | 0.746835443 | 0.837837838 |
| 0.691666667 | 0.739130435 | 0.629032258 | 0.8         | 0.654411765 | 0.840336134 | 0.720720721 | 0.837837838 |
| 0.682242991 | 0.747572816 | 0.777777778 | 0.727272727 | 0.807142857 | 0.729166667 | 0.776699029 | 0.730337079 |
| 0.683760684 | 0.697247706 | 0.744360902 | 0.738636364 | 0.783783784 | 0.663366337 | 0.758928571 | 0.673684211 |
| 0.75862069  | 0.784810127 | 0.836538462 | 0.818181818 | 0.901639344 | 0.746478873 | 0.865853659 | 0.790677419 |
| 0.583333333 | 0.694444444 | 0.692913386 | 0.735632184 | 0.756944444 | 0.618556701 | 0.710280374 | 0.684210526 |
| 0.842105263 | 0.886363636 | 0.891891892 | 0.824561404 | 0.929133858 | 0.802631579 | 0.895348837 | 0.845070423 |
| 0.854368932 | 0.847826087 | 0.88034188  | 0.846153846 | 0.925373134 | 0.807228916 | 0.915789474 | 0.783783784 |
| 0.789473684 | 0.743902439 | 0.846846847 | 0.8         | 0.872       | 0.769230769 | 0.80952381  | 0.757142857 |
| 0.904255319 | 0.8625      | 0.925925926 | 0.823529412 | 0.925       | 0.849315068 | 0.926829268 | 0.897058824 |
| 0.829787234 | 0.833333333 | 0.817559633 | 0.781818182 | 0.903225806 | 0.802631579 | 0.855421687 | 0.776119403 |
| 0.846938776 | 0.83908046  | 0.884955752 | 0.852459016 | 0.92248062  | 0.825       | 0.898876404 | 0.819444444 |
| 0.88372093  | 0.88        | 0.898989899 | 0.847826087 | 0.957264957 | 0.850746269 | 0.934210526 | 0.866666667 |
| 0.866666667 | 0.846153846 | 0.883495146 | 0.843137255 | 0.924369748 | 0.907894737 | 0.884615385 | 0.895522388 |
| 0.790909091 | 0.777777778 | 0.822580645 | 0.815789474 | 0.888111888 | 0.747252747 | 0.865384615 | 0.779069767 |
| 0.779816514 | 0.779       | 0.773109244 | 0.767123288 | 0.830882353 | 0.848484848 | 0.783505155 | 0.793103448 |
| 0.965116279 | 0.930555556 | 0.96969697  | 0.954545455 | 0.99122807  | 0.970588235 | 0.972222222 | 0.966101695 |
| 0.845360825 | 0.823529412 | 0.831775701 | 0.810344828 | 0.887096774 | 0.82278481  | 0.885057471 | 0.8         |
| 0.862068966 | 0.824324324 | 0.912621359 | 0.808510638 | 0.913043478 | 0.873239437 | 0.923076923 | 0.873015873 |
| 0.782608696 | 0.80952381  | 0.80952381  | 0.810344828 | 0.810344828 | 0.851851852 | 0.817073171 | 0.849315068 |
| 0.791366906 | 0.818181818 | 0.649253731 | 0.883928571 | 0.633802817 | 0.920289855 | 0.714285714 | 0.888888889 |
| 0.690909091 | 0.788990826 | 0.634782609 | 0.825581395 | 0.721804511 | 0.853211009 | 0.696969697 | 0.791666667 |
| 0.769911504 | 0.801886792 | 0.774193548 | 0.814814815 | 0.795620438 | 0.811881188 | 0.807692308 | 0.78021978  |
| 0.831775701 | 0.810526316 | 0.859504132 | 0.828571429 | 0.889705882 | 0.860215054 | 0.829787234 | 0.817073171 |
| 0.952941176 | 0.930555556 | 0.948453608 | 0.904761905 | 0.982300885 | 0.920376923 | 0.957746479 | 0.929824561 |
| 0.878787879 | 0.807228916 | 0.892857143 | 0.807017544 | 0.9296875   | 0.820512821 | 0.88372093  | 0.847222222 |
| 0.807692308 | 0.808510638 | 0.858333333 | 0.791044776 | 0.872180451 | 0.793103448 | 0.815217391 | 0.8         |
| 0.875       | 0.870967742 | 0.925619835 | 0.878787879 | 0.963768116 | 0.819277108 | 0.9375      | 0.858974359 |
| 0.774193548 | 0.813559322 | 0.658536585 | 0.864583333 | 0.641221374 | 0.882352941 | 0.719626168 | 0.862385321 |
| 0.934782609 | 0.925       | 0.942857143 | 0.9         | 0.966666667 | 0.887323944 | 0.935897436 | 0.870967742 |
| 0.825174825 | 0.721311475 | 0.801324503 | 0.820754717 | 0.779874214 | 0.768595041 | 0.832061069 | 0.833333333 |
| 0.889908257 | 0.852631579 | 0.844827586 | 0.818181818 | 0.804878049 | 0.827586207 | 0.860215054 | 0.851851852 |
| 0.879120879 | 0.846153846 | 0.861386139 | 0.770833333 | 0.912524237 | 0.863013699 | 0.87012987  | 0.861538462 |
| 0.924731183 | 0.9         | 0.913461538 | 0.836734694 | 0.95        | 0.85915493  | 0.9375      | 0.875       |
| 0.745614035 | 0.775700935 | 0.752       | 0.795180723 | 0.818181818 | 0.796116505 | 0.79245283  | 0.736263736 |
| 0.920353982 | 0.87755102  | 0.92        | 0.838235294 | 0.942857143 | 0.842896629 | 0.983       | 0.853658537 |
| 0.85106383  | 0.829282829 | 0.87962963  | 0.839285714 | 0.928       | 0.797297297 | 0.892857143 | 0.805970149 |
| 0.852631579 | 0.897727273 | 0.815533981 | 0.842105263 | 0.805309735 | 0.941176471 | 0.794871795 | 0.875       |
| 0.831578947 | 0.848837209 | 0.796116505 | 0.827586207 | 0.798245614 | 0.904761905 | 0.829282829 | 0.893333333 |
| 0.86407767  | 0.858696562 | 0.898305085 | 0.825396825 | 0.932835821 | 0.790123457 | 0.891304348 | 0.780821918 |
| 0.898148148 | 0.824175624 | 0.9         | 0.865671642 | 0.933823529 | 0.795180723 | 0.927835052 | 0.8625      |
| 0.894230769 | 0.855555556 | 0.915254237 | 0.892307692 | 0.939849624 | 0.843373494 | 0.936170213 | 0.87012987  |
| 0.82300885  | 0.81372549  | 0.859375    | 0.831168831 | 0.895833333 |             |             |             |

jaccard

| UZ.P107     | UZ.P108     | UZ.P110     | UZ.P111     | UZ.P112     | UZ.P113     | UZ.P114     | UZ.P060     |
|-------------|-------------|-------------|-------------|-------------|-------------|-------------|-------------|
| 0,813333333 | 0,849206349 | 0,837837838 | 0,867816092 | 0,774774775 | 0,824742268 | 0,810606061 | 0,741071429 |
| 0,638461538 | 0,654205607 | 0,623655914 | 0,537313433 | 0,826086957 | 0,77173913  | 0,655172414 | 0,803418803 |
| 0,857142857 | 0,898734177 | 0,873015873 | 0,938931298 | 0,721311475 | 0,782608696 | 0,821428571 | 0,742424242 |
| 0,757352941 | 0,763636364 | 0,775510204 | 0,839506173 | 0,704081633 | 0,75        | 0,786885246 | 0,718446602 |
| 0,637096774 | 0,568421053 | 0,695652174 | 0,607407407 | 0,778846154 | 0,75        | 0,654545455 | 0,8         |
| 0,797202797 | 0,801724138 | 0,794117647 | 0,869822485 | 0,737864078 | 0,786516854 | 0,782258065 | 0,714285714 |
| 0,807142857 | 0,86440678  | 0,757894377 | 0,858895706 | 0,737373737 | 0,816091954 | 0,79338843  | 0,7         |
| 0,846715328 | 0,831775701 | 0,815217391 | 0,872611465 | 0,739130435 | 0,794871795 | 0,838983051 | 0,698924731 |
| 0,660550459 | 0,686046512 | 0,652777778 | 0,69047619  | 0,831460674 | 0,677419355 | 0,641304348 | 0,788888889 |
| 0,858208955 | 0,857142857 | 0,844444444 | 0,911392405 | 0,752808989 | 0,858974359 | 0,842105263 | 0,752688172 |
| 0,704545455 | 0,745454545 | 0,767676768 | 0,774193548 | 0,747572816 | 0,755813953 | 0,739495798 | 0,759259259 |
| 0,8515625   | 0,871287129 | 0,804878049 | 0,893333333 | 0,764705882 | 0,847222222 | 0,833333333 | 0,69047619  |
| 0,819548872 | 0,807692308 | 0,838709677 | 0,871794872 | 0,736263736 | 0,82278481  | 0,817391304 | 0,736842105 |
| 0,713043478 | 0,67816092  | 0,792682927 | 0,753731343 | 0,860215054 | 0,727272727 | 0,690721649 | 0,806451613 |
| 0,866071429 | 0,853658537 | 0,852941176 | 0,918518519 | 0,731343284 | 0,788461538 | 0,872340426 | 0,767123288 |
| 0,868613139 | 0,900909091 | 0,835164835 | 0,932515337 | 0,744444444 | 0,903614458 | 0,854700855 | 0,744680851 |
| 0,841269841 | 0,846938776 | 0,845238095 | 0,907284768 | 0,7         | 0,811594203 | 0,798076923 | 0,73255814  |
| 0,826771654 | 0,84        | 0,837209302 | 0,894736842 | 0,741176471 | 0,866666667 | 0,79245283  | 0,697674419 |
| 0,843283582 | 0,838095238 | 0,822222222 | 0,87012987  | 0,701149425 | 0,786666667 | 0,792792793 | 0,717391304 |
| 0,853658537 | 0,863157895 | 0,820512821 | 0,904109589 | 0,7625      | 0,833333333 | 0,823529412 | 0,683544304 |
| 0,855769231 | 0,868421053 | 0,852459016 | 0,904761905 | 0,796875    | 0,777777778 | 0,847058824 | 0,757575758 |
| 0,684684685 | 0,62195122  | 0,689189189 | 0,68        | 0,818181818 | 0,633333333 | 0,655913978 | 0,815217391 |
| 0,902912621 | 0,888888889 | 0,91254237  | 0,952380952 | 0,85483871  | 0,804878049 | 0,87804878  | 0,848484848 |
| 0,906542056 | 0,864848485 | 0,885245902 | 0,929133858 | 0,770491803 | 0,822222222 | 0,857142857 | 0,873239437 |
| 0,781818182 | 0,78313253  | 0,866666667 | 0,858208955 | 0,704225352 | 0,727272727 | 0,810526316 | 0,756410256 |
| 0,765625    | 0,75        | 0,775280899 | 0,804054054 | 0,711111111 | 0,794871795 | 0,719626168 | 0,712765957 |
| 0,558282209 | 0,696774194 | 0,751677852 | 0,469879518 | 0,808641975 | 0,8125      | 0,636942675 | 0,8         |
| 0,710691824 | 0,813793103 | 0,835820896 | 0,755555556 | 0,746153846 | 0,853658537 | 0,765100671 | 0,717557252 |
| 0,842975207 | 0,836956522 | 0,833333333 | 0,888111888 | 0,775       | 0,830769231 | 0,833333333 | 0,743902439 |
| 0,824817518 | 0,803738318 | 0,833333333 | 0,860759494 | 0,747368421 | 0,7875      | 0,803418803 | 0,734693878 |
| 0,748201439 | 0,794871795 | 0,774509804 | 0,801242236 | 0,718446602 | 0,777777778 | 0,776       | 0,719626168 |
| 0,95        | 0,956521739 | 0,923076923 | 0,975206612 | 0,93220339  | 0,891891952 | 0,923076923 | 0,920634921 |
| 0,691176471 | 0,780683761 | 0,670103093 | 0,737179487 | 0,752293578 | 0,760869565 | 0,691666667 | 0,682242991 |
| 0,751879699 | 0,779816514 | 0,818181818 | 0,790849673 | 0,784313725 | 0,813953488 | 0,739130435 | 0,747572816 |
| 0,635714286 | 0,64957265  | 0,709090909 | 0,551724138 | 0,808       | 0,766990291 | 0,629032258 | 0,777777778 |
| 0,815789474 | 0,771084337 | 0,805555556 | 0,833333333 | 0,807692308 | 0,754385965 | 0,8         | 0,727272727 |
| 0,612244898 | 0,609756098 | 0,739837398 | 0,503355705 | 0,817518248 | 0,793103448 | 0,654411765 | 0,807142857 |
| 0,813432836 | 0,833333333 | 0,777777778 | 0,844155844 | 0,768421053 | 0,841463415 | 0,840336134 | 0,729166667 |
| 0,716535433 | 0,631578947 | 0,747252747 | 0,671532847 | 0,79        | 0,746835443 | 0,720720721 | 0,776990291 |
| 0,818897638 | 0,83        | 0,705128205 | 0,858108108 | 0,786516854 | 0,837837838 | 0,837837838 | 0,730337079 |
| NA          | 0,675       | 0,756521739 | 0,593333333 | 0,780487805 | 0,757281553 | 0,609756098 | 0,76        |
|             | 0,675       | 0,630769231 | 0,630769231 | 0,630769231 | 0,806122449 | 0,606060606 | 0,792079208 |
|             |             | 0,804347826 | 0,744186047 | 0,744186047 | 0,83908046  | 0,698630137 | 0,795454545 |
|             |             | NA          | NA          | NA          | 0,858108108 | 0,795081967 | 0,816326531 |
|             |             |             |             |             | 0,788732394 | 0,788732394 | 0,701149425 |
|             |             |             |             |             | 0,795081967 | 0,755813953 | 0,786666667 |
|             |             |             |             |             | 0,783018868 | NA          | 0,803571429 |
|             |             |             |             |             | 0,701149425 | 0,786666667 | 0,754237288 |
|             |             |             |             |             | 0,727272727 | 0,761904762 | 0,802816901 |
|             |             |             |             |             | 0,84057971  | 0,862745098 | 0,877777778 |
|             |             |             |             |             | 0,774509804 | 0,759036145 | 0,762711864 |
|             |             |             |             |             | 0,932835821 | 0,909090909 | 0,892473118 |
|             |             |             |             |             | 0,831168831 | 0,9375      | 0,952830189 |
|             |             |             |             |             | 0,757142857 | 0,796296296 | 0,875       |
|             |             |             |             |             | 0,863636364 | 0,94        | 0,945054945 |
|             |             |             |             |             | 0,794117647 | 0,867924528 | 0,892473118 |
|             |             |             |             |             | 0,894736842 | 0,907216495 | 0,860759494 |
|             |             |             |             |             | 0,885245902 | 0,930232558 | 0,927710843 |
|             |             |             |             |             | 0,911764706 | 0,844444444 | 0,895348837 |
|             |             |             |             |             | 0,719512195 | 0,878378378 | 0,864848485 |
|             |             |             |             |             | 0,779069767 | 0,779411765 | 0,822429907 |
|             |             |             |             |             | 0,966101695 | 0,945945946 | 0,948717949 |
|             |             |             |             |             | 0,864848485 | 0,892857143 | 0,894736842 |
|             |             |             |             |             | 0,860465116 | 0,891566265 | 0,865671642 |
|             |             |             |             |             | 0,875968992 | 0,734693878 | 0,793103448 |
|             |             |             |             |             | 0,5         | 0,783505155 | 0,647058824 |
|             |             |             |             |             | 0,816326531 | 0,810126582 | 0,754545455 |
|             |             |             |             |             | 0,797202797 | 0,797297297 | 0,831858407 |
|             |             |             |             |             | 0,845238095 | 0,880597015 | 0,897196262 |
|             |             |             |             |             | 0,929824561 | 0,916666667 | 0,948717949 |
|             |             |             |             |             | 0,779411765 | 0,910714286 | 0,893617021 |
|             |             |             |             |             | 0,829268293 | 0,84375     | 0,885714286 |
|             |             |             |             |             | 0,873417722 | 0,953125    | 0,942307692 |
|             |             |             |             |             | 0,851851852 | 0,725       | 0,693693694 |
|             |             |             |             |             | 0,888888889 | 0,956521739 | 0,954022989 |
|             |             |             |             |             | 0,782608696 | 0,854368932 | 0,798507463 |
|             |             |             |             |             | 0,8375      | 0,85483871  | 0,848484848 |
|             |             |             |             |             | 0,825396825 | 0,893617021 | 0,908045977 |
|             |             |             |             |             | 0,857142857 | 0,936170213 | 0,918604651 |
|             |             |             |             |             | 0,81443299  | 0,792207792 | 0,796460177 |
|             |             |             |             |             | 0,853658537 | 0,892307692 | 0,925233645 |
|             |             |             |             |             | 0,823529412 | 0,862745098 | 0,913978495 |
|             |             |             |             |             | 0,85915493  | 0,717391304 | 0,827586207 |
|             |             |             |             |             | 0,878378378 | 0,755102041 | 0,804597701 |
|             |             |             |             |             | 0,858974359 | 0,936507937 | 0,932038835 |
|             |             |             |             |             | 0,833333333 | 0,938461538 | 0,933333333 |
|             |             |             |             |             | 0,898734177 | 0,968253968 | 0,941176471 |
|             |             |             |             |             | 0,793103448 | 0,878378378 | 0,904347826 |
|             |             |             |             |             | 0,792207792 | 0,85483871  | 0,86        |
|             |             |             |             |             | 0,75        | 0,851851852 | 0,850746208 |
|             |             |             |             |             | 0,842696629 | 0,672131148 | 0,734693878 |
|             |             |             |             |             | 0,817073171 | 0,863636364 | 0,82        |
|             |             |             |             |             | 0,747126437 | 0,774647887 | 0,773584906 |
|             |             |             |             |             | 0,942028986 | 0,894736842 | 0,907216495 |
|             |             |             |             |             | 0,861111111 | 0,867924528 | 0,880434783 |
|             |             |             |             |             | 0,857142857 | 0,913043478 | 0,943181818 |
|             |             |             |             |             | 0,8         | 0,851851852 | 0,870967722 |
|             |             |             |             |             | 0,835443038 | 0,90625     | 0,902912621 |

## jaccard

| UZ.P061 | UZ.P063     | UZ.P064     | UZ.P124     | UZ.P127     | UZ.P128      | UZ.P129     | UZ.P130     |
|---------|-------------|-------------|-------------|-------------|--------------|-------------|-------------|
|         | 0,6         | 0,77272723  | 0,596330275 | 0,854166667 | 0,82         | 0,776595745 | 0,880434783 |
|         | 0,785714286 | 0,885416667 | 0,666666667 | 0,898989899 | 0,896226415  | 0,871287129 | 0,9375      |
|         | 0,8         | 0,717948718 | 0,8125      | 0,869565217 | 0,846153846  | 0,787234043 | 0,902439024 |
|         | 0,632075472 | 0,746835443 | 0,615384615 | 0,865168539 | 0,840425532  | 0,767441186 | 0,853658537 |
|         | 0,771186441 | 0,887640449 | 0,736842105 | 0,913978495 | 0,91         | 0,872340426 | 0,931818182 |
|         | 0,62962963  | 0,771084337 | 0,586538462 | 0,857142857 | 0,808510638  | 0,73255814  | 0,885057471 |
|         | 0,638095238 | 0,772151899 | 0,621359223 | 0,862068966 | 0,824175824  | 0,804597701 | 0,891566265 |
|         | 0,574468085 | 0,705882353 | 0,628865979 | 0,875       | 0,819277108  | 0,733333333 | 0,893333333 |
|         | 0,792079208 | 0,882352941 | 0,75257732  | 0,852941176 | 0,938271605  | 0,830895915 | 0,924242424 |
|         | 0,65625     | 0,76119403  | 0,707070707 | 0,851351351 | 0,76         | 0,732394366 | 0,885714286 |
|         | 0,699115044 | 0,78313253  | 0,648148148 | 0,855555556 | 0,855670103  | 0,8         | 0,88372093  |
|         | 0,633333333 | 0,694915254 | 0,673913043 | 0,820895522 | 0,808219178  | 0,727272727 | 0,857142857 |
|         | 0,614583333 | 0,757142857 | 0,625       | 0,858974359 | 0,772151899  | 0,746666667 | 0,845070423 |
|         | 0,796116505 | 0,852941176 | 0,805825243 | 0,918918919 | 0,939759036  | 0,785714286 | 0,926470588 |
|         | 0,696202532 | 0,674418605 | 0,771084337 | 0,907407407 | 0,86440678   | 0,79245283  | 0,893617021 |
|         | 0,621052632 | 0,692307692 | 0,673469388 | 0,84        | 0,782051282  | 0,773333333 | 0,84057971  |
|         | 0,70212766  | 0,711864407 | 0,739583333 | 0,885714286 | 0,837837838  | 0,76119403  | 0,85483871  |
|         | 0,711340206 | 0,704918033 | 0,694736842 | 0,890410959 | 0,844155844  | 0,788732394 | 0,878787879 |
|         | 0,635416667 | 0,768115942 | 0,659793814 | 0,84        | 0,797468354  | 0,722222222 | 0,857142857 |
|         | 0,714285714 | 0,709090909 | 0,752688172 | 0,762711864 | 0,772727273  | 0,7         | 0,8         |
|         | 0,8125      | 0,775       | 0,794871795 | 0,866666667 | 0,865384615  | 0,727272727 | 0,871794872 |
|         | 0,78        | 0,929577465 | 0,765306122 | 0,945945946 | 0,963855422  | 0,878378378 | 0,971014493 |
|         | 0,844155844 | 0,771428571 | 0,857142857 | 0,928571429 | 0,918367347  | 0,837209302 | 0,882352941 |
|         | 0,851851852 | 0,794871795 | 0,805194805 | 0,860465116 | 0,903846154  | 0,85106383  | 0,923076923 |
|         | 0,720930233 | 0,836363636 | 0,747126437 | 0,918032787 | 0,825396825  | 0,754385965 | 0,843137255 |
|         | 0,723809524 | 0,777777778 | 0,6         | 0,831168831 | 0,886363636  | 0,766233766 | 0,847222222 |
|         | 0,758823529 | 0,89261745  | 0,734939759 | 0,922580645 | 0,919753086  | 0,868421053 | 0,933333333 |
|         | 0,725352113 | 0,855932203 | 0,75862069  | 0,904       | 0,901515152  | 0,836065574 | 0,916666667 |
|         | 0,681818182 | 0,875       | 0,662790698 | 0,857142857 | 0,857142857  | 0,758064516 | 0,839285714 |
|         | 0,587628866 | 0,7         | 0,612244898 | 0,8375      | 0,78313253   | 0,710526316 | 0,853333333 |
|         | 0,660714286 | 0,804597701 | 0,62037037  | 0,884210526 | 0,824742268  | 0,819148936 | 0,887640449 |
|         | 0,934210526 | 0,870967742 | 0,933333333 | 0,806451613 | 0,977272727  | 0,864864865 | 0,928571429 |
|         | 0,683760684 | 0,75862069  | 0,583333333 | 0,842105263 | 0,854368932  | 0,789473684 | 0,904255319 |
|         | 0,697247706 | 0,784810127 | 0,694444444 | 0,886363636 | 0,847826087  | 0,743902439 | 0,8625      |
|         | 0,744369092 | 0,836538462 | 0,692913386 | 0,891891892 | 0,8034188    | 0,846846847 | 0,925925926 |
|         | 0,738636364 | 0,818181818 | 0,735632184 | 0,824561404 | 0,846153846  | 0,8         | 0,823529412 |
|         | 0,783783784 | 0,901639344 | 0,756944444 | 0,929133858 | 0,925373134  | 0,872       | 0,903225806 |
|         | 0,663366337 | 0,746478873 | 0,618556701 | 0,802631579 | 0,807228916  | 0,769230769 | 0,802631579 |
|         | 0,758928571 | 0,865853659 | 0,710280374 | 0,895348837 | 0,915789474  | 0,80952381  | 0,926829268 |
|         | 0,673684211 | 0,709677419 | 0,684210526 | 0,845070423 | 0,783783784  | 0,757142857 | 0,897058824 |
|         | 0,782608696 | 0,890909091 | 0,781021898 | 0,931034483 | 0,918032787  | 0,868421053 | 0,926605055 |
|         | 0,783783784 | 0,8875      | 0,759259259 | 0,916666667 | 0,923913043  | 0,843373494 | 0,909090909 |
|         | 0,760416667 | 0,841269841 | 0,688888889 | 0,880597015 | 0,863013699  | 0,805970149 | 0,920634921 |
|         | 0,823899371 | 0,955555556 | 0,776315789 | 0,932835821 | 0,944055944  | 0,919708029 | 0,969696967 |
|         | 0,727272727 | 0,84057971  | 0,774509804 | 0,876712329 | 0,831168831  | 0,757142857 | 0,863636364 |
|         | 0,761904762 | 0,862745098 | 0,759036145 | 0,909090909 | 0,9375       | 0,796296296 | 0,94        |
|         | 0,754237288 | 0,877777778 | 0,762711864 | 0,892473118 | 0,952830189  | 0,875       | 0,945054945 |
|         | 0,702970297 | 0,802816901 | 0,686866867 | 0,898734177 | 0,8125       | 0,756756757 | 0,873239437 |
| NA      | 0,759493671 | 0,759493671 | 0,584158416 | 0,863636364 | 0,813186813  | 0,764705882 | 0,865853659 |
|         | 0,584158416 | 0,74025974  | 0,875       | 0,74025974  | 0,875        | 0,770833333 | 0,880952381 |
|         | 0,863636364 | NA          | 0,848837209 | 0,848837209 | 0,836956522  | 0,804597701 | 0,864197531 |
|         | 0,813186813 | 0,784313725 | 0,836956522 | 0,79245283  | NA           | 0,803921569 | 0,875       |
|         | 0,764705882 | 0,770833333 | 0,804597701 | 0,803921569 | 0,767857143  | NA          | 0,772727273 |
|         | 0,865853659 | 0,880952381 | 0,864197531 | 0,775       | 0,8125       | 0,772727273 | NA          |
|         | 0,780487805 | 0,8         | 0,848837209 | 0,833333333 | 0,745098039  | 0,70212766  | 0,743589744 |
|         | 0,829545455 | 0,8125      | 0,813953488 | 0,795918367 | 0,824561404  | 0,814814815 | 0,869565217 |
|         | 0,868421053 | 0,75        | 0,866666667 | 0,833333333 | 0,780487805  | 0,880952381 | 0,833333333 |
|         | 0,891566265 | 0,820512821 | 0,903614458 | 0,857142857 | 0,901960784  | 0,767441186 | 0,861111111 |
|         | 0,744897959 | 0,716666667 | 0,767676768 | 0,803303030 | 0,720588235  | 0,746268657 | 0,77961017  |
|         | 0,946666667 | 0,77        | 0,850746269 | 0,70212766  | 0,820895522  | 0,774647887 | 0,857142857 |
|         | 0,8         | 0,782608696 | 0,9         | 0,96        | 0,870967742  | 0,976190476 | 0,888888889 |
|         | 0,858974359 | 0,771428571 | 0,797619048 | 0,84        | 0,8754716981 | 0,714285714 | 0,785714286 |
|         | 0,8         | 0,808510638 | 0,886075949 | 0,875       | 0,822222222  | 0,780487805 | 0,774193548 |
|         | 0,863309353 | 0,990909091 | 0,78313253  | 0,884615385 | 0,842105263  | 0,74        | 0,840909091 |
|         | 0,844827586 | 0,926829268 | 0,837037037 | 0,95412844  | 0,974789916  | 0,9375      | 0,980952381 |
|         | 0,759615385 | 0,863013699 | 0,757009346 | 0,815789474 | 0,860465116  | 0,827160494 | 0,893333333 |
|         | 0,87254902  | 0,868852459 | 0,693877551 | 0,75        | 0,726027397  | 0,75        | 0,852941176 |
|         | 0,932432432 | 0,862068966 | 0,945945946 | 0,86        | 0,816666667  | 0,733333333 | 0,814814815 |
|         | 0,78313253  | 0,829787234 | 0,80952381  | 0,733333333 | 0,897407742  | 0,918918919 | 0,833333333 |
|         | 0,8125      | 0,885245902 | 0,79787234  | 0,75        | 0,818181818  | 0,75        | 0,788461538 |
|         | 0,885416667 | 0,890909091 | 0,884210526 | 0,6         | 0,816666667  | 0,740740741 | 0,808510638 |
|         | 0,816666667 | 0,978723404 | 0,825       | 0,934782609 | 0,918367347  | 0,892473118 | 0,941860465 |
|         | 0,913580247 | 0,923076923 | 0,9125      | 0,705882353 | 0,761904762  | 0,833333333 | 0,84375     |
|         | 0,746031746 | 0,88        | 0,819548872 | 0,848484848 | 0,849056604  | 0,797979798 | 0,873684211 |
|         | 0,831578947 | 0,898305085 | 0,87755102  | 0,883333333 | 0,913043478  | 0,838709677 | 0,888888889 |
|         | 0,864197531 | 0,85        | 0,848101266 | 0,857142857 | 0,755555556  | 0,707317073 | 0,828571429 |
|         | 0,860759494 | 0,842105263 | 0,901234568 | 0,756756757 | 0,727272727  | 0,785714286 | 0,78125     |
|         | 0,779816514 | 0,87012987  | 0,718446602 | 0,797297297 | 0,7875       | 0,746666667 | 0,811594203 |
|         | 0,857142857 | 0,9         | 0,867346939 | 0,807017544 | 0,830769231  | 0,822580645 | 0,890909091 |
|         | 0,804878049 | 0,761904762 | 0,831325301 | 0,8         | 0,807692308  | 0,744880851 | 0,694444444 |
|         | 0,86268966  | 0,960784314 | 0,819277108 | 0,921568627 | 0,93220339   | 0,888888889 | 0,909090909 |
|         | 0,877777778 | 0,9         | 0,876404494 | 0,882352941 | 0,951612903  | 0,851851852 | 0,913043478 |
|         | 0,849462366 | 0,849056604 | 0,860215054 | 0,714285714 | 0,775862069  | 0,740740741 | 0,833333333 |
|         | 0,815217391 | 0,788461538 | 0,85106383  | 0,75        | 0,74137931   | 0,75        | 0,773584906 |
|         | 0,882978723 | 0,865384615 | 0,869565217 | 0,729166667 | 0,810344828  | 0,821428571 | 0,8         |
|         | 0,817307692 | 0,833333333 | 0,833333333 | 0,803921569 | 0,765625     | 0,720588235 | 0,8         |
|         | 0,831578947 | 0,916666667 | 0,842105263 | 0,735849057 | 0,828125     | 0,75862069  | 0,846153846 |
|         | 0,875       | 0,871794872 | 0,858974359 | 0,820512821 | 0,85106383   | 0,756097561 | 0,818181818 |
|         | 0,81372549  | 0,943661972 | 0,775510204 | 0,915492958 | 0,9375       | 0,876712329 | 0,955223881 |
|         | 0,802083333 | 0,810344828 | 0,774193548 | 0,775862069 | 0,784615385  | 0,774193548 | 0,79245283  |
|         | 0,754901961 | 0,875       | 0,752475248 | 0,863013699 | 0,833333333  | 0,842105263 | 0,882352941 |
|         | 0,788235294 | 0,787234043 | 0,813953488 | 0,770833333 | 0,759259259  | 0,745098039 | 0,761904762 |
|         | 0,850574713 | 0,8         | 0,848837209 | 0,782608696 | 0,836363636  | 0,729166667 | 0,775       |
|         | 0,846153846 | 0,810810811 | 0,8875      | 0,647058824 | 0,8          | 0,756097561 | 0,78125     |
|         | 0,8         | 0,782608696 | 0,78313253  | 0,765957447 | 0,842105263  | 0,74        | 0,725       |
|         | 0,777777778 | 0,814814815 | 0,840425532 | 0,754716981 | 0,654545455  | 0,85483871  | 0,82        |

## jaccard

| UZ.P131     | UZ.P132     | UZ.P133     | UZ.P115     | UZ.P134     | UZ.P135     | UZ.P136     | UZ.P137     |
|-------------|-------------|-------------|-------------|-------------|-------------|-------------|-------------|
| 0,822916667 | 0,896551724 | 0,891304348 | 0,768518519 | 0,8125      | 0,94047619  | 0,821052632 | 0,887640449 |
| 0,901960784 | 0,956043956 | 0,89010989  | 0,871794872 | 0,742857143 | 0,976474186 | 0,878787879 | 0,923076923 |
| 0,829787234 | 0,774193548 | 0,9         | 0,790322581 | 0,880597015 | 0,931034483 | 0,85106383  | 0,757575758 |
| 0,818181818 | 0,884615385 | 0,879518072 | 0,734693878 | 0,747474747 | 0,961038961 | 0,759036145 | 0,860759494 |
| 0,893617021 | 0,925925926 | 0,865853659 | 0,872727273 | 0,784313725 | 0,987341772 | 0,904255319 | 0,902439024 |
| 0,824175824 | 0,875       | 0,88372093  | 0,690721649 | 0,778846154 | 0,949367089 | 0,835164835 | 0,851851852 |
| 0,827586207 | 0,881578947 | 0,87654321  | 0,755102041 | 0,826923077 | 0,945945946 | 0,852272727 | 0,871794872 |
| 0,8375      | 0,865671642 | 0,861111111 | 0,730337079 | 0,822916667 | 0,954545455 | 0,835443038 | 0,871428571 |
| 0,875       | 0,933333333 | 0,888888889 | 0,877777778 | 0,768292683 | 0,963636364 | 0,873239437 | 0,901639344 |
| 0,842105263 | 0,873015873 | 0,867647059 | 0,729411765 | 0,786516854 | 0,933333333 | 0,757142857 | 0,84375     |
| 0,872340426 | 0,8875      | 0,841463415 | 0,788461538 | 0,752475248 | 0,935064935 | 0,833333333 | 0,864197531 |
| 0,794117647 | 0,839285714 | 0,873015873 | 0,725       | 0,771084337 | 0,945454545 | 0,791044776 | 0,827586207 |
| 0,789473684 | 0,828125    | 0,875       | 0,755555556 | 0,795698925 | 0,9375      | 0,77027027  | 0,818181818 |
| 0,907894737 | 0,952380952 | 0,857142857 | 0,880434783 | 0,880434783 | 0,946428571 | 0,876712329 | 0,904761905 |
| 0,830188679 | 0,846153846 | 0,866666667 | 0,757575758 | 0,811594203 | 0,944444444 | 0,826923077 | 0,829268293 |
| 0,8         | 0,859375    | 0,902777778 | 0,705882353 | 0,854166667 | 0,935483871 | 0,813333333 | 0,830769231 |
| 0,85915493  | 0,877192982 | 0,888888889 | 0,705128205 | 0,852272727 | 0,944444444 | 0,805970149 | 0,803571429 |
| 0,816901408 | 0,844827586 | 0,876923077 | 0,761904762 | 0,844444444 | 0,947368421 | 0,847222222 | 0,81359322  |
| 0,75        | 0,859375    | 0,871428571 | 0,791208791 | 0,764044944 | 0,935483871 | 0,797297297 | 0,830769231 |
| 0,754098361 | 0,82        | 0,773584906 | 0,666666667 | 0,784810127 | 0,893617021 | 0,728813559 | 0,807692308 |
| 0,772727273 | 0,766666667 | 0,771428571 | 0,786885246 | 0,825396825 | 0,888888889 | 0,795454545 | 0,787878788 |
| 0,905405405 | 0,984126984 | 0,923076923 | 0,902173913 | 0,78313253  | 0,982142857 | 0,888888889 | 0,936507937 |
| 0,88372093  | 0,851851852 | 0,84375     | 0,866666667 | 0,885245902 | 0,909090909 | 0,880952381 | 0,785714286 |
| 0,869565217 | 0,90625     | 0,891891892 | 0,875       | 0,875       | 0,923076923 | 0,866666667 | 0,882352941 |
| 0,921875    | 0,869565217 | 0,84        | 0,813333333 | 0,828947368 | 0,928571429 | 0,807017544 | 0,804347826 |
| 0,8375      | 0,882352941 | 0,891891892 | 0,784946237 | 0,77173913  | 0,954545455 | 0,820512821 | 0,85072464  |
| 0,91025641  | 0,944827586 | 0,895833333 | 0,862275449 | 0,8125      | 0,971830986 | 0,880794702 | 0,931506849 |
| 0,870967742 | 0,921052632 | 0,897435897 | 0,796992481 | 0,84057971  | 0,964285714 | 0,905511811 | 0,913793103 |
| 0,770491803 | 0,884615385 | 0,857142857 | 0,766233766 | 0,8125      | 0,959183673 | 0,857142857 | 0,87037037  |
| 0,8         | 0,871428571 | 0,866666667 | 0,725274725 | 0,791666667 | 0,965621739 | 0,797468354 | 0,845070423 |
| 0,864583333 | 0,87804878  | 0,898876404 | 0,735294118 | 0,735294118 | 0,963414634 | 0,8         | 0,895348837 |
| 0,857142857 | 0,904761905 | 0,791666667 | 0,909090909 | 0,928571429 | 0,857142857 | 0,885714286 | 0,869565217 |
| 0,846938776 | 0,88372093  | 0,866666667 | 0,790909091 | 0,779816514 | 0,965116279 | 0,845360825 | 0,862068966 |
| 0,83908046  | 0,88        | 0,846153846 | 0,777777778 | 0,79        | 0,930555556 | 0,823529412 | 0,824324324 |
| 0,884955752 | 0,898989899 | 0,883495146 | 0,822580645 | 0,773109244 | 0,96969697  | 0,831775701 | 0,812621359 |
| 0,852459016 | 0,847826087 | 0,843137255 | 0,815789474 | 0,767123288 | 0,954545455 | 0,810344828 | 0,808510638 |
| 0,92248062  | 0,957264957 | 0,924369748 | 0,888111888 | 0,830862353 | 0,99122807  | 0,887096774 | 0,913043478 |
| 0,825       | 0,850746269 | 0,907894737 | 0,747252747 | 0,848484848 | 0,970588235 | 0,82278481  | 0,873239437 |
| 0,898876404 | 0,934210526 | 0,884615385 | 0,865384615 | 0,783051055 | 0,972222222 | 0,885054741 | 0,923076923 |
| 0,819444444 | 0,866666667 | 0,895522388 | 0,779069767 | 0,793103448 | 0,966101695 | 0,8         | 0,873015873 |
| 0,923728814 | 0,921568627 | 0,895238095 | 0,8515625   | 0,795081967 | 0,97        | 0,875       | 0,913461538 |
| 0,931818182 | 0,945205479 | 0,878378378 | 0,882352941 | 0,774193548 | 0,970588235 | 0,892857143 | 0,888888889 |
| 0,852941176 | 0,948275862 | 0,919354839 | 0,860465116 | 0,775       | 0,981132075 | 0,850746269 | 0,915254237 |
| 0,918518519 | 0,959677419 | 0,928571429 | 0,929032258 | 0,814285714 | 0,991735537 | 0,901515152 | 0,952380952 |
| 0,819444444 | 0,885245902 | 0,911764706 | 0,719512195 | 0,779096976 | 0,966101695 | 0,864864865 | 0,836065574 |
| 0,894736842 | 0,930232558 | 0,844444444 | 0,878378378 | 0,779411765 | 0,945945946 | 0,892857143 | 0,860465116 |
| 0,907216495 | 0,927710843 | 0,895348837 | 0,864864865 | 0,822429907 | 0,948717949 | 0,894736842 | 0,891566265 |
| 0,860759494 | 0,876923077 | 0,871428571 | 0,720930233 | 0,777777778 | 0,96875     | 0,844155844 | 0,865671642 |
| 0,829545455 | 0,868421053 | 0,891566265 | 0,744897959 | 0,77        | 0,946666667 | 0,8         | 0,858974359 |
| 0,8125      | 0,75        | 0,820512821 | 0,716666667 | 0,850746269 | 0,9         | 0,782608696 | 0,771428571 |
| 0,813953488 | 0,866666667 | 0,903614458 | 0,767676768 | 0,70212766  | 0,96        | 0,797619048 | 0,886075949 |
| 0,795918367 | 0,833333333 | 0,857142857 | 0,803030303 | 0,820895522 | 0,870967742 | 0,84        | 0,875       |
| 0,824561404 | 0,780487805 | 0,901960784 | 0,720588235 | 0,774647887 | 0,976190476 | 0,754716981 | 0,822222222 |
| 0,814814815 | 0,880952381 | 0,76744186  | 0,746268657 | 0,782608696 | 0,888888889 | 0,714285714 | 0,780487805 |
| 0,869565217 | 0,833333333 | 0,861111111 | 0,779661017 | 0,857142857 | 0,88        | 0,785714286 | 0,774193548 |
| 0,795918367 | 0,8         | 0,88372093  | 0,746031746 | 0,746031746 | 0,939393939 | 0,816326531 | 0,815789474 |
| 0,783783784 | 0,783783784 | 0,840909091 | 0,757575758 | 0,811594203 | 0,944444444 | 0,803921569 | 0,8         |
| 0,840909091 | 0,866666667 | 0,866666667 | 0,796296296 | 0,859649123 | 0,95        | 0,742857143 | 0,652173913 |
| 0,757575758 | 0,98296296  | 0,836065574 | 0,836065574 | 0,836065574 | 0,772727273 | 0,837209302 | 0,806451613 |
| 0,811594203 | 0,859649123 | 0,836065574 | 0,756097561 | 0,756097561 | 0,905660377 | 0,753846154 | 0,807017544 |
| 0,944444444 | 0,95        | 0,772727273 | 0,905660377 | 0,925925926 | 0,925925926 | 0,753846154 | 0,874576227 |
| 0,803921569 | 0,742857143 | 0,837209302 | 0,753846154 | 0,753846154 | 0,911764706 | 0,911764706 | 0,857142857 |
| 0,8         | 0,652173913 | 0,806451613 | 0,807017544 | 0,847457627 | 0,857142857 | 0,729729723 | 0,794871795 |
| 0,87037037  | 0,842105263 | 0,80952381  | 0,791044776 | 0,791044776 | 0,911764706 | 0,775510204 | 0,794871795 |
| 0,955357143 | 0,979591837 | 0,94        | 0,962121212 | 0,829059829 | 1           | 0,935779817 | 0,97        |
| 0,879518072 | 0,914285714 | 0,891891892 | 0,835051546 | 0,715909091 | 0,954545455 | 0,820512821 | 0,902777778 |
| 0,857142857 | 0,85483871  | 0,884057971 | 0,772727273 | 0,65        | 0,915254237 | 0,774647887 | 0,861538462 |
| 0,911764706 | 0,924528302 | 0,894736842 | 0,763157895 | 0,712328767 | 0,936170213 | 0,841269841 | 0,909090909 |
| 0,882352941 | 0,764705882 | 0,875       | 0,905660377 | 0,905660377 | 0,833333333 | 0,84375     | 0,857142857 |
| 0,775510204 | 0,805555556 | 0,804878049 | 0,769230769 | 0,75        | 0,875       | 0,744680851 | 0,820512821 |
| 0,859375    | 0,901960784 | 0,872727273 | 0,82278481  | 0,76        | 0,934782609 | 0,819672131 | 0,886792453 |
| 0,821428571 | 0,886363636 | 0,921568627 | 0,837837838 | 0,853333333 | 0,923076923 | 0,796296296 | 0,893617021 |
| 0,913978495 | 0,95        | 0,941176471 | 0,9         | 0,777777778 | 0,968642105 | 0,850574713 | 0,93902439  |
| 0,880952381 | 0,928571429 | 0,971428571 | 0,824561404 | 0,901639344 | 0,954545455 | 0,85        | 0,935483871 |
| 0,885714286 | 0,913043478 | 0,895833333 | 0,798245614 | 0,787610619 | 0,9505618   | 0,828282828 | 0,868131868 |
| 0,833333333 | 0,895833333 | 0,907407407 | 0,888888889 | 0,846153846 | 0,930232558 | 0,830508475 | 0,857142857 |
| 0,813953488 | 0,785714286 | 0,857142857 | 0,796610169 | 0,775862069 | 0,92        | 0,684210526 | 0,766666667 |
| 0,860465116 | 0,769230769 | 0,882352941 | 0,767857143 | 0,85        | 0,863636364 | 0,8         | 0,75        |
| 0,789473684 | 0,863636364 | 0,875       | 0,697674419 | 0,65060241  | 0,9375      | 0,736111111 | 0,852941176 |
| 0,85483871  | 0,875       | 0,965517241 | 0,786666667 | 0,833333333 | 1           | 0,833333333 | 0,903846154 |
| 0,733333333 | 0,787878788 | 0,722222222 | 0,737704918 | 0,777777778 | 0,9         | 0,782608696 | 0,837837838 |
| 0,905660377 | 0,948717949 | 0,906976744 | 0,901408451 | 0,721311475 | 0,96969697  | 0,86        | 0,9         |
| 0,909090909 | 0,951219512 | 0,860465116 | 0,888888889 | 0,823529412 | 0,875       | 0,907407407 | 0,87804878  |
| 0,8         | 0,860465116 | 0,921568627 | 0,788732394 | 0,853333333 | 0,975609756 | 0,725490196 | 0,869565217 |
| 0,807017544 | 0,756097561 | 0,903846154 | 0,705882353 | 0,826666667 | 0,9         | 0,711538462 | 0,772727273 |
| 0,896551724 | 0,909697674 | 0,960784314 | 0,746268657 | 0,864864865 | 0,947368421 | 0,811320755 | 0,837209302 |
| 0,845070423 | 0,818181818 | 0,940298507 | 0,740740741 | 0,827586207 | 0,98245614  | 0,826086957 | 0,847457627 |
| 0,870967742 | 0,872340426 | 0,907407407 | 0,783783784 | 0,732394366 | 0,954545455 | 0,789473684 | 0,88        |
| 0,833333333 | 0,72        | 0,733333333 | 0,830508475 | 0,810344828 | 0,863636364 | 0,769230769 | 0,75        |
| 0,918918919 | 0,967213115 | 0,921875    | 0,913043478 | 0,765432099 | 0,981818182 | 0,887323944 | 0,918032787 |
| 0,806451613 | 0,8125      | 0,894736842 | 0,746666667 | 0,763157895 | 0,913043478 | 0,719298246 | 0,8         |
| 0,837837838 | 0,830508475 | 0,863636364 | 0,76744186  | 0,738095238 | 0,949152542 | 0,802816901 | 0,838709677 |
| 0,784313725 | 0,676470588 | 0,813953488 | 0,738461538 | 0,811594203 | 0,848484848 | 0,70212766  | 0,702702703 |
| 0,82        | 0,833333333 | 0,736842105 | 0,746031746 | 0,803030303 | 0,870967742 | 0,791666667 | 0,783783784 |
| 0,775       | 0,857142857 | 0,914285714 | 0,868852459 | 0,868852459 | 0,958333333 | 0,829268293 | 0,870967742 |
| 0,803921569 | 0,84        |             |             |             |             |             |             |

jaccard

| UZ.P138     | UZ.P139     | UZ.P140     | UZ.P141     | UZ.P142     | UZ.P143     | UZ.P116     | UZ.P144     |
|-------------|-------------|-------------|-------------|-------------|-------------|-------------|-------------|
| 0,857142857 | 0,909090909 | 0,848       | 0,801724138 | 0,80952381  | 0,927710843 | 0,752808989 | 0,819047619 |
| 0,855670103 | 0,608333333 | 0,598039216 | 0,698113208 | 0,862385321 | 0,976744186 | 0,910891089 | 0,861111111 |
| 0,875       | 0,952380952 | 0,897435897 | 0,890410959 | 0,883333333 | 0,851851852 | 0,847826087 | 0,9         |
| 0,788235294 | 0,864285714 | 0,76146789  | 0,737864078 | 0,851485149 | 0,933333333 | 0,813953488 | 0,789473684 |
| 0,773809524 | 0,663865546 | 0,62244898  | 0,785046729 | 0,873786408 | 0,961038961 | 0,926315789 | 0,85        |
| 0,781609195 | 0,890410959 | 0,810344828 | 0,733333333 | 0,785714286 | 0,949367089 | 0,779069767 | 0,854368932 |
| 0,865168539 | 0,902097902 | 0,863247863 | 0,803738318 | 0,882352941 | 0,96        | 0,823529412 | 0,892156863 |
| 0,773333333 | 0,935251799 | 0,862385321 | 0,81        | 0,846153846 | 0,938461538 | 0,802631579 | 0,804597701 |
| 0,769230769 | 0,67961165  | 0,666666667 | 0,797752809 | 0,865853659 | 0,924528302 | 0,887323944 | 0,835443038 |
| 0,87012987  | 0,940740741 | 0,855769231 | 0,774193548 | 0,80952381  | 0,915254237 | 0,771428571 | 0,835294118 |
| 0,77969767  | 0,807407407 | 0,765765766 | 0,788990826 | 0,82        | 0,948717949 | 0,844444444 | 0,83        |
| 0,808823529 | 0,937984496 | 0,87        | 0,813186813 | 0,810126582 | 0,905660377 | 0,787878788 | 0,8375      |
| 0,818181818 | 0,911111111 | 0,871559633 | 0,795918367 | 0,831460674 | 0,920634921 | 0,783783784 | 0,829545455 |
| 0,738461538 | 0,778761062 | 0,836734694 | 0,864583333 | 0,895348837 | 0,946428571 | 0,934210526 | 0,894117647 |
| 0,849056604 | 0,955357143 | 0,892857143 | 0,842105263 | 0,878787879 | 0,882352941 | 0,823529412 | 0,841269941 |
| 0,858974359 | 0,978873239 | 0,9         | 0,828282828 | 0,853932584 | 0,918032787 | 0,777777778 | 0,852272727 |
| 0,823529412 | 0,929133858 | 0,891089109 | 0,849462366 | 0,851851852 | 0,924528302 | 0,820895522 | 0,835443038 |
| 0,797101449 | 0,946969697 | 0,883495146 | 0,865979381 | 0,870588235 | 0,888888889 | 0,876712329 | 0,895348837 |
| 0,797297297 | 0,901515152 | 0,847619048 | 0,791666667 | 0,866666667 | 0,918032787 | 0,794520548 | 0,852272727 |
| 0,790322581 | 0,92629508  | 0,824175824 | 0,8         | 0,826666667 | 0,869565217 | 0,745762712 | 0,791666667 |
| 0,76744186  | 0,920792079 | 0,851351351 | 0,84057971  | 0,862068966 | 0,846153846 | 0,790697674 | 0,859649123 |
| 0,769230769 | 0,64        | 0,682352941 | 0,797752809 | 0,892857143 | 0,982142857 | 0,960526316 | 0,891566626 |
| 0,880952381 | 0,948979592 | 0,946666667 | 0,927536232 | 0,928571429 | 0,909090909 | 0,930232558 | 0,964912281 |
| 0,866666667 | 0,940594059 | 0,878378378 | 0,916666667 | 0,915254237 | 0,88        | 0,863636364 | 0,894736842 |
| 0,716981132 | 0,882882883 | 0,863636364 | 0,8125      | 0,875       | 0,928571429 | 0,844827586 | 0,888888889 |
| 0,789473684 | 0,84375     | 0,796116505 | 0,833333333 | 0,846153846 | 0,938461538 | 0,8625      | 0,844444444 |
| 0,850340136 | 0,58490566  | 0,694805195 | 0,804878049 | 0,883435583 | 0,971830986 | 0,901960784 | 0,86875     |
| 0,879032258 | 0,765822785 | 0,86        | 0,839160839 | 0,857142857 | 0,954594955 | 0,87804878  | 0,881481481 |
| 0,825396825 | 0,916666667 | 0,847826087 | 0,865168539 | 0,824324324 | 0,9375      | 0,822580645 | 0,837837838 |
| 0,797468354 | 0,929078014 | 0,855858586 | 0,767676768 | 0,826086957 | 0,92573134  | 0,794871795 | 0,770114943 |
| 0,838709677 | 0,845070423 | 0,761061947 | 0,794642857 | 0,836538462 | 0,950617284 | 0,824175824 | 0,846153846 |
| 0,945945946 | 0,989361702 | 0,971014493 | 0,952380952 | 0,96        | 0,857142857 | 0,848484848 | 0,9375      |
| 0,782608696 | 0,791366906 | 0,690909091 | 0,769911504 | 0,831775701 | 0,952941176 | 0,878787879 | 0,807692308 |
| 0,80952381  | 0,818181818 | 0,788990826 | 0,801886792 | 0,810526316 | 0,930555556 | 0,807228916 | 0,808510638 |
| 0,80952381  | 0,649253731 | 0,634782609 | 0,774193548 | 0,859604132 | 0,948453608 | 0,892857143 | 0,858333333 |
| 0,810344828 | 0,883928571 | 0,825581395 | 0,814814815 | 0,828571429 | 0,904761905 | 0,807017544 | 0,791044776 |
| 0,810344828 | 0,633802817 | 0,721804511 | 0,795620438 | 0,889705882 | 0,982300885 | 0,9296875   | 0,872180451 |
| 0,851851852 | 0,920289855 | 0,853211009 | 0,811881188 | 0,860215054 | 0,923076923 | 0,820512821 | 0,793103448 |
| 0,817073171 | 0,714285714 | 0,696969697 | 0,807692308 | 0,829787234 | 0,957746479 | 0,88372093  | 0,815217391 |
| 0,849315068 | 0,888888889 | 0,791666667 | 0,78021978  | 0,817073171 | 0,929824561 | 0,847222222 | 0,8         |
| 0,822429907 | 0,610687023 | 0,694214876 | 0,840909091 | 0,879032258 | 0,97        | 0,913043478 | 0,859504132 |
| 0,792207792 | 0,657657658 | 0,711340206 | 0,787878788 | 0,860215054 | 0,970588235 | 0,917647059 | 0,833333333 |
| 0,777777778 | 0,757009346 | 0,717647059 | 0,731707317 | 0,902439024 | 0,961538462 | 0,914285714 | 0,828947368 |
| 0,875968992 | 0,5         | 0,698529412 | 0,797202797 | 0,917808219 | 0,991735537 | 0,933333333 | 0,862318841 |
| 0,816901408 | 0,88        | 0,816326531 | 0,793478261 | 0,845238095 | 0,929824561 | 0,779411765 | 0,829268293 |
| 0,734693878 | 0,783505155 | 0,810126582 | 0,797297297 | 0,880597015 | 0,916666667 | 0,910714286 | 0,84375     |
| 0,793103448 | 0,647058824 | 0,754545455 | 0,831858407 | 0,897196262 | 0,948717949 | 0,893617021 | 0,885714286 |
| 0,813333333 | 0,849206349 | 0,847619048 | 0,778947368 | 0,840909091 | 0,935483871 | 0,842105263 | 0,839080046 |
| 0,8         | 0,863309353 | 0,844827586 | 0,759615385 | 0,87254902  | 0,932432432 | 0,78313253  | 0,8125      |
| 0,808510638 | 0,990909091 | 0,926829268 | 0,863013699 | 0,868852459 | 0,862068966 | 0,829787234 | 0,885245902 |
| 0,78313253  | 0,837037037 | 0,757009346 | 0,693877551 | 0,86        | 0,945945946 | 0,80952381  | 0,79787725  |
| 0,884615385 | 0,95412844  | 0,815789474 | 0,75        | 0,816666667 | 0,870967742 | 0,733333333 | 0,839080046 |
| 0,842105263 | 0,974789916 | 0,860465116 | 0,726027397 | 0,765625    | 0,897435897 | 0,796296296 | 0,818181818 |
| 0,74        | 0,9375      | 0,827160494 | 0,75        | 0,733333333 | 0,918918919 | 0,76        | 0,75        |
| 0,840909091 | 0,980952381 | 0,893333333 | 0,852941176 | 0,814814815 | 0,833333333 | 0,780487805 | 0,788461538 |
| 0,791666667 | 0,95412844  | 0,831168831 | 0,802819310 | 0,796610169 | 0,870967742 | 0,760869565 | 0,793103448 |
| 0,87037037  | 0,955357143 | 0,879518072 | 0,857142857 | 0,911764706 | 0,882352941 | 0,775510204 | 0,859375    |
| 0,842105263 | 0,979591837 | 0,914285714 | 0,85483871  | 0,924528302 | 0,764705882 | 0,805555556 | 0,901960784 |
| 0,80952381  | 0,94        | 0,891891892 | 0,884057971 | 0,894736842 | 0,865       | 0,804878049 | 0,872727273 |
| 0,791044776 | 0,962121212 | 0,835051546 | 0,772727273 | 0,763157895 | 0,905660377 | 0,769230769 | 0,82278481  |
| 0,791044776 | 0,829059829 | 0,715909091 | 0,65        | 0,712328767 | 0,905660377 | 0,75        | 0,76        |
| 0,911764706 | 1           | 0,954545455 | 0,915254237 | 0,936170213 | 0,833333333 | 0,875       | 0,934782609 |
| 0,775510204 | 0,935779817 | 0,820512821 | 0,774647887 | 0,841269841 | 0,84375     | 0,744680851 | 0,819672131 |
| 0,794871795 | 0,97        | 0,902777778 | 0,861538462 | 0,909090909 | 0,857142857 | 0,820512821 | 0,866792453 |
|             | 0,862745098 | 0,713043478 | 0,818181818 | 0,808219178 | 0,911764706 | 0,907407407 | 0,819672131 |
| 0,862745098 | NA          | 0,713043478 | NA          | 0,818181818 | 0,925       | 0,963963964 | 0,933333333 |
| 0,789473684 | 0,713043478 | NA          | 0,720430108 | 0,734939759 | 0,734939759 | 0,848101266 | 0,746987952 |
| 0,808219178 | 0,818181818 | 0,720430108 | NA          | 0,717948718 | 0,717948718 | 0,915254237 | 0,697368421 |
| 0,876923077 | 0,925       | 0,938461538 | 0,734939759 | 0,717948718 | NA          | 0,8         | 0,712121212 |
| 0,911764706 | 1           | 0,848101266 | 0,915254237 | 0,735294118 | 0,913043478 | 0,875       | 0,911111111 |
| 0,907407407 | 0,963963964 | 0,848101266 | 0,735294118 | 0,8         | 0,8         | 0,875       | 0,732142857 |
| 0,819672131 | 0,933333333 | 0,746987952 | 0,697368421 | 0,712121212 | 0,911111111 | 0,732142857 | NA          |
| 0,951612903 | 0,991666667 | 0,831325301 | 0,756756757 | 0,7         | 0,923076923 | 0,745098039 | 0,716666667 |
| 0,80952381  | 0,485436893 | 0,68        | 0,79047619  | 0,881188119 | 0,959459459 | 0,935483871 | 0,868666667 |
| 0,954545455 | 0,98        | 0,885714286 | 0,859375    | 0,82        | 0,904761905 | 0,815789474 | 0,84        |
| 0,862745098 | 0,813793103 | 0,816       | 0,818181818 | 0,805555556 | 0,931034483 | 0,802083333 | 0,79245283  |
| 0,810344828 | 0,831775701 | 0,902173913 | 0,88372093  | 0,906666667 | 0,904761905 | 0,885245902 | 0,875       |
| 0,80952381  | 0,918367347 | 0,845070423 | 0,796875    | 0,854545455 | 0,92        | 0,833333333 | 0,851851852 |
| 0,88372093  | 0,990291262 | 0,888888889 | 0,828125    | 0,849056604 | 0,80952381  | 0,763157895 | 0,867924528 |
| 0,753424658 | 0,8515625   | 0,663043478 | 0,659090909 | 0,716049383 | 0,920634921 | 0,767123288 | 0,7125      |
| 0,923076923 | 0,967213115 | 0,853932584 | 0,772151899 | 0,723076923 | 0,906976744 | 0,830508475 | 0,776119403 |
| 0,833333333 | 0,962962963 | 0,871794872 | 0,830985915 | 0,810344828 | 0,777777778 | 0,720930233 | 0,785714286 |
| 0,836734694 | 0,758241758 | 0,746478873 | 0,764705882 | 0,870967742 | 0,9375      | 0,943396226 | 0,887096774 |
| 0,744680851 | 0,81443299  | 0,786666667 | 0,853333333 | 0,892307692 | 0,909090909 | 0,905660377 | 0,836065574 |
| 0,879310345 | 0,983193277 | 0,817073171 | 0,805194805 | 0,721311475 | 0,923076923 | 0,769230769 | 0,716666667 |
| 0,86440678  | 0,983471074 | 0,792682927 | 0,72972973  | 0,823529412 | 0,9         | 0,705882353 | 0,784615385 |
| 0,913793103 | 0,991525424 | 0,827160494 | 0,763783784 | 0,711864407 | 0,947368421 | 0,807692308 | 0,728813559 |
| 0,85915493  | 0,946153846 | 0,810526316 | 0,698795181 | 0,72972973  | 0,925925926 | 0,787878788 | 0,76        |
| 0,904761905 | 0,883928571 | 0,721518987 | 0,608696562 | 0           |             |             |             |



jaccard

Table with 9 columns: UZ.P145, UZ.P146, UZ.P147, UZ.P148, UZ.P149, UZ.P150, UZ.P151, UZ.P152. The table contains numerical data for each column across multiple rows. Some rows have 'NA' in the UZ.P145 column.

jaccard

Table with 10 columns (UZ.P153 to UZ.P159) and multiple rows of numerical data. Includes labels 'NA' in the first column for several rows.



jaccard

| UZ.P122        | UZ.P123     |
|----------------|-------------|
| 0,833333333    | 0,811881188 |
| 0,878787879    | 0,877358491 |
| 0,826086957    | 0,851851852 |
| 0,802325581    | 0,84375     |
| 0,868131868    | 0,878787879 |
| 0,795454545    | 0,871287129 |
| 0,825581395    | 0,852631579 |
| 0,820512821    | 0,823529412 |
| 0,805970149    | 0,9         |
| 0,808219178    | 0,797468354 |
| 0,833333333    | 0,87        |
| 0,826086957    | 0,813333333 |
| 0,802631579    | 0,792682927 |
| 0,861111111    | 0,941176471 |
| 0,755102041    | 0,810344828 |
| 0,813333333    | 0,817073171 |
| 0,823529412    | 0,857142857 |
| 0,830985915    | 0,87654321  |
| 0,763888889    | 0,831325301 |
| 0,728813559    | 0,814285714 |
| 0,795454545    | 0,890909091 |
| 0,857142857    | 0,913580247 |
| 0,853658537    | 0,921568627 |
| 0,866666667    | 0,927272727 |
| 0,827586207    | 0,882352941 |
| 0,805194805    | 0,876404494 |
| 0,865771812    | 0,89375     |
| 0,888          | 0,877862595 |
| 0,861538462    | 0,861111111 |
| 0,827160494    | 0,816091954 |
| 0,826086957    | 0,778947368 |
| 0,916666667    | 0,955555556 |
| 0,845368025    | 0,878504673 |
| 0,823529412    | 0,863157895 |
| 0,853211009    | 0,863247863 |
| 0,789473684    | 0,867647059 |
| 0,887096774    | 0,885496183 |
| 0,82278481     | 0,811764706 |
| 0,858823529    | 0,870967742 |
| 0,8            | 0,820512821 |
| 0,904347826    | 0,901639344 |
| 0,879518072    | 0,902173913 |
| 0,833333333    | 0,896103896 |
| 0,925925926    | 0,922535211 |
| 0,8            | 0,835443038 |
| 0,851851852    | 0,90625     |
| 0,870967742    | 0,902912621 |
| 0,844155844    | 0,858823529 |
| 0,8            | 0,777777778 |
| 0,782608696    | 0,814814815 |
| 0,78313253     | 0,840425532 |
| 0,765957447    | 0,754716981 |
| 0,842105263    | 0,654545455 |
| 0,74           | 0,85483871  |
| 0,725          | 0,82        |
| 0,739130435    | 0,754716981 |
| 0,803921569    | 0,85        |
| 0,842105263    | 0,761904762 |
| 0,80952381     | 0,925925926 |
| 0,772727273    | 0,728571429 |
| 0,734375       | 0,710144928 |
| 0,806451613    | 0,953488372 |
| 0,75           | 0,785714286 |
| 0,763157895    | 0,829787234 |
| 0,775510204    | 0,866666667 |
| 0,935779817    | 0,949152542 |
| 0,820512821    | 0,876404494 |
| 0,774647887    | 0,75        |
| 0,841269841    | 0,826086957 |
| 0,84375        | 0,902439024 |
| 0,688888889    | 0,759259259 |
| 0,819672131    | 0,787878788 |
| 0,839285714    | 0,822580645 |
| 0,901098901    | 0,909090909 |
| 0,789473684    | 0,8         |
| 0,84           | 0,862385321 |
| 0,904761905    | 0,867647059 |
| 0,80952381     | 0,884615385 |
| 0,736842105    | 0,755555556 |
| 0,77027027     | 0,7625      |
| 0,888888889    | 0,835820896 |
| 0,727272727    | 0,79245283  |
| 0,836734694    | 0,859649123 |
| 0,843137255    | 0,901639344 |
| 0,796296296    | 0,803278689 |
| 0,759259259    | 0,75        |
| 0,854545455    | 0,775862069 |
| 0,826086957    | 0,728571429 |
| 0,789473684    | 0,777777778 |
| 0,769230769    | 0,857142857 |
| 0,871428571    | 0,884615385 |
| 0,822580645    | 0,808823529 |
| 0,881578947    | 0,8375      |
| 0,729166667    | 0,722222222 |
| 0,681818182    | 0,821428571 |
| 0,8            | 0,808510638 |
| NA             | 0,716981132 |
| 0,716981132 NA |             |

## Supplementary File 5

| alpha_diversities-1 |        |                   |                   |
|---------------------|--------|-------------------|-------------------|
| Sample code         | Status | Shannon diversity | Simpson diversity |
| UZ.P066             | Ctrl   | 3,040128549       | 0,88989411        |
| UZ.P067             | Ctrl   | 2,936797879       | 0,866697692       |
| UZ.P068             | IPA    | 0,443405778       | 0,168096743       |
| UZ.P069             | IPA    | 1,221306011       | 0,449344568       |
| UZ.P070             | IPA    | 2,537189327       | 0,867575066       |
| UZ.P071             | IPA    | 3,063380981       | 0,8974037         |
| UZ.P072             | IPA    | 1,257510951       | 0,436049813       |
| UZ.P073             | IPA    | 2,993308845       | 0,911929895       |
| UZ.P074             | IPA    | 2,08377           | 0,714794331       |
| UZ.P056             | IPA    | 3,100703343       | 0,922230217       |
| UZ.P075             | IPA    | 3,061881809       | 0,906431066       |
| UZ.P076             | IPA    | 2,322348401       | 0,844071018       |
| UZ.P077             | IPA    | 2,322699716       | 0,817056843       |
| UZ.P079             | IPA    | 0,491583674       | 0,156892725       |
| UZ.P080             | IPA    | 1,880596          | 0,797702528       |
| UZ.P081             | IPA    | 2,592708136       | 0,842672675       |
| UZ.P083             | IPA    | 1,250563779       | 0,59232225        |
| UZ.P084             | IPA    | 1,584026097       | 0,55441434        |
| UZ.P085             | IPA    | 3,107229386       | 0,882676825       |
| UZ.P057             | IPA    | 0,97275414        | 0,436626656       |
| UZ.P086             | IPA    | 1,471627498       | 0,694007507       |
| UZ.P087             | IPA    | 0,897568008       | 0,296347497       |
| UZ.P089             | IPA    | 1,903764972       | 0,777368322       |
| UZ.P091             | IPA    | 2,856775712       | 0,926328284       |
| UZ.P092             | Ctrl   | 2,831116944       | 0,899828544       |
| UZ.P093             | Ctrl   | 3,053066756       | 0,899365855       |
| UZ.P094             | Ctrl   | 3,490389615       | 0,941353464       |
| UZ.P095             | Ctrl   | 3,416688054       | 0,92462455        |
| UZ.P096             | Ctrl   | 2,471833297       | 0,860321121       |
| UZ.P097             | Ctrl   | 3,472649261       | 0,949109024       |
| UZ.P058             | IPA    | 2,775017666       | 0,819649258       |
| UZ.P098             | Ctrl   | 0,532200944       | 0,248205458       |
| UZ.P099             | Ctrl   | 3,751047314       | 0,962547828       |
| UZ.P100             | Ctrl   | 2,6399937         | 0,840780245       |
| UZ.P101             | Ctrl   | 3,174070093       | 0,916563768       |
| UZ.P102             | Ctrl   | 1,350104955       | 0,589114891       |
| UZ.P103             | Ctrl   | 3,011321619       | 0,912132314       |
| UZ.P104             | Ctrl   | 3,346697128       | 0,944058467       |
| UZ.P105             | Ctrl   | 2,212794373       | 0,736134765       |
| UZ.P106             | Ctrl   | 3,60711658        | 0,960014709       |
| UZ.P107             | Ctrl   | 2,441726502       | 0,878272261       |
| UZ.P108             | Ctrl   | 2,390890551       | 0,860316541       |
| UZ.P110             | Ctrl   | 2,230038305       | 0,855713542       |
| UZ.P111             | Ctrl   | 3,018391103       | 0,861229423       |
| UZ.P112             | Ctrl   | 3,530532086       | 0,945818431       |
| UZ.P113             | Ctrl   | 1,409423999       | 0,568408757       |
| UZ.P114             | Ctrl   | 2,22589473        | 0,802808535       |
| UZ.P060             | IPA    | 2,915713721       | 0,862307614       |
| UZ.P061             | IPA    | 1,593820547       | 0,51989304        |
| UZ.P063             | IPA    | 2,320498319       | 0,823266597       |
| UZ.P064             | IPA    | 3,229032527       | 0,91032557        |
| UZ.P124             | IPA    | 1,784265254       | 0,742695592       |
| UZ.P127             | IPA    | 2,324072479       | 0,789989734       |
| UZ.P128             | IPA    | 0,722987392       | 0,251944819       |

## alpha\_diversities-1

|         |      |             |             |
|---------|------|-------------|-------------|
| UZ.P129 | IPA  | 0,382282048 | 0,11469907  |
| UZ.P130 | IPA  | 0,511359484 | 0,173426778 |
| UZ.P131 | IPA  | 1,261266036 | 0,648385665 |
| UZ.P132 | IPA  | 0,318472874 | 0,099428115 |
| UZ.P133 | IPA  | 1,917789531 | 0,798826689 |
| UZ.P115 | IPA  | 2,433499171 | 0,829100727 |
| UZ.P134 | IPA  | 2,03537859  | 0,716255749 |
| UZ.P135 | IPA  | 1,171958933 | 0,65649438  |
| UZ.P136 | IPA  | 0,899827681 | 0,443285296 |
| UZ.P137 | IPA  | 1,326583561 | 0,619372946 |
| UZ.P138 | IPA  | 2,315339877 | 0,855188761 |
| UZ.P139 | IPA  | 3,555104921 | 0,94999995  |
| UZ.P140 | Ctrl | 2,779846414 | 0,889801683 |
| UZ.P141 | Ctrl | 2,892248994 | 0,916628909 |
| UZ.P142 | Ctrl | 3,442783967 | 0,952697601 |
| UZ.P143 | Ctrl | 0,095714675 | 0,028309326 |
| UZ.P116 | IPA  | 1,287662792 | 0,465836095 |
| UZ.P144 | Ctrl | 2,724769445 | 0,901162636 |
| UZ.P145 | Ctrl | 3,080267478 | 0,925943227 |
| UZ.P146 | Ctrl | 3,283095225 | 0,937827528 |
| UZ.P147 | Ctrl | 1,072540837 | 0,386290271 |
| UZ.P148 | Ctrl | 3,15827751  | 0,879918307 |
| UZ.P149 | Ctrl | 1,522953283 | 0,568496727 |
| UZ.P150 | Ctrl | 1,112371278 | 0,419803791 |
| UZ.P151 | Ctrl | 1,517480205 | 0,681352087 |
| UZ.P152 | Ctrl | 3,580406763 | 0,957905766 |
| UZ.P153 | Ctrl | 3,834298355 | 0,967861333 |
| UZ.P117 | IPA  | 1,365873168 | 0,671840487 |
| UZ.P154 | Ctrl | 2,707923437 | 0,897713109 |
| UZ.P155 | Ctrl | 1,880862556 | 0,745559473 |
| UZ.P156 | Ctrl | 1,981861354 | 0,698898879 |
| UZ.P157 | Ctrl | 2,612032242 | 0,852520178 |
| UZ.P158 | Ctrl | 1,623136065 | 0,571247942 |
| UZ.P159 | Ctrl | 3,054918635 | 0,902228311 |
| UZ.P160 | Ctrl | 2,424074885 | 0,799069577 |
| UZ.P161 | Ctrl | 1,460975909 | 0,60958694  |
| UZ.P162 | Ctrl | 2,762609034 | 0,886582537 |
| UZ.P163 | Ctrl | 2,091113685 | 0,755472809 |
| UZ.P164 | Ctrl | 2,522668652 | 0,768102633 |
| UZ.P119 | IPA  | 2,492621939 | 0,858063563 |
| UZ.P120 | IPA  | 1,605307337 | 0,700729653 |
| UZ.P121 | IPA  | 2,457587409 | 0,868493931 |
| UZ.P122 | IPA  | 1,094647418 | 0,357732128 |
| UZ.P123 | IPA  | 3,298641201 | 0,942390091 |
